# Supplementary material for: Stereoselectivity in Butadiene Polymerization Promoted by Using Ziegler–Natta Catalysts Based on (Anilidomethyl)pyridine Group (IV) Complexes
Source: MDPI journal article supplement (doi:10.3390/sym16010018), 2023-12-22
Supplement: s1 [file s1]

# Supplementary Information

## **Stereoselectivity in Butadiene Polymerization Promoted by Zieger-Natta Catalysts Based on (Anilidomethyl)pyridine Group (IV) Complexes**

*Stefano Milione,\* Stefania Pragliola*

*Department of Chemistry, University of Salerno Via Giovanni Paolo II, 84084 Fisciano, Salerno  
(Italy)*

**Cartesian coordinates and energies of calculated structures**

**Zirconium - Path 1****1<sub>Zr</sub> anti-P/cis-P**

E: -1010.28016020 A.U.

|    |             |             |             |
|----|-------------|-------------|-------------|
| Zr | -0.10735600 | 0.80314500  | -0.07033800 |
| N  | -2.07496100 | -0.47405800 | -0.23453400 |
| N  | 0.30656300  | -1.04822100 | 0.60416000  |
| C  | -1.96631000 | -1.76093900 | 0.21644600  |
| C  | -3.06622100 | -2.63789800 | 0.20845800  |
| H  | -2.94635300 | -3.66486100 | 0.58683200  |
| C  | -4.29897400 | -2.19420300 | -0.28740800 |
| H  | -5.16892700 | -2.86904500 | -0.30645700 |
| C  | -4.40663800 | -0.87091600 | -0.75686300 |
| H  | -5.35549000 | -0.47728800 | -1.15080700 |
| C  | -3.28194200 | -0.04618100 | -0.70520000 |
| H  | -3.34167300 | 1.00123000  | -1.03951800 |
| C  | -0.60167500 | -2.18011100 | 0.71189900  |
| H  | -0.23514600 | -3.06009000 | 0.13541000  |
| C  | 1.69834900  | -1.12483900 | 0.31861000  |
| C  | 2.15423700  | -1.56834700 | -0.98628100 |
| C  | 3.53403800  | -1.57129700 | -1.24494700 |
| H  | 3.89826500  | -1.90496400 | -2.22996600 |
| C  | 4.45925000  | -1.17005200 | -0.26262800 |
| H  | 5.53668100  | -1.18398700 | -0.49143500 |
| C  | 4.02379100  | -0.78996000 | 1.01574600  |
| H  | 4.76506900  | -0.53439600 | 1.78970600  |
| C  | 2.65507000  | -0.78919500 | 1.35080000  |
| C  | 1.20636400  | -2.07888200 | -2.04933700 |
| H  | 0.15467600  | -1.75259300 | -1.91347500 |
| C  | 2.25172600  | -0.59933800 | 2.79011900  |
| H  | 1.15553900  | -0.59315000 | 2.93151400  |
| H  | 1.53701400  | -1.78491700 | -3.06668800 |
| H  | 1.19002700  | -3.19144100 | -2.04962600 |
| H  | 2.68469300  | 0.32538200  | 3.22457300  |
| H  | 2.65853800  | -1.43869600 | 3.39510100  |
| C  | -2.00964100 | 0.88595100  | 2.68203100  |
| H  | -2.75690500 | 0.11606200  | 2.40767200  |
| H  | -0.67225200 | -2.52409200 | 1.77204400  |
| H  | -1.07218200 | 0.38364400  | 2.99275000  |
| C  | -1.83228600 | 1.92306000  | 1.60060400  |
| C  | -0.68281200 | 2.69763500  | 1.39490900  |
| C  | 1.02751500  | 2.64350500  | -1.63322700 |
| H  | 1.18535100  | 3.59928500  | -1.10468100 |
| C  | 2.04632400  | 1.72432200  | -1.64733700 |
| H  | 2.02997200  | 0.82852300  | -2.29006400 |
| C  | -0.28327200 | 2.45600800  | -2.27566500 |
| H  | -0.93087900 | 3.34760400  | -2.34616900 |
| C  | -0.77610900 | 1.24808300  | -2.68894400 |
| H  | -0.15428800 | 0.32846700  | -2.72354200 |
| H  | -1.77195400 | 1.15798600  | -3.14925400 |
| H  | 2.98567800  | 1.91709300  | -1.10523100 |
| H  | -2.76965800 | 2.32368200  | 1.17461800  |
| H  | -0.80834100 | 3.60120300  | 0.76560800  |
| C  | 0.64582600  | 2.24994000  | 1.65926100  |
| H  | 1.48311600  | 2.93713700  | 1.45632400  |
| H  | 0.82158500  | 1.56523200  | 2.50743700  |
| H  | -2.40878500 | 1.39908300  | 3.58717800  |

**TS<sub>1-2Zr</sub> anti-P/cis-P**

E: -1010.25310770 A.U.

|    |             |             |             |
|----|-------------|-------------|-------------|
| Zr | -0.04551600 | 0.63948700  | -0.34229500 |
| N  | -2.10587500 | -0.43837500 | -0.24010800 |
| N  | 0.19606700  | -1.14754900 | 0.54339000  |
| C  | -2.11114200 | -1.69070800 | 0.31405400  |
| C  | -3.29542300 | -2.44309300 | 0.40126200  |
| H  | -3.27277600 | -3.44494200 | 0.85720800  |
| C  | -4.48864900 | -1.91245000 | -0.10841000 |
| H  | -5.42342200 | -2.49212500 | -0.05477900 |
| C  | -4.47373300 | -0.63217200 | -0.69581700 |
| H  | -5.38581600 | -0.18274400 | -1.11577800 |
| C  | -3.26877900 | 0.07118600  | -0.73628100 |
| H  | -3.21997700 | 1.07836900  | -1.18291000 |
| C  | -0.76728000 | -2.20201300 | 0.78406000  |
| H  | -0.50858000 | -3.14159900 | 0.24169000  |
| C  | 1.61624600  | -1.23414100 | 0.40887300  |
| C  | 2.20007800  | -1.77713100 | -0.80228100 |
| C  | 3.59176400  | -1.66450600 | -0.97674600 |
| H  | 4.05073600  | -2.05947700 | -1.89717300 |
| C  | 4.40709400  | -1.08400900 | 0.01171200  |
| H  | 5.49349400  | -1.00821100 | -0.15296500 |
| C  | 3.85242800  | -0.64562900 | 1.22360700  |
| H  | 4.51148500  | -0.25603900 | 2.01593900  |
| C  | 2.46676800  | -0.73827900 | 1.46535100  |
| C  | 1.38694400  | -2.54800700 | -1.81699700 |
| H  | 0.32313800  | -2.24386900 | -1.86769600 |
| C  | 1.93563500  | -0.44710000 | 2.84638100  |
| H  | 0.83090100  | -0.42663800 | 2.88191600  |
| H  | 1.82331200  | -2.47035500 | -2.83240600 |
| H  | 1.40166300  | -3.62984500 | -1.55620600 |
| H  | 2.34189300  | 0.49600600  | 3.26728200  |
| H  | 2.26622500  | -1.25277900 | 3.53820100  |
| C  | -1.63654900 | 1.31148600  | 2.95392500  |
| H  | -2.25045400 | 0.38644000  | 2.93231900  |
| H  | -0.81036600 | -2.48257700 | 1.86460600  |
| H  | -0.60143100 | 1.07586500  | 3.26148200  |
| C  | -1.74786000 | 2.07843400  | 1.68309900  |
| C  | -0.74523800 | 2.68023400  | 0.94621500  |
| C  | 0.78009500  | 2.79725600  | -1.87859400 |
| H  | 0.61464900  | 3.88333700  | -1.97791300 |
| C  | 1.70258800  | 2.37345200  | -0.86484700 |
| H  | 2.15375000  | 1.34688000  | -0.91340100 |
| C  | -0.01513300 | 1.95218900  | -2.68103400 |
| H  | -0.77650700 | 2.45008100  | -3.30809900 |
| C  | -0.01715800 | 0.52659600  | -2.64485500 |
| H  | 0.96239600  | 0.01495600  | -2.46236600 |
| H  | -0.65496000 | -0.03204700 | -3.34768600 |
| H  | 2.46784200  | 3.08687800  | -0.52922900 |
| H  | -2.78030600 | 2.29798000  | 1.35386900  |
| H  | -1.08112400 | 3.38034900  | 0.15616800  |
| C  | 0.70647500  | 2.53424600  | 1.10423300  |
| H  | 1.25058300  | 3.49059400  | 1.09523700  |
| H  | 1.07904800  | 1.88643900  | 1.92084600  |
| H  | -2.09112200 | 1.93600900  | 3.75920600  |

**1<sub>Zr</sub> anti-P/cis-S**

E: -1010.27519411 A.U.

|    |             |             |             |
|----|-------------|-------------|-------------|
| Zr | -0.09234300 | 0.71828900  | -0.13581300 |
| N  | -1.88768300 | -0.80327500 | -0.19449000 |
| N  | 0.60269300  | -1.15650800 | -0.07627100 |

|   |             |             |             |
|---|-------------|-------------|-------------|
| C | -1.55250200 | -2.13186000 | -0.19825600 |
| C | -2.53011300 | -3.13936400 | -0.26321200 |
| H | -2.22054200 | -4.19579200 | -0.26515400 |
| C | -3.88429600 | -2.78581700 | -0.32475600 |
| H | -4.66329900 | -3.56231900 | -0.37733400 |
| C | -4.22952000 | -1.42123300 | -0.31722100 |
| H | -5.27915200 | -1.09474600 | -0.36353500 |
| C | -3.21016400 | -0.47015500 | -0.24962100 |
| H | -3.44488000 | 0.60392100  | -0.24022400 |
| C | -0.07606500 | -2.43132500 | -0.12763200 |
| H | 0.23859100  | -3.03627500 | -1.01225500 |
| C | 1.99889300  | -0.92059600 | 0.11678500  |
| C | 2.84999800  | -0.73022800 | -1.03637000 |
| C | 4.18934600  | -0.35174200 | -0.82025600 |
| H | 4.85037700  | -0.18978600 | -1.68679100 |
| C | 4.70594100  | -0.23339000 | 0.47939700  |
| H | 5.75873600  | 0.05584700  | 0.62457000  |
| C | 3.90537500  | -0.53005400 | 1.59669100  |
| H | 4.34554800  | -0.49322000 | 2.60596000  |
| C | 2.55705900  | -0.89895400 | 1.44849400  |
| C | 2.39770300  | -1.06978900 | -2.43625400 |
| H | 1.29926600  | -1.16232900 | -2.53507300 |
| C | 1.77454800  | -1.35352400 | 2.65607700  |
| H | 0.67968200  | -1.36285300 | 2.49281400  |
| H | 2.77422100  | -0.34473900 | -3.18655200 |
| H | 2.82860400  | -2.05360500 | -2.72615500 |
| H | 1.99891900  | -0.73554000 | 3.54897800  |
| H | 2.07261300  | -2.39230500 | 2.92042300  |
| C | -2.52701600 | 1.16505600  | 2.69967000  |
| H | -3.44267300 | 0.70480200  | 2.27521200  |
| H | 0.15031800  | -3.06159600 | 0.76548600  |
| H | -1.80192700 | 0.36816700  | 2.95374800  |
| C | -1.98226800 | 2.25682100  | 1.83867700  |
| C | -0.63586900 | 2.56399200  | 1.63528500  |
| C | 0.08704500  | 1.55619100  | -2.60725600 |
| H | 0.33843100  | 0.87451000  | -3.43708000 |
| C | 1.11857300  | 2.14387200  | -1.90764100 |
| H | 0.94378600  | 2.93195600  | -1.14168300 |
| C | -1.32674000 | 1.64333300  | -2.24661800 |
| H | -1.99899800 | 0.90881000  | -2.72130900 |
| C | -1.86606500 | 2.59315600  | -1.40238100 |
| H | -1.29525100 | 3.47460000  | -1.06734000 |
| H | -2.94947200 | 2.62221800  | -1.21036200 |
| H | 2.16797000  | 2.00601300  | -2.20757700 |
| H | -2.71282900 | 3.01370200  | 1.50088200  |
| H | -0.42588000 | 3.53820600  | 1.15420000  |
| C | 0.47980400  | 1.69858100  | 1.88749900  |
| H | 1.49705200  | 2.13312000  | 1.84445400  |
| H | 0.37534400  | 0.88925900  | 2.63333000  |
| H | -2.85789500 | 1.62906000  | 3.65962700  |

#### TS<sub>1-2Zr</sub> anti-P/cis-S

E: -1010.27455352 A.U.

|    |             |             |             |
|----|-------------|-------------|-------------|
| Zr | -0.10895000 | 0.69968900  | -0.42247900 |
| N  | -2.14624100 | -0.45840900 | -0.24780000 |
| N  | 0.17641000  | -0.87860800 | 0.77708500  |
| C  | -2.13540000 | -1.51766400 | 0.61877100  |
| C  | -3.30018500 | -2.26039400 | 0.88264200  |
| H  | -3.25924900 | -3.10583000 | 1.58678200  |
| C  | -4.49575800 | -1.92176600 | 0.23482300  |
| H  | -5.41514000 | -2.49764400 | 0.42386700  |

|   |             |             |             |
|---|-------------|-------------|-------------|
| C | -4.50042800 | -0.83902400 | -0.66575100 |
| H | -5.41442900 | -0.54208600 | -1.20125000 |
| C | -3.31258900 | -0.13647600 | -0.87561000 |
| H | -3.28419900 | 0.71671000  | -1.57286900 |
| C | -0.79811600 | -1.84920500 | 1.24233300  |
| H | -0.50028300 | -2.88770700 | 0.96939200  |
| C | 1.58786000  | -1.08630500 | 0.64453500  |
| C | 2.08708400  | -1.96259500 | -0.39029000 |
| C | 3.47513000  | -2.03572400 | -0.58490100 |
| H | 3.87399100  | -2.69322600 | -1.37389700 |
| C | 4.36563400  | -1.28616100 | 0.20990500  |
| H | 5.44971600  | -1.35497300 | 0.02800700  |
| C | 3.88196400  | -0.48428600 | 1.25114400  |
| H | 4.59050200  | 0.05354100  | 1.90121000  |
| C | 2.49817200  | -0.39325000 | 1.51775900  |
| C | 1.17065300  | -2.82106400 | -1.23163600 |
| H | 0.18559200  | -2.35289400 | -1.43854600 |
| C | 2.04210400  | 0.30778700  | 2.77346100  |
| H | 0.94117200  | 0.35195400  | 2.85760700  |
| H | 1.64056900  | -3.07870000 | -2.20095300 |
| H | 0.96599700  | -3.78972800 | -0.72375500 |
| H | 2.46352100  | 1.33116600  | 2.86432400  |
| H | 2.41403600  | -0.24990400 | 3.66002500  |
| C | -1.59902800 | 1.77486800  | 2.57427700  |
| H | -2.12255000 | 0.80587800  | 2.70856400  |
| H | -0.87425200 | -1.84553900 | 2.35691500  |
| H | -0.55272100 | 1.69401300  | 2.92054500  |
| C | -1.75876500 | 2.32086000  | 1.19309700  |
| C | -0.81171400 | 2.95480800  | 0.40047000  |
| C | 1.74966500  | 1.09841900  | -1.93822800 |
| H | 2.69302200  | 0.56430100  | -1.73344700 |
| C | 1.62210400  | 2.42893400  | -1.42953500 |
| H | 0.96182600  | 3.14390200  | -1.95247700 |
| C | 0.79270800  | 0.42163200  | -2.76765100 |
| H | 1.12095400  | -0.53869000 | -3.20102200 |
| C | -0.56544100 | 0.72695500  | -2.84178600 |
| H | -0.93797200 | 1.75463300  | -2.61266400 |
| H | -1.24806900 | 0.11251800  | -3.44745700 |
| H | 2.54437400  | 2.87707200  | -1.03214100 |
| H | -2.80317500 | 2.40092900  | 0.83994600  |
| H | -1.20651900 | 3.52175700  | -0.46697700 |
| C | 0.63956700  | 2.92213300  | 0.52639800  |
| H | 1.14686400  | 3.86457500  | 0.27624500  |
| H | 1.08131400  | 2.45738200  | 1.43101200  |
| H | -2.11942200 | 2.48324200  | 3.26182500  |

#### 1<sub>Zr</sub> anti-S/cis-P

E: -1010.28475131 A.U.

|    |             |             |             |
|----|-------------|-------------|-------------|
| Zr | 0.27065800  | 0.80328200  | -0.11790300 |
| N  | 2.14572000  | -0.60963100 | 0.08539600  |
| N  | -0.38581700 | -1.09500200 | 0.06129600  |
| C  | 1.86268000  | -1.94547300 | 0.14038300  |
| C  | 2.88011500  | -2.90820500 | 0.26273300  |
| H  | 2.61680200  | -3.97653700 | 0.29970200  |
| C  | 4.21635300  | -2.49423600 | 0.33940600  |
| H  | 5.02622700  | -3.23425900 | 0.43398400  |
| C  | 4.50392000  | -1.11684900 | 0.29898700  |
| H  | 5.53685600  | -0.74365800 | 0.36326000  |
| C  | 3.44695100  | -0.21376200 | 0.17126400  |
| H  | 3.64252800  | 0.86878600  | 0.13471200  |
| C  | 0.40272000  | -2.31675100 | 0.06725500  |

|   |             |             |             |
|---|-------------|-------------|-------------|
| H | 0.12258600  | -2.96372100 | 0.93257200  |
| C | -1.81722200 | -1.07157300 | 0.04248700  |
| C | -2.54194400 | -0.95335000 | 1.28591400  |
| C | -3.94192900 | -0.81732400 | 1.23565600  |
| H | -4.50793900 | -0.71975300 | 2.17605400  |
| C | -4.62789200 | -0.85191700 | 0.01191100  |
| H | -5.72380600 | -0.74446400 | -0.00584300 |
| C | -3.92939100 | -1.08155300 | -1.18606000 |
| H | -4.48813700 | -1.17595400 | -2.13098500 |
| C | -2.53098400 | -1.22793500 | -1.20103800 |
| C | -1.87376700 | -1.11344000 | 2.63286100  |
| H | -0.77611400 | -1.23211400 | 2.56296500  |
| C | -1.85413100 | -1.64533800 | -2.48410900 |
| H | -0.75247700 | -1.55646300 | -2.45261700 |
| H | -2.10635400 | -0.27977500 | 3.33154600  |
| H | -2.26449600 | -2.02585700 | 3.13237600  |
| H | -2.23542400 | -1.07398800 | -3.35508800 |
| H | -2.09061900 | -2.71167700 | -2.69425600 |
| C | 2.05694500  | 2.42770800  | -1.54682000 |
| H | 3.15765600  | 2.39337700  | -1.65366800 |
| H | 0.20643800  | -2.93614200 | -0.84080800 |
| H | 1.69136200  | 3.39096300  | -1.96367300 |
| C | 1.40093600  | 1.22549600  | -2.19893000 |
| C | 0.03631500  | 1.23636100  | -2.57112900 |
| C | -0.41072100 | 2.96219100  | 1.34671200  |
| H | -0.33677300 | 3.90325700  | 0.77400200  |
| C | -1.62926600 | 2.34189100  | 1.43261400  |
| H | -1.81038100 | 1.48591100  | 2.10205500  |
| C | 0.83657000  | 2.48324100  | 1.96719100  |
| H | 1.69675600  | 3.17494600  | 1.92316000  |
| C | 1.01574000  | 1.25287400  | 2.54065800  |
| H | 0.18100200  | 0.54630200  | 2.70140400  |
| H | 1.99040700  | 0.96129100  | 2.96165400  |
| H | -2.50752400 | 2.75447700  | 0.91212400  |
| H | 2.06161900  | 0.48519000  | -2.67582000 |
| H | -0.31903800 | 0.40651400  | -3.20340600 |
| C | -0.91051400 | 2.04295200  | -1.91430600 |
| H | -1.98376200 | 1.92227800  | -2.12967600 |
| H | -0.61860300 | 3.05100600  | -1.56289300 |
| H | 1.89667000  | 2.54117800  | -0.42541200 |

#### TS<sub>1-2Zr</sub> anti-S/cis-P

E: -1010.25617581 A.U.

|    |             |             |             |
|----|-------------|-------------|-------------|
| Zr | 0.04650700  | 0.50585100  | 0.42480300  |
| N  | 2.01352000  | -0.70621600 | 0.07844100  |
| N  | -0.39015900 | -1.46727100 | 0.33857900  |
| C  | 1.89752300  | -2.07048800 | 0.12204900  |
| C  | 3.02809100  | -2.90360000 | 0.06068500  |
| H  | 2.90119600  | -3.99637900 | 0.10189300  |
| C  | 4.30220300  | -2.33199600 | -0.05461100 |
| H  | 5.19759700  | -2.97086500 | -0.10653600 |
| C  | 4.41828600  | -0.92951700 | -0.10344000 |
| H  | 5.39830700  | -0.43776900 | -0.19280500 |
| C  | 3.25735900  | -0.15832800 | -0.03315200 |
| H  | 3.31034300  | 0.94124800  | -0.06400800 |
| C  | 0.48968500  | -2.61061300 | 0.23890300  |
| H  | 0.40553800  | -3.26479000 | 1.14015800  |
| C  | -1.77831400 | -1.32805900 | 0.10558700  |
| C  | -2.53508100 | -0.68408800 | 1.15700700  |
| C  | -3.83971900 | -0.20835700 | 0.85449500  |
| H  | -4.42630800 | 0.29074000  | 1.64257200  |

|   |             |             |             |
|---|-------------|-------------|-------------|
| C | -4.41230000 | -0.44254800 | -0.39637900 |
| H | -5.43506000 | -0.09407000 | -0.60880700 |
| C | -3.70119300 | -1.16551400 | -1.38222800 |
| H | -4.18482800 | -1.37436100 | -2.35008700 |
| C | -2.38793200 | -1.60971700 | -1.17146100 |
| C | -2.10894700 | -0.73646800 | 2.61588700  |
| H | -1.03933500 | -0.98254100 | 2.76757800  |
| C | -1.66045100 | -2.36968200 | -2.25450800 |
| H | -0.60627900 | -2.04470900 | -2.37973900 |
| H | -2.36348700 | 0.19049100  | 3.16937300  |
| H | -2.67757200 | -1.55245200 | 3.11528600  |
| H | -2.16828200 | -2.25598300 | -3.23109900 |
| H | -1.63751100 | -3.45894300 | -2.03084500 |
| C | 1.44929000  | 3.29454400  | -2.39655700 |
| H | 1.62464000  | 3.49042100  | -3.48165300 |
| H | 0.25553600  | -3.26555100 | -0.63083600 |
| H | 0.60576900  | 3.93344000  | -2.07596200 |
| C | 1.21814700  | 1.83228000  | -2.24417900 |
| C | 0.02791200  | 1.18387900  | -1.94541200 |
| C | 0.37347100  | 3.13403200  | 0.91218600  |
| H | 0.76029000  | 4.00988800  | 0.36841100  |
| C | -0.98749200 | 2.78013700  | 0.70550200  |
| H | -1.51308800 | 2.09319100  | 1.41601600  |
| C | 1.29784100  | 2.41378200  | 1.71825900  |
| H | 2.35099200  | 2.74185500  | 1.66749900  |
| C | 0.99669300  | 1.24905300  | 2.45888100  |
| H | -0.02014300 | 1.12919600  | 2.89681900  |
| H | 1.78679600  | 0.74700700  | 3.03848700  |
| H | -1.68771100 | 3.52777600  | 0.30899400  |
| H | 2.05843300  | 1.18153900  | -2.54867900 |
| H | 0.01607500  | 0.08459000  | -2.11428900 |
| C | -1.18675800 | 1.77567600  | -1.42403600 |
| H | -2.11021000 | 1.16779300  | -1.43846500 |
| H | -1.36060800 | 2.83615300  | -1.65127000 |
| H | 2.38523500  | 3.62702400  | -1.90014800 |

#### 1<sub>Zr</sub> anti-S/cis-S

E: -1010.28662491 A.U.

|    |             |             |             |
|----|-------------|-------------|-------------|
| Zr | 0.21243100  | 0.77584100  | -0.00235400 |
| N  | 2.20143400  | -0.52791400 | 0.01339300  |
| N  | -0.26842100 | -1.16908400 | -0.00727400 |
| C  | 2.01127700  | -1.88312600 | -0.01917800 |
| C  | 3.09150700  | -2.78262100 | -0.01201200 |
| H  | 2.89683900  | -3.86582600 | -0.03899900 |
| C  | 4.40131200  | -2.28826500 | 0.03297400  |
| H  | 5.25975400  | -2.97790700 | 0.03939200  |
| C  | 4.59807900  | -0.89539000 | 0.07729000  |
| H  | 5.60707600  | -0.45922800 | 0.12215800  |
| C  | 3.48108400  | -0.05844300 | 0.06795400  |
| H  | 3.61045900  | 1.03312600  | 0.11075200  |
| C  | 0.57776500  | -2.34479800 | -0.04874800 |
| H  | 0.37244900  | -3.02281000 | 0.81411600  |
| C  | -1.69938700 | -1.18938800 | -0.01636600 |
| C  | -2.42036800 | -1.25307700 | 1.23206900  |
| C  | -3.82253200 | -1.14665100 | 1.19640300  |
| H  | -4.38969400 | -1.17945800 | 2.14049300  |
| C  | -4.51146500 | -1.04262200 | -0.02405500 |
| H  | -5.60981100 | -0.96111100 | -0.02651400 |
| C  | -3.81389400 | -1.09968900 | -1.24141900 |
| H  | -4.37348600 | -1.09650800 | -2.19050300 |
| C  | -2.41067600 | -1.20770300 | -1.27156100 |

|   |             |             |             |
|---|-------------|-------------|-------------|
| C | -1.73249300 | -1.55998900 | 2.54192500  |
| H | -0.64668700 | -1.34312700 | 2.53200200  |
| C | -1.71966700 | -1.48706700 | -2.58563300 |
| H | -0.63522200 | -1.26725400 | -2.57319600 |
| H | -2.20235700 | -1.03069400 | 3.39609100  |
| H | -1.84002900 | -2.64443900 | 2.76660600  |
| H | -2.19209700 | -0.94308800 | -3.42877600 |
| H | -1.82646700 | -2.56762100 | -2.82953000 |
| C | 1.78994600  | 2.30251600  | -1.71717700 |
| H | 2.80231600  | 2.00416400  | -2.04548900 |
| H | 0.38344200  | -2.95561500 | -0.96279000 |
| H | 1.61906900  | 3.37284000  | -1.96656300 |
| C | 0.72977400  | 1.39472400  | -2.26386500 |
| C | -0.64770200 | 1.72540000  | -2.17458000 |
| C | -0.85558300 | 1.70860900  | 2.08178700  |
| H | -1.57986700 | 0.97321200  | 2.46394400  |
| C | -1.33218800 | 2.76659900  | 1.31949800  |
| H | -0.72985500 | 3.67002000  | 1.13878600  |
| C | 0.54354900  | 1.50110300  | 2.44063500  |
| H | 0.76623600  | 0.62983600  | 3.08202200  |
| C | 1.59793200  | 2.24359700  | 1.95184800  |
| H | 1.44875500  | 3.21842800  | 1.45552100  |
| H | 2.63180000  | 1.99195500  | 2.23383300  |
| H | -2.41222600 | 2.85690700  | 1.13263700  |
| H | 1.03593200  | 0.57936800  | -2.93858100 |
| H | -1.36776000 | 1.04753700  | -2.66212100 |
| C | -1.14939100 | 2.74900400  | -1.35610100 |
| H | -2.23519200 | 2.91432500  | -1.30780700 |
| H | -0.51752200 | 3.61712900  | -1.10712000 |
| H | 1.85452800  | 2.33486900  | -0.56917400 |

#### TS<sub>1-2Zr</sub> anti-S/cis-S

E: -1010.28027721 A.U.

|    |             |             |             |
|----|-------------|-------------|-------------|
| Zr | 0.20642700  | 0.72702100  | 0.01999900  |
| N  | 2.23195800  | -0.49390800 | -0.00029400 |
| N  | -0.19090700 | -1.23415200 | -0.04796200 |
| C  | 2.10572400  | -1.85682600 | -0.06471000 |
| C  | 3.22781000  | -2.70227700 | -0.09177800 |
| H  | 3.08539400  | -3.79268700 | -0.14265400 |
| C  | 4.51292100  | -2.14578400 | -0.05143000 |
| H  | 5.40343900  | -2.79322400 | -0.07164400 |
| C  | 4.64400600  | -0.74630700 | 0.02078000  |
| H  | 5.63166000  | -0.26336300 | 0.06037900  |
| C  | 3.48879800  | 0.03612000  | 0.04691000  |
| H  | 3.56512900  | 1.13182300  | 0.11243400  |
| C  | 0.69298300  | -2.38035400 | -0.09372000 |
| H  | 0.51932400  | -3.07117600 | 0.76593200  |
| C  | -1.61932400 | -1.27304300 | -0.04374600 |
| C  | -2.32915900 | -1.41677200 | 1.20668700  |
| C  | -3.73244200 | -1.33367300 | 1.18848400  |
| H  | -4.29044700 | -1.42877900 | 2.13375500  |
| C  | -4.43479300 | -1.17097700 | -0.01890200 |
| H  | -5.53455300 | -1.11128800 | -0.00663200 |
| C  | -3.74899300 | -1.13921800 | -1.24332800 |
| H  | -4.31815400 | -1.08788700 | -2.18542900 |
| C  | -2.34386300 | -1.22223500 | -1.29194900 |
| C  | -1.62072300 | -1.76688600 | 2.49357700  |
| H  | -0.54701900 | -1.49509100 | 2.49491700  |
| C  | -1.66195700 | -1.39368400 | -2.62868100 |
| H  | -0.56444400 | -1.26565500 | -2.58112700 |
| H  | -2.11219500 | -1.30891100 | 3.37604900  |

|   |             |             |             |
|---|-------------|-------------|-------------|
| H | -1.67387800 | -2.86649000 | 2.65647400  |
| H | -2.07530900 | -0.71449200 | -3.40263400 |
| H | -1.85225800 | -2.42361400 | -3.00309100 |
| C | 1.54404300  | 2.29827800  | -1.85072200 |
| H | 2.44262700  | 1.90210200  | -2.35760300 |
| H | 0.52288700  | -2.99278200 | -1.01167400 |
| H | 1.47586200  | 3.39659200  | -2.01795600 |
| C | 0.29877500  | 1.57369800  | -2.26376300 |
| C | -0.98233400 | 1.94575000  | -1.82583600 |
| C | -0.76802100 | 1.54187900  | 2.04501300  |
| H | -1.35516200 | 0.72791100  | 2.49625500  |
| C | -1.47547000 | 2.54880700  | 1.31315400  |
| H | -1.14654800 | 3.59444000  | 1.42593100  |
| C | 0.63929400  | 1.60771000  | 2.36275400  |
| H | 1.03854700  | 0.82863600  | 3.03728000  |
| C | 1.52930900  | 2.45990000  | 1.73102200  |
| H | 1.18143000  | 3.36240900  | 1.19881600  |
| H | 2.60419300  | 2.41740900  | 1.96382400  |
| H | -2.56638400 | 2.41537700  | 1.26235400  |
| H | 0.37883400  | 0.81292900  | -3.05681400 |
| H | -1.84811800 | 1.39826600  | -2.23510900 |
| C | -1.22737600 | 2.92857400  | -0.80536900 |
| H | -2.25816000 | 3.30971100  | -0.76474000 |
| H | -0.46440100 | 3.71806000  | -0.68840200 |
| H | 1.77803200  | 2.25923900  | -0.72772800 |

#### 2Zr anti-P/cis-P

E: -1010.30261519 A.U.

|    |             |             |             |
|----|-------------|-------------|-------------|
| Zr | -0.09660000 | 0.45020200  | -0.16752600 |
| N  | -1.48397600 | -1.43246700 | -0.10043800 |
| N  | 0.82497300  | -1.05768800 | 0.88290800  |
| C  | -1.05162400 | -2.49552800 | 0.64890100  |
| C  | -1.85059800 | -3.63424200 | 0.84826600  |
| H  | -1.46923700 | -4.46310800 | 1.46425700  |
| C  | -3.11526900 | -3.70441400 | 0.25022000  |
| H  | -3.75197400 | -4.59180100 | 0.39070400  |
| C  | -3.55019100 | -2.62544000 | -0.54263100 |
| H  | -4.52884000 | -2.63936700 | -1.04491900 |
| C  | -2.71311100 | -1.51949200 | -0.69186100 |
| H  | -3.02299900 | -0.66800400 | -1.31467600 |
| C  | 0.33892400  | -2.37517900 | 1.21754400  |
| H  | 0.97573800  | -3.19431700 | 0.82058800  |
| C  | 2.11824300  | -0.57671400 | 0.65772800  |
| C  | 3.22067700  | -1.29129700 | 0.06818400  |
| C  | 4.31720600  | -0.53212000 | -0.36798800 |
| H  | 5.17011500  | -1.06423800 | -0.81979700 |
| C  | 4.36486400  | 0.88021000  | -0.28467200 |
| H  | 5.24575900  | 1.41970500  | -0.66455900 |
| C  | 3.32445500  | 1.57350100  | 0.32463000  |
| H  | 3.39530800  | 2.66289800  | 0.47279500  |
| C  | 2.20694200  | 0.86294500  | 0.85215600  |
| C  | 3.22957900  | -2.78960900 | -0.12205400 |
| H  | 2.41249700  | -3.13087500 | -0.79384100 |
| C  | 1.28218800  | 1.56834300  | 1.82328200  |
| H  | 1.07815300  | 0.96627400  | 2.73046200  |
| H  | 4.18158900  | -3.11373500 | -0.58347500 |
| H  | 3.13578600  | -3.33647400 | 0.83955500  |
| H  | 0.24454000  | 1.88892800  | 1.44676700  |
| H  | 1.70087000  | 2.54961500  | 2.12163300  |
| C  | -1.88902900 | 3.27662400  | 2.54771400  |
| H  | -1.19893500 | 3.01384800  | 3.37694000  |

|   |             |             |             |
|---|-------------|-------------|-------------|
| H | 0.31584700  | -2.51778400 | 2.32445900  |
| H | -1.46893500 | 4.11614700  | 1.96193200  |
| C | -2.26232400 | 2.08075100  | 1.73678900  |
| C | -2.35961300 | 1.98056500  | 0.37145700  |
| C | -1.34202800 | 1.27385500  | -2.27599600 |
| H | -2.39113200 | 1.09243500  | -2.56706400 |
| C | -1.06030800 | 2.64452800  | -1.68894200 |
| H | -0.03286200 | 2.70032700  | -1.21871400 |
| C | -0.37471900 | 0.35598800  | -2.68207200 |
| H | -0.73563100 | -0.57710500 | -3.15122200 |
| C | 0.99059600  | 0.42675000  | -2.24864200 |
| H | 1.51455600  | 1.40228400  | -2.26585500 |
| H | 1.65640400  | -0.41648500 | -2.49719300 |
| H | -0.95959600 | 3.39326500  | -2.50970100 |
| H | -2.56775900 | 1.18985600  | 2.31959900  |
| H | -2.86694300 | 1.06793800  | -0.00039700 |
| C | -2.12811000 | 3.07367700  | -0.65822600 |
| H | -3.08780100 | 3.26857900  | -1.18697400 |
| H | -1.83848700 | 4.03257200  | -0.18520300 |
| H | -2.80951900 | 3.64942200  | 3.05496300  |

#### 2<sub>Zr</sub> anti-P/cis-S

E: -1010.30165448 A.U.

|    |             |             |             |
|----|-------------|-------------|-------------|
| Zr | -0.06370600 | 0.42659600  | -0.22601800 |
| N  | -2.14079000 | -0.63007900 | -0.09432900 |
| N  | 0.16700000  | -1.41365800 | 0.53653200  |
| C  | -2.15355500 | -1.87633900 | 0.47155300  |
| C  | -3.35431800 | -2.57725900 | 0.67215900  |
| H  | -3.33133000 | -3.57806600 | 1.13018700  |
| C  | -4.56700500 | -1.99473200 | 0.27782900  |
| H  | -5.51686800 | -2.53243700 | 0.42327300  |
| C  | -4.54976700 | -0.71820200 | -0.31513500 |
| H  | -5.47595900 | -0.22759200 | -0.64932800 |
| C  | -3.32229800 | -0.07529200 | -0.48647000 |
| H  | -3.27241200 | 0.91567400  | -0.96469600 |
| C  | -0.80051700 | -2.44371700 | 0.84275100  |
| H  | -0.61438800 | -3.38365500 | 0.27270800  |
| C  | 1.57468900  | -1.35119300 | 0.65733800  |
| C  | 2.47486000  | -2.20201900 | -0.06540100 |
| C  | 3.83971400  | -1.86552600 | -0.04582100 |
| H  | 4.55286700  | -2.51105900 | -0.58337300 |
| C  | 4.31790000  | -0.71509200 | 0.61784200  |
| H  | 5.39346400  | -0.48086600 | 0.59415500  |
| C  | 3.44014400  | 0.10824400  | 1.33026200  |
| H  | 3.83005100  | 0.97065800  | 1.89378000  |
| C  | 2.05994500  | -0.21144900 | 1.39928100  |
| C  | 1.98154200  | -3.41514700 | -0.81104200 |
| H  | 1.09872200  | -3.18556500 | -1.44480200 |
| C  | 1.16349700  | 0.50786800  | 2.39733100  |
| H  | 0.38891200  | 1.21868000  | 1.97966500  |
| H  | 2.77143500  | -3.83240100 | -1.46375800 |
| H  | 1.68164900  | -4.22446100 | -0.11009200 |
| H  | 1.76545300  | 1.16123700  | 3.05850400  |
| H  | 0.60078500  | -0.20597900 | 3.03138400  |
| C  | -0.92190400 | 3.53064400  | 2.29907800  |
| H  | -1.20671500 | 2.90421700  | 3.17018000  |
| H  | -0.77466800 | -2.72756600 | 1.92159800  |
| H  | 0.17186400  | 3.69674900  | 2.28804500  |
| C  | -1.48484400 | 3.00511300  | 1.02186600  |
| C  | -0.85617800 | 2.89202000  | -0.19374500 |
| C  | 1.55987200  | 1.19517700  | -1.89985700 |

|   |             |             |             |
|---|-------------|-------------|-------------|
| H | 2.62942300  | 0.98214400  | -1.73168000 |
| C | 1.14595200  | 2.67180300  | -1.86054200 |
| H | 0.41805800  | 2.88111600  | -2.67483200 |
| C | 0.79407100  | 0.18417900  | -2.51564600 |
| H | 1.29436100  | -0.78474000 | -2.69908600 |
| C | -0.62086000 | 0.22659100  | -2.56853500 |
| H | -1.12812700 | 1.20149200  | -2.71845000 |
| H | -1.17388100 | -0.63610600 | -2.96936300 |
| H | 2.05757500  | 3.25422900  | -2.10699000 |
| H | -2.56476900 | 2.76434600  | 1.04330100  |
| H | -1.51613700 | 2.70324400  | -1.06652500 |
| C | 0.58116300  | 3.27606200  | -0.53188500 |
| H | 0.60271200  | 4.38350800  | -0.65262700 |
| H | 1.27385100  | 3.08670000  | 0.32310000  |
| H | -1.40378300 | 4.51841900  | 2.49178500  |

#### 2<sub>Zr</sub> anti-S/cis-P

E: -1010.30277920 A.U.

|    |             |             |             |
|----|-------------|-------------|-------------|
| Zr | 0.02744500  | -0.54256600 | -0.02592900 |
| N  | -1.45045600 | 1.28456200  | 0.09276500  |
| N  | 0.99795300  | 1.19236900  | -0.46416500 |
| C  | -0.94392100 | 2.51833300  | -0.21274200 |
| C  | -1.75274200 | 3.66726200  | -0.23164100 |
| H  | -1.30696700 | 4.64274100  | -0.47985300 |
| C  | -3.11608800 | 3.55443100  | 0.07073900  |
| H  | -3.76531800 | 4.44379300  | 0.06533200  |
| C  | -3.63712100 | 2.28614500  | 0.38801500  |
| H  | -4.69921400 | 2.14945100  | 0.64010600  |
| C  | -2.77699700 | 1.18659600  | 0.39158600  |
| H  | -3.14829300 | 0.18525900  | 0.65067600  |
| C  | 0.53396200  | 2.55847300  | -0.51062700 |
| H  | 1.04982300  | 3.21481600  | 0.22600300  |
| C  | 2.28186400  | 0.63422800  | -0.51883100 |
| C  | 3.41650800  | 1.06072700  | 0.24989500  |
| C  | 4.51361200  | 0.18600800  | 0.31159000  |
| H  | 5.39802900  | 0.49442800  | 0.89243800  |
| C  | 4.51314600  | -1.08596000 | -0.30782200 |
| H  | 5.39044400  | -1.74254200 | -0.20318000 |
| C  | 3.42826800  | -1.48683400 | -1.08667900 |
| H  | 3.46465000  | -2.44074600 | -1.63650500 |
| C  | 2.31496900  | -0.61648000 | -1.25436800 |
| C  | 3.43512600  | 2.37074900  | 0.99743500  |
| H  | 2.59442200  | 2.44546000  | 1.72058200  |
| C  | 1.33094700  | -0.87581800 | -2.38238700 |
| H  | 0.28338800  | -1.25129800 | -2.11169200 |
| H  | 4.37414800  | 2.48246800  | 1.57153100  |
| H  | 3.36890900  | 3.24102100  | 0.31061700  |
| H  | 1.68782300  | -1.69724300 | -3.03469100 |
| H  | 1.15550900  | 0.02422800  | -3.00414200 |
| C  | -3.75797500 | -1.26720400 | -1.88310100 |
| H  | -4.27943900 | -1.88567700 | -2.65009500 |
| H  | 0.71872300  | 3.01536200  | -1.51194200 |
| H  | -4.36509600 | -1.30459400 | -0.95971300 |
| C  | -2.37376800 | -1.80165400 | -1.72976500 |
| C  | -1.83698900 | -2.45435000 | -0.64836600 |
| C  | -1.27037100 | -1.24551700 | 2.20048300  |
| H  | -2.11347600 | -0.63208000 | 2.56339800  |
| C  | -1.61041900 | -2.68765200 | 1.86262500  |
| H  | -0.69303900 | -3.30203700 | 1.73182600  |
| C  | 0.01220900  | -0.75605100 | 2.45301100  |
| H  | 0.08825500  | 0.23937300  | 2.92962600  |

|   |             |             |             |
|---|-------------|-------------|-------------|
| C | 1.19417100  | -1.29552300 | 1.84976900  |
| H | 1.25180900  | -2.38735400 | 1.65189200  |
| H | 2.17001400  | -0.84336300 | 2.08836400  |
| H | -2.11683900 | -3.11412500 | 2.75844700  |
| H | -1.75239900 | -1.73876700 | -2.64494000 |
| H | -0.85910200 | -2.96884700 | -0.82413300 |
| C | -2.52707200 | -2.85760400 | 0.63664400  |
| H | -2.82246200 | -3.92783900 | 0.54594000  |
| H | -3.47475000 | -2.29553800 | 0.77337000  |
| H | -3.75774600 | -0.23607200 | -2.29505600 |

|   |             |            |            |
|---|-------------|------------|------------|
| H | 2.75374600  | 1.95401000 | 1.16912600 |
| C | 1.50317700  | 3.39477300 | 0.03491000 |
| H | 2.09537300  | 4.30014300 | 0.30716800 |
| H | 0.44962500  | 3.74516500 | 0.00740600 |
| H | -0.90657100 | 3.18392600 | 1.49741400 |

## Zirconium - Path 2

### 2<sub>Zr</sub> anti-S/cis-S

E: -1010.30346507 A.U.

|    |             |             |             |
|----|-------------|-------------|-------------|
| Zr | -0.13511700 | 0.60635100  | -0.00482000 |
| N  | -2.35188300 | -0.13023700 | 0.02283800  |
| N  | -0.13828000 | -1.34949100 | -0.32590600 |
| C  | -2.52074200 | -1.47145500 | -0.19190700 |
| C  | -3.79945700 | -2.05405800 | -0.20591500 |
| H  | -3.90397700 | -3.13454000 | -0.38956300 |
| C  | -4.92615400 | -1.25046400 | 0.01748800  |
| H  | -5.93498400 | -1.69191100 | 0.01404000  |
| C  | -4.74860900 | 0.12874600  | 0.23803400  |
| H  | -5.60489500 | 0.79790000  | 0.40912400  |
| C  | -3.45343700 | 0.64892000  | 0.22278400  |
| H  | -3.28308500 | 1.72884500  | 0.36162100  |
| C  | -1.25461400 | -2.27215700 | -0.41214700 |
| H  | -1.29352000 | -2.78123200 | -1.40491200 |
| C  | 1.21749100  | -1.62938400 | 0.03118500  |
| C  | 2.19996100  | -1.92322300 | -0.97686500 |
| C  | 3.53423400  | -2.09582000 | -0.56336500 |
| H  | 4.30418500  | -2.32397500 | -1.31757000 |
| C  | 3.89751000  | -2.00053300 | 0.79088200  |
| H  | 4.94966400  | -2.14242800 | 1.08392700  |
| C  | 2.92906000  | -1.75359700 | 1.77856900  |
| H  | 3.22473000  | -1.72414900 | 2.83934300  |
| C  | 1.57590800  | -1.58643200 | 1.42892100  |
| C  | 1.81681200  | -2.13344400 | -2.41849100 |
| H  | 0.85262000  | -1.65737700 | -2.68051800 |
| C  | 0.52090700  | -1.48894900 | 2.50952500  |
| H  | -0.34185600 | -0.82135100 | 2.26297600  |
| H  | 2.60230600  | -1.76791900 | -3.10938400 |
| H  | 1.70631900  | -3.22159800 | -2.62342000 |
| H  | 0.94787800  | -1.14519600 | 3.47129200  |
| H  | 0.06025500  | -2.48357300 | 2.69879700  |
| C  | -0.59725300 | 2.39024700  | 2.20738200  |
| H  | -1.34053500 | 1.54751200  | 2.17576100  |
| H  | -1.16765800 | -3.08643100 | 0.34457000  |
| H  | -0.75396600 | 2.79669100  | 3.23201400  |
| C  | 0.83264600  | 1.92993200  | 2.04996500  |
| C  | 1.73033900  | 2.37044000  | 1.11227400  |
| C  | 1.45036300  | 1.54088700  | -1.84379300 |
| H  | 2.23370900  | 0.85243100  | -2.20367300 |
| C  | 1.98257400  | 2.89153100  | -1.34632800 |
| H  | 1.74439400  | 3.66683800  | -2.10829100 |
| C  | 0.16471900  | 1.28796000  | -2.35763000 |
| H  | 0.05951700  | 0.40346500  | -3.01313000 |
| C  | -1.03710300 | 1.84811700  | -1.85154200 |
| H  | -1.02438100 | 2.87076800  | -1.41858300 |
| H  | -1.99496200 | 1.55993600  | -2.31084800 |
| H  | 3.08864800  | 2.81739600  | -1.32162400 |
| H  | 1.20323300  | 1.22848400  | 2.81758900  |

### 1<sub>Zr</sub> syn-P/trans-P

E: -1010.28089423 A.U.

|    |             |             |             |
|----|-------------|-------------|-------------|
| Zr | 0.12009100  | 0.72717600  | 0.04916800  |
| N  | 1.98814800  | -0.70084700 | 0.16338500  |
| N  | -0.44360500 | -1.08630900 | -0.60785800 |
| C  | 1.76104800  | -1.98736200 | -0.24525100 |
| C  | 2.77956100  | -2.95578900 | -0.22835100 |
| H  | 2.56415500  | -3.97820500 | -0.57526600 |
| C  | 4.05470300  | -2.60857900 | 0.23875300  |
| H  | 4.86215900  | -3.35674900 | 0.26653900  |
| C  | 4.28396000  | -1.28892100 | 0.66988100  |
| H  | 5.26821400  | -0.97046900 | 1.04446600  |
| C  | 3.23483500  | -0.36904000 | 0.60659700  |
| H  | 3.38957500  | 0.67642000  | 0.91363400  |
| C  | 0.35292800  | -2.30065300 | -0.69398300 |
| H  | -0.07614100 | -3.11972300 | -0.07156300 |
| C  | -1.83976900 | -1.03273800 | -0.32692300 |
| C  | -2.31490500 | -1.32593500 | 1.01149600  |
| C  | -3.69187000 | -1.21785900 | 1.27040700  |
| H  | -4.07204700 | -1.43656800 | 2.28121200  |
| C  | -4.59219700 | -0.85660300 | 0.25237000  |
| H  | -5.66802300 | -0.78379600 | 0.47741800  |
| C  | -4.13811400 | -0.62378100 | -1.05623400 |
| H  | -4.86547600 | -0.39403700 | -1.85119100 |
| C  | -2.77379400 | -0.73052300 | -1.38580800 |
| C  | -1.39281600 | -1.81683100 | 2.10625600  |
| H  | -0.32374200 | -1.55419600 | 1.95143300  |
| C  | -2.35114600 | -0.66584300 | -2.83053700 |
| H  | -1.25300900 | -0.67812400 | -2.95998600 |
| H  | -1.70525400 | -1.44779200 | 3.10443000  |
| H  | -1.42624800 | -2.92709400 | 2.17121200  |
| H  | -2.77322100 | 0.22204500  | -3.34518300 |
| H  | -2.75466500 | -1.55002500 | -3.37107500 |
| C  | 1.72375500  | 1.58825800  | -1.84469100 |
| H  | 0.36102700  | -2.69146200 | -1.74000600 |
| H  | 1.45632500  | 0.66988700  | -2.41114200 |
| C  | 0.69459500  | 2.50612300  | -1.61225000 |
| C  | -0.68335400 | 2.13835900  | -1.66123700 |
| C  | -0.78090400 | 2.72407800  | 1.58228600  |
| H  | -0.95112200 | 3.64063100  | 0.99232000  |
| C  | -1.82802300 | 1.85841600  | 1.77037700  |
| H  | -1.78156200 | 1.02425200  | 2.49010000  |
| C  | 0.57551200  | 2.53084700  | 2.12307800  |
| H  | 1.25616100  | 3.39859000  | 2.06909700  |
| C  | 1.05891200  | 1.34326800  | 2.59784000  |
| H  | 0.41565400  | 0.45137000  | 2.75208400  |
| H  | 2.08424600  | 1.25413700  | 2.98825000  |
| H  | -2.80858700 | 2.04881700  | 1.30608600  |
| H  | 0.97334600  | 3.48582300  | -1.17427800 |
| H  | -0.98507300 | 1.39531400  | -2.42165500 |
| C  | 3.18484000  | 1.93332100  | -1.80939700 |

|   |             |            |             |
|---|-------------|------------|-------------|
| H | 3.82171100  | 1.07596100 | -1.51417900 |
| H | 3.51352800  | 2.21351800 | -2.83571600 |
| H | 3.40391500  | 2.79782900 | -1.15030400 |
| H | -1.44784100 | 2.90342400 | -1.45022100 |

#### TS1-2Zr syn-P/trans-P

E: -1010.25642850 A.U.

|    |             |             |             |
|----|-------------|-------------|-------------|
| Zr | -0.03474700 | 0.64154600  | -0.30858900 |
| N  | -2.01978600 | -0.57768500 | -0.22883100 |
| N  | 0.36305200  | -1.23187000 | 0.28973700  |
| C  | -1.90756200 | -1.90418000 | 0.09151300  |
| C  | -3.02888100 | -2.75136900 | 0.09070900  |
| H  | -2.91026000 | -3.81309100 | 0.35660000  |
| C  | -4.28358100 | -2.23472000 | -0.26276900 |
| H  | -5.17047500 | -2.88728400 | -0.27771300 |
| C  | -4.39148300 | -0.87258500 | -0.60268200 |
| H  | -5.35495200 | -0.42807900 | -0.89325400 |
| C  | -3.24187100 | -0.08042800 | -0.56724900 |
| H  | -3.28861500 | 0.99078300  | -0.82455800 |
| C  | -0.50804800 | -2.38184400 | 0.40834500  |
| H  | -0.21741800 | -3.20056400 | -0.29251200 |
| C  | 1.78944700  | -1.17289200 | 0.26752400  |
| C  | 2.49168600  | -1.36147100 | -0.98490600 |
| C  | 3.87993400  | -1.11690500 | -1.01208000 |
| H  | 4.42920300  | -1.24322800 | -1.95882000 |
| C  | 4.57681200  | -0.76037100 | 0.15309800  |
| H  | 5.66284500  | -0.58286500 | 0.10706100  |
| C  | 3.90753500  | -0.67016800 | 1.38613600  |
| H  | 4.47948000  | -0.44375700 | 2.30027000  |
| C  | 2.52152200  | -0.89037700 | 1.47946300  |
| C  | 1.82358400  | -1.94540600 | -2.20992600 |
| H  | 0.72127500  | -1.84042600 | -2.21596900 |
| C  | 1.85857700  | -0.91893800 | 2.83491100  |
| H  | 0.75395200  | -0.88172300 | 2.77601900  |
| H  | 2.22986900  | -1.51487700 | -3.14716400 |
| H  | 2.04017800  | -3.03585100 | -2.25452500 |
| H  | 2.21758000  | -0.10341600 | 3.49570600  |
| H  | 2.11930500  | -1.86782600 | 3.35372700  |
| C  | -1.44489900 | 1.41197500  | 2.12436200  |
| H  | -0.46612900 | -2.83330300 | 1.42936500  |
| H  | -0.92391900 | 0.54846700  | 2.58576000  |
| C  | -0.67752800 | 2.36267100  | 1.48212400  |
| C  | 0.78023300  | 2.30379200  | 1.33891100  |
| C  | 0.29211200  | 3.08724500  | -1.53906300 |
| H  | -0.01571100 | 4.13905700  | -1.41639800 |
| C  | 1.41809700  | 2.64507200  | -0.77206100 |
| H  | 1.97108700  | 1.71558100  | -1.07235400 |
| C  | -0.51017400 | 2.27192400  | -2.36825800 |
| H  | -1.41396200 | 2.74457100  | -2.79257300 |
| C  | -0.32647200 | 0.87780200  | -2.58650300 |
| H  | 0.72311400  | 0.48492400  | -2.60179300 |
| H  | -0.98179500 | 0.34355100  | -3.29184200 |
| H  | 2.13532100  | 3.39856500  | -0.41900500 |
| H  | -1.19359600 | 3.25829000  | 1.08761800  |
| H  | 1.31635000  | 1.53270300  | 1.92723200  |
| C  | -2.90131500 | 1.53127100  | 2.40569000  |
| H  | -3.44435000 | 0.58571300  | 2.19807100  |
| H  | -3.03176900 | 1.70747600  | 3.49911800  |
| H  | -3.38206500 | 2.37201200  | 1.86897400  |
| H  | 1.27614500  | 3.27905500  | 1.44643400  |

#### 1Zr syn-P/trans-S

E: -1010.28213210 A.U.

|    |             |             |             |
|----|-------------|-------------|-------------|
| Zr | 0.18348100  | 0.76767500  | 0.33875400  |
| N  | 2.10563200  | -0.56415200 | 0.13284600  |
| N  | -0.38355100 | -1.00953400 | -0.37785000 |
| C  | 1.88016200  | -1.82727000 | -0.33933800 |
| C  | 2.92575400  | -2.75872500 | -0.46809400 |
| H  | 2.71178700  | -3.76700400 | -0.85502200 |
| C  | 4.22618100  | -2.39270800 | -0.09497900 |
| H  | 5.05534000  | -3.11193200 | -0.18298500 |
| C  | 4.45374300  | -1.09252900 | 0.39466300  |
| H  | 5.45731600  | -0.76180700 | 0.70103000  |
| C  | 3.37331800  | -0.21242700 | 0.48685400  |
| H  | 3.52081700  | 0.81538600  | 0.85643100  |
| C  | 0.45030000  | -2.15661000 | -0.69657200 |
| H  | 0.11312200  | -3.06069300 | -0.13606300 |
| C  | -1.81619700 | -0.99785300 | -0.45579600 |
| C  | -2.58779500 | -1.47671300 | 0.66426300  |
| C  | -3.98823300 | -1.36339400 | 0.60360400  |
| H  | -4.59381400 | -1.71737400 | 1.45334300  |
| C  | -4.62647800 | -0.83628500 | -0.53216300 |
| H  | -5.72461100 | -0.75644000 | -0.55508000 |
| C  | -3.87523400 | -0.45253600 | -1.65329900 |
| H  | -4.39104700 | -0.09639400 | -2.55938300 |
| C  | -2.47009100 | -0.54826100 | -1.65628700 |
| C  | -1.95577200 | -2.18418900 | 1.84009900  |
| H  | -0.87224200 | -1.98244400 | 1.94762500  |
| C  | -1.72483700 | -0.27586100 | -2.94245000 |
| H  | -0.62447500 | -0.30292900 | -2.82813400 |
| H  | -2.46467000 | -1.93350800 | 2.79318600  |
| H  | -2.06715700 | -3.28452400 | 1.71950300  |
| H  | -2.01271800 | 0.69541500  | -3.39758800 |
| H  | -1.98991600 | -1.04967600 | -3.69500700 |
| C  | 1.46268000  | 1.78266900  | -1.77178800 |
| H  | 0.36998300  | -2.42772600 | -1.77724200 |
| H  | 0.94710200  | 0.97981800  | -2.33977800 |
| C  | 0.66184200  | 2.76545000  | -1.18335300 |
| C  | -0.74875500 | 2.65391700  | -1.00112400 |
| C  | -1.34987300 | 1.36171100  | 2.27964200  |
| H  | -2.31531600 | 0.83097200  | 2.32407900  |
| C  | -1.31593300 | 2.60502300  | 1.65548700  |
| H  | -0.47413200 | 3.30924300  | 1.78314100  |
| C  | -0.21442400 | 0.70290200  | 2.90293900  |
| H  | -0.43276000 | -0.21425600 | 3.47501500  |
| C  | 1.11057500  | 1.03126100  | 2.68968500  |
| H  | 1.41337400  | 2.01689000  | 2.26522400  |
| H  | 1.92022700  | 0.45244600  | 3.15897000  |
| H  | -2.25173500 | 3.04289100  | 1.28009000  |
| H  | 1.17307800  | 3.63549700  | -0.72426100 |
| H  | -1.32510600 | 1.98317200  | -1.66645700 |
| C  | 2.92997700  | 1.92935100  | -2.02276300 |
| H  | 3.47602900  | 0.96807200  | -1.94276300 |
| H  | 3.07609000  | 2.26945300  | -3.07434600 |
| H  | 3.40683300  | 2.68559400  | -1.36745300 |
| H  | -1.30068300 | 3.54913800  | -0.68658900 |

#### TS1-2Zr syn-P/trans-S

E: -1010.27934047 A.U.

|    |            |             |            |
|----|------------|-------------|------------|
| Zr | 0.15259700 | 0.71273000  | 0.36741800 |
| N  | 2.12428600 | -0.54291400 | 0.17350600 |



|   |             |             |             |
|---|-------------|-------------|-------------|
| N | -0.31439100 | -1.07721200 | -0.39183200 |
| C | 1.96686700  | -1.80851900 | -0.32064100 |
| C | 3.06333100  | -2.67424600 | -0.47949200 |
| H | 2.90389700  | -3.68758400 | -0.87916000 |
| C | 4.34564600  | -2.23568500 | -0.12191900 |
| H | 5.21476900  | -2.90224500 | -0.23545000 |
| C | 4.50386400  | -0.93205000 | 0.38596100  |
| H | 5.49107100  | -0.54712000 | 0.68187700  |
| C | 3.37386800  | -0.12221200 | 0.51655100  |
| H | 3.46368400  | 0.90246400  | 0.91273200  |
| C | 0.55223400  | -2.20941400 | -0.66609100 |
| H | 0.25088400  | -3.10358300 | -0.07000500 |
| C | -1.74488000 | -1.07354900 | -0.47280800 |
| C | -2.52135000 | -1.59724200 | 0.62524400  |
| C | -3.92062400 | -1.48309000 | 0.56333600  |
| H | -4.52934200 | -1.87102800 | 1.39573700  |
| C | -4.55549200 | -0.90480600 | -0.55058600 |
| H | -5.65378900 | -0.82658700 | -0.57392000 |
| C | -3.80166400 | -0.46730100 | -1.64943000 |
| H | -4.31523200 | -0.07291900 | -2.54089600 |
| C | -2.39595500 | -0.56706800 | -1.65352100 |
| C | -1.88564800 | -2.32578600 | 1.78447400  |
| H | -0.82778800 | -2.04480600 | 1.95766400  |
| C | -1.64493700 | -0.23946100 | -2.92446500 |
| H | -0.56376300 | -0.46480100 | -2.85659300 |
| H | -2.45349000 | -2.17209500 | 2.72385700  |
| H | -1.89857900 | -3.42240400 | 1.59596900  |
| H | -1.77296000 | 0.81969000  | -3.23692900 |
| H | -2.05056500 | -0.84581900 | -3.76153100 |
| C | 1.26628300  | 1.87224800  | -1.77464700 |
| H | 0.48372000  | -2.52555600 | -1.73488600 |
| H | 0.66029400  | 1.13001200  | -2.33560000 |
| C | 0.58329500  | 2.81858400  | -1.01889400 |
| C | -0.83290800 | 2.79306200  | -0.72963800 |
| C | -1.41068200 | 1.30977600  | 2.14687200  |
| H | -2.36076800 | 0.75242500  | 2.18728200  |
| C | -1.41166200 | 2.56796200  | 1.47823200  |
| H | -0.67970600 | 3.34214100  | 1.76882300  |
| C | -0.29188100 | 0.75746600  | 2.86268300  |
| H | -0.48989000 | -0.14055200 | 3.47264600  |
| C | 1.03503400  | 1.11642300  | 2.64550900  |
| H | 1.30078800  | 2.11356900  | 2.22033100  |
| H | 1.85157000  | 0.60544300  | 3.17689600  |
| H | -2.39419200 | 2.95996700  | 1.17818400  |
| H | 1.17665700  | 3.62915300  | -0.55044300 |
| H | -1.48886500 | 2.17486600  | -1.37466500 |
| C | 2.71273600  | 1.95656500  | -2.14099500 |
| H | 3.21018200  | 0.96554100  | -2.13064400 |
| H | 2.78974900  | 2.31952700  | -3.19206600 |
| H | 3.27815400  | 2.66630200  | -1.50537400 |
| H | -1.28246900 | 3.76774900  | -0.49668000 |

#### 1<sub>Zr</sub> syn-S/trans-P

E: -1010.28132436 A.U.

|    |             |             |             |
|----|-------------|-------------|-------------|
| Zr | -0.16928800 | 0.80294600  | 0.01253900  |
| N  | -2.06424200 | -0.55394200 | -0.24871100 |
| N  | 0.40977700  | -1.10465800 | 0.12687800  |
| C  | -1.83828300 | -1.89762000 | -0.13047400 |
| C  | -2.87649700 | -2.83280600 | -0.28237700 |
| H  | -2.66201400 | -3.90711400 | -0.17315100 |
| C  | -4.17016600 | -2.38491500 | -0.58368900 |

|   |             |             |             |
|---|-------------|-------------|-------------|
| H | -4.99405800 | -3.10420300 | -0.71152600 |
| C | -4.39561500 | -1.00322400 | -0.72696400 |
| H | -5.39207800 | -0.60639400 | -0.97185700 |
| C | -3.32431500 | -0.12607100 | -0.54406900 |
| H | -3.47134800 | 0.96177100  | -0.63872400 |
| C | -0.41023900 | -2.30502400 | 0.14530400  |
| H | -0.06392500 | -3.03895200 | -0.61997300 |
| C | 1.83735400  | -1.06399900 | 0.10808900  |
| C | 2.52896700  | -1.07892400 | -1.16295800 |
| C | 3.93019000  | -0.94986000 | -1.16202900 |
| H | 4.47353200  | -0.95656100 | -2.12060000 |
| C | 4.64654100  | -0.85417300 | 0.04187900  |
| H | 5.74358000  | -0.75867100 | 0.01886800  |
| C | 3.97882200  | -0.92254200 | 1.27702500  |
| H | 4.56163400  | -0.90012700 | 2.21171400  |
| C | 2.58035200  | -1.05255000 | 1.34455500  |
| C | 1.81985000  | -1.36066700 | -2.46763200 |
| H | 0.71770900  | -1.26954000 | -2.40189700 |
| C | 1.92085300  | -1.27095100 | 2.68261100  |
| H | 0.81998100  | -1.17706100 | 2.64366400  |
| H | 2.18868200  | -0.71841200 | -3.29488200 |
| H | 2.02967700  | -2.40481500 | -2.78849300 |
| H | 2.31389500  | -0.57867700 | 3.45507900  |
| H | 2.15128900  | -2.29627700 | 3.04653800  |
| C | -1.64734700 | 1.70739200  | 1.85444800  |
| H | -0.33739100 | -2.83386100 | 1.12606500  |
| H | -1.71990500 | 2.59822200  | 1.17624400  |
| C | -0.38835400 | 1.46668000  | 2.42554000  |
| C | 0.81093200  | 1.96520800  | 1.85111600  |
| C | 0.67768400  | 2.93431900  | -1.41395600 |
| H | 0.71504500  | 3.84945100  | -0.79702200 |
| C | 1.82455600  | 2.20140400  | -1.57066300 |
| H | 1.90239200  | 1.37442900  | -2.29581200 |
| C | -0.62418000 | 2.61999500  | -2.02818400 |
| H | -1.38862600 | 3.41659600  | -1.98322900 |
| C | -0.96741600 | 1.41072700  | -2.56678800 |
| H | -0.23543400 | 0.58699700  | -2.70134200 |
| H | -1.96410500 | 1.23680700  | -3.00081400 |
| H | 2.75291700  | 2.49167500  | -1.05387500 |
| H | -0.32987600 | 0.68156000  | 3.20223000  |
| H | 0.79940200  | 2.99485300  | 1.44510400  |
| C | -2.94147200 | 1.25408900  | 2.46934400  |
| H | -3.33539500 | 2.05645600  | 3.13245600  |
| H | -3.73503700 | 1.05111800  | 1.72412800  |
| H | -2.80321300 | 0.34948200  | 3.09486900  |
| H | 1.78211800  | 1.65469200  | 2.26674700  |

#### TS<sub>1-2Zr</sub> syn-S/trans-P

E: -1010.25955656 A.U.

|    |             |             |             |
|----|-------------|-------------|-------------|
| Zr | 0.02701200  | 0.68405200  | -0.29468600 |
| N  | -2.01729500 | -0.47106400 | -0.29587100 |
| N  | 0.35602800  | -1.30237700 | -0.58242400 |
| C  | -1.95917700 | -1.81371100 | -0.56109100 |
| C  | -3.12365400 | -2.58870700 | -0.69944300 |
| H  | -3.03718800 | -3.66466000 | -0.91595100 |
| C  | -4.37861400 | -1.98079200 | -0.56542500 |
| H  | -5.30086400 | -2.57254300 | -0.67367800 |
| C  | -4.43808600 | -0.60049900 | -0.29572900 |
| H  | -5.40021900 | -0.07770000 | -0.18937700 |
| C  | -3.24395700 | 0.11092100  | -0.16797700 |
| H  | -3.25710100 | 1.19240000  | 0.03405400  |

|   |             |             |             |
|---|-------------|-------------|-------------|
| C | -0.57484600 | -2.39819500 | -0.70996500 |
| H | -0.47835300 | -2.89577200 | -1.70518300 |
| C | 1.75027200  | -1.27080500 | -0.38825300 |
| C | 2.46000100  | -0.34901500 | -1.25102100 |
| C | 3.79386900  | 0.00951000  | -0.91406100 |
| H | 4.34650000  | 0.70823500  | -1.56249600 |
| C | 4.43223200  | -0.58165300 | 0.17655800  |
| H | 5.47533700  | -0.32078800 | 0.41382900  |
| C | 3.75865700  | -1.55008700 | 0.95733100  |
| H | 4.29326400  | -2.03094100 | 1.79246100  |
| C | 2.42270200  | -1.90487300 | 0.71704400  |
| C | 1.93974300  | 0.02015800  | -2.63342000 |
| H | 0.83301200  | -0.01936300 | -2.74716100 |
| C | 1.73830200  | -2.92914000 | 1.58968200  |
| H | 0.72464800  | -2.61134100 | 1.91297500  |
| H | 2.31329600  | 1.00606100  | -2.97512000 |
| H | 2.31217200  | -0.72841400 | -3.36883400 |
| H | 2.33227300  | -3.13505200 | 2.50033600  |
| H | 1.62090100  | -3.89775100 | 1.05663300  |
| C | -1.01453800 | 1.26763900  | 2.51355300  |
| H | -0.41458500 | -3.20186200 | 0.04439400  |
| H | -1.04645600 | 2.37201700  | 2.55902700  |
| C | 0.19466500  | 0.67214500  | 2.18084300  |
| C | 1.38133800  | 1.40043000  | 1.78209500  |
| C | -0.21302600 | 3.35780200  | 0.01333100  |
| H | -0.52379200 | 4.04358100  | 0.81840500  |
| C | 1.13909300  | 2.92244600  | 0.00481100  |
| H | 1.58003100  | 2.44951700  | -0.90804200 |
| C | -1.21534800 | 2.92524800  | -0.89813700 |
| H | -2.25069800 | 3.23215500  | -0.66747300 |
| C | -0.99294500 | 2.05303000  | -1.98601800 |
| H | -0.02343600 | 2.10157700  | -2.52359500 |
| H | -1.83911500 | 1.74856900  | -2.62157100 |
| H | 1.90318000  | 3.50411000  | 0.53815600  |
| H | 0.26189500  | -0.43370700 | 2.22324100  |
| H | 1.53298900  | 2.37885900  | 2.25799300  |
| C | -2.21031400 | 0.54948400  | 3.03302500  |
| H | -2.28580100 | 0.75434600  | 4.12739300  |
| H | -3.15786100 | 0.93816200  | 2.60623200  |
| H | -2.15965000 | -0.54790300 | 2.89597600  |
| H | 2.31581400  | 0.83221900  | 1.62649700  |

#### 1<sub>Zr</sub> syn-S/trans-S

E: -1010.28237476 A.U.

|    |             |             |             |
|----|-------------|-------------|-------------|
| Zr | 0.18038600  | 0.85517200  | 0.15242300  |
| N  | 2.15924800  | -0.39715600 | 0.22891700  |
| N  | -0.31411900 | -1.06959800 | -0.05539600 |
| C  | 1.98810800  | -1.74768700 | 0.10821600  |
| C  | 3.08049600  | -2.63232500 | 0.15876500  |
| H  | 2.90879700  | -3.71518900 | 0.05848700  |
| C  | 4.37365300  | -2.12322500 | 0.33692700  |
| H  | 5.23978500  | -2.80183300 | 0.38023500  |
| C  | 4.54650000  | -0.73093400 | 0.45836600  |
| H  | 5.54286800  | -0.28599200 | 0.59879200  |
| C  | 3.42033600  | 0.09187000  | 0.39688300  |
| H  | 3.52622500  | 1.18579400  | 0.48397300  |
| C  | 0.56743500  | -2.22463200 | -0.07828800 |
| H  | 0.29616500  | -2.95181600 | 0.72369900  |
| C  | -1.74316300 | -1.12690700 | -0.16312200 |
| C  | -2.53855300 | -1.33032800 | 1.02207800  |
| C  | -3.93762200 | -1.25780400 | 0.90367700  |

|   |             |             |             |
|---|-------------|-------------|-------------|
| H | -4.56149400 | -1.40010400 | 1.80063500  |
| C | -4.55126800 | -1.03859900 | -0.34214000 |
| H | -5.64908100 | -0.98164700 | -0.40838100 |
| C | -3.77607200 | -0.94480000 | -1.50731400 |
| H | -4.27246400 | -0.84593100 | -2.48590600 |
| C | -2.36987900 | -1.02054600 | -1.45566700 |
| C | -1.92584800 | -1.72037100 | 2.34668900  |
| H | -0.85597800 | -1.44873900 | 2.43494200  |
| C | -1.59619400 | -1.13883800 | -2.74771500 |
| H | -0.50636100 | -0.99079700 | -2.62675600 |
| H | -2.47981100 | -1.28647800 | 3.20389500  |
| H | -1.98722200 | -2.82382200 | 2.47529700  |
| H | -1.97498000 | -0.44182300 | -3.52312500 |
| H | -1.73892900 | -2.16025500 | -3.16463900 |
| C | 1.36284300  | 1.66494500  | -1.92469900 |
| H | 0.46942300  | -2.78673900 | -1.03783800 |
| H | 1.87620000  | 2.39905900  | -1.25122300 |
| C | -0.00687600 | 1.87951500  | -2.14446800 |
| C | -0.80794400 | 2.73496600  | -1.34706300 |
| C | -1.26505000 | 1.69629300  | 2.04984500  |
| H | -2.13900700 | 1.04728100  | 2.22141600  |
| C | -1.42465800 | 2.82572000  | 1.25554200  |
| H | -0.69270400 | 3.64997100  | 1.27257100  |
| C | -0.02349300 | 1.32460900  | 2.71497700  |
| H | -0.08178300 | 0.51179400  | 3.45876500  |
| C | 1.22254300  | 1.79729800  | 2.36358600  |
| H | 1.35604900  | 2.70154600  | 1.72981400  |
| H | 2.12908500  | 1.43197100  | 2.86933000  |
| H | -2.41207100 | 3.06487300  | 0.83494100  |
| H | -0.51465100 | 1.22391100  | -2.87404700 |
| H | -0.34635400 | 3.65526300  | -0.94986700 |
| C | 2.25668100  | 0.88821700  | -2.84602900 |
| H | 2.71900300  | 1.58609500  | -3.58084500 |
| H | 3.09492700  | 0.39257900  | -2.31770000 |
| H | 1.69585000  | 0.12969300  | -3.42851400 |
| H | -1.88468900 | 2.80313000  | -1.56380100 |

#### TS<sub>1-2Zr</sub> syn-S/trans-S

E: -1010.27631252 A.U.

|    |             |             |             |
|----|-------------|-------------|-------------|
| Zr | -0.16458200 | 0.78887000  | -0.23999800 |
| N  | -2.18482600 | -0.39425500 | -0.22876900 |
| N  | 0.24989200  | -1.14591900 | 0.01850800  |
| C  | -2.06619300 | -1.74998400 | -0.09554700 |
| C  | -3.19591400 | -2.58714100 | -0.08882400 |
| H  | -3.06644200 | -3.67546000 | 0.01538400  |
| C  | -4.47271200 | -2.02403700 | -0.21574800 |
| H  | -5.36800800 | -2.66512500 | -0.21376000 |
| C  | -4.59171300 | -0.62701400 | -0.34786100 |
| H  | -5.57356500 | -0.14176600 | -0.45209100 |
| C  | -3.42973500 | 0.14669000  | -0.35210700 |
| H  | -3.48987400 | 1.24169400  | -0.46472300 |
| C  | -0.65783000 | -2.27922900 | 0.03674500  |
| H  | -0.43438500 | -2.99261700 | -0.79250100 |
| C  | 1.67265000  | -1.19907500 | 0.16634400  |
| C  | 2.50957500  | -1.36249900 | -0.99722700 |
| C  | 3.90427900  | -1.28146000 | -0.82935800 |
| H  | 4.55924600  | -1.39203700 | -1.70842900 |
| C  | 4.47298200  | -1.09684500 | 0.44169900  |
| H  | 5.56764200  | -1.03683700 | 0.54717200  |
| C  | 3.65834200  | -1.03895400 | 1.58440700  |
| H  | 4.12233700  | -0.96424800 | 2.58089900  |

|   |             |             |             |
|---|-------------|-------------|-------------|
| C | 2.25676600  | -1.11838000 | 1.48260200  |
| C | 1.94702200  | -1.71984200 | -2.35167000 |
| H | 0.86945800  | -1.48966700 | -2.45697800 |
| C | 1.43072100  | -1.25799800 | 2.73964600  |
| H | 0.35533000  | -1.04486400 | 2.58527800  |
| H | 2.50379500  | -1.22775300 | -3.17501300 |
| H | 2.05899200  | -2.81363900 | -2.52177900 |
| H | 1.81533700  | -0.62077900 | 3.56204500  |
| H | 1.50093100  | -2.30453900 | 3.11105700  |
| C | -1.19098600 | 1.92885700  | 1.90792400  |
| H | -0.55090700 | -2.86832400 | 0.97842400  |
| H | -1.67512500 | 2.68963400  | 1.24959800  |
| C | 0.19797900  | 1.91838800  | 1.95236300  |
| C | 1.07161000  | 2.73236200  | 1.12548300  |
| C | 1.30466300  | 1.72001600  | -1.94232200 |
| H | 2.24741300  | 1.18789800  | -2.14681700 |
| C | 1.34192500  | 2.84225000  | -1.05305700 |
| H | 0.58213600  | 3.63167300  | -1.18976100 |
| C | 0.14234400  | 1.33786600  | -2.69520300 |
| H | 0.28451300  | 0.57069600  | -3.47543000 |
| C | -1.16084100 | 1.67965500  | -2.34645900 |
| H | -1.37656200 | 2.58174000  | -1.72866200 |
| H | -2.01752300 | 1.28835200  | -2.91491600 |
| H | 2.33884000  | 3.23173300  | -0.80223500 |
| H | 0.68237200  | 1.19231700  | 2.63051300  |
| H | 0.75013300  | 3.77932300  | 0.99948300  |
| C | -2.09060300 | 1.23664000  | 2.88254400  |
| H | -2.48305100 | 1.99298200  | 3.60097500  |
| H | -2.98213000 | 0.78735900  | 2.39937500  |
| H | -1.56194300 | 0.46378300  | 3.47478400  |
| H | 2.14289200  | 2.62328100  | 1.35362700  |

#### 2<sub>Zr</sub> syn-P/trans-P

E: -1010.30564380 A.U.

|    |             |             |             |
|----|-------------|-------------|-------------|
| Zr | -0.02414800 | 0.57696100  | -0.06206200 |
| N  | -1.55916000 | -1.17288700 | -0.26538700 |
| N  | 0.74527000  | -1.13136300 | 0.80060200  |
| C  | -1.23939200 | -2.35857900 | 0.34275600  |
| C  | -2.13190700 | -3.44401400 | 0.36245800  |
| H  | -1.84006300 | -4.37783900 | 0.86723900  |
| C  | -3.37406400 | -3.32801400 | -0.27444200 |
| H  | -4.08194300 | -4.17154900 | -0.27722600 |
| C  | -3.69383700 | -2.11924000 | -0.92174700 |
| H  | -4.65054700 | -1.98533200 | -1.44811800 |
| C  | -2.76840500 | -1.07581200 | -0.89391100 |
| H  | -2.98128300 | -0.12364900 | -1.39977100 |
| C  | 0.13436500  | -2.42985200 | 0.95837200  |
| H  | 0.71407700  | -3.25004700 | 0.48509400  |
| C  | 2.07861400  | -0.75777400 | 0.62163200  |
| C  | 3.11447600  | -1.50418000 | -0.04535400 |
| C  | 4.27780400  | -0.80565800 | -0.40246100 |
| H  | 5.08005100  | -1.36224900 | -0.91374800 |
| C  | 4.45735100  | 0.57927500  | -0.16724600 |
| H  | 5.38674000  | 1.07172200  | -0.49135800 |
| C  | 3.48476200  | 1.29561800  | 0.52092000  |
| H  | 3.65662300  | 2.35058000  | 0.78831400  |
| C  | 2.30345700  | 0.63779600  | 0.97444700  |
| C  | 2.99152200  | -2.96843700 | -0.39626000 |
| H  | 2.15583600  | -3.16176600 | -1.10313000 |
| C  | 1.45444900  | 1.30610900  | 2.03350700  |
| H  | 0.43416700  | 1.73901100  | 1.71881900  |

|   |             |             |             |
|---|-------------|-------------|-------------|
| H | 3.91638200  | -3.32479700 | -0.88820200 |
| H | 2.83927500  | -3.60516700 | 0.50037200  |
| H | 1.94812700  | 2.21921800  | 2.42077500  |
| H | 1.21689600  | 0.63027200  | 2.87829400  |
| C | -1.94212600 | 2.09134500  | 1.82882800  |
| H | 0.05630200  | -2.69892400 | 2.03903700  |
| H | -1.30800700 | 2.86705600  | 2.30530800  |
| C | -2.25494800 | 2.26080200  | 0.50576700  |
| C | -1.81724300 | 3.44122200  | -0.34800000 |
| C | -1.14657600 | 1.73173700  | -2.09022600 |
| H | -2.20139600 | 1.67960000  | -2.40951100 |
| C | -0.74727300 | 3.00442300  | -1.36954300 |
| H | 0.25103300  | 2.89590400  | -0.84480800 |
| C | -0.25827900 | 0.77354600  | -2.57815400 |
| H | -0.69154100 | -0.07373300 | -3.13980900 |
| C | 1.09873500  | 0.67896000  | -2.12902200 |
| H | 1.70705300  | 1.59893600  | -2.03230200 |
| H | 1.69202300  | -0.19359900 | -2.44876600 |
| H | -0.51138300 | 3.81049600  | -2.10389900 |
| H | -3.01427300 | 1.58175700  | 0.07460900  |
| H | -1.43539300 | 4.27004500  | 0.28273100  |
| C | -2.51258600 | 1.05768000  | 2.74938400  |
| H | -1.73212500 | 0.55487800  | 3.35914800  |
| H | -3.16942900 | 1.57120100  | 3.48816700  |
| H | -3.12411500 | 0.29721100  | 2.22573100  |
| H | -2.70332500 | 3.84038500  | -0.88726300 |

#### 2<sub>Zr</sub> syn-P/trans-S

E: -1010.30551365 A.U.

|    |             |             |             |
|----|-------------|-------------|-------------|
| Zr | -0.09169900 | 0.56369000  | -0.34080800 |
| N  | -2.18134900 | -0.45660900 | -0.24702200 |
| N  | 0.10386600  | -1.22230100 | 0.52780400  |
| C  | -2.21241800 | -1.70674500 | 0.31387700  |
| C  | -3.42247400 | -2.39566100 | 0.49948000  |
| H  | -3.41365000 | -3.40133500 | 0.94722600  |
| C  | -4.62643200 | -1.79314200 | 0.10817500  |
| H  | -5.58329400 | -2.32162600 | 0.24139900  |
| C  | -4.59217200 | -0.50609200 | -0.46105400 |
| H  | -5.51194100 | 0.00329900  | -0.78484500 |
| C  | -3.35646600 | 0.12181200  | -0.62806100 |
| H  | -3.29380900 | 1.11891100  | -1.09165600 |
| C  | -0.86901700 | -2.28174100 | 0.69948500  |
| H  | -0.63499600 | -3.17167100 | 0.06782200  |
| C  | 1.52973000  | -1.30527800 | 0.48923700  |
| C  | 2.19144200  | -1.81814300 | -0.68931300 |
| C  | 3.59584200  | -1.75987800 | -0.74172400 |
| H  | 4.11719900  | -2.14039900 | -1.63442200 |
| C  | 4.34119400  | -1.23927300 | 0.33003900  |
| H  | 5.44014500  | -1.20523800 | 0.26440400  |
| C  | 3.69982000  | -0.79480700 | 1.49748000  |
| H  | 4.30293700  | -0.44046500 | 2.34879600  |
| C  | 2.29719800  | -0.84258400 | 1.62105500  |
| C  | 1.42733400  | -2.47393000 | -1.81397900 |
| H  | 0.40150400  | -2.07261500 | -1.95228500 |
| C  | 1.66098900  | -0.54273900 | 2.95767100  |
| H  | 0.55644100  | -0.50698400 | 2.91145100  |
| H  | 1.96820200  | -2.38651300 | -2.77649200 |
| H  | 1.31603600  | -3.56357900 | -1.61654600 |
| H  | 2.04571300  | 0.39827500  | 3.40283500  |
| H  | 1.92743800  | -1.34721400 | 3.67755300  |
| C  | -0.62325700 | 2.22372400  | 1.93909600  |

|   |             |             |             |
|---|-------------|-------------|-------------|
| H | -0.88801500 | -2.65292200 | 1.75166000  |
| H | 0.13305200  | 1.68989900  | 2.54985100  |
| C | -0.20638300 | 2.81354500  | 0.76930600  |
| C | 1.23530700  | 2.90625300  | 0.28410200  |
| C | 1.52391000  | 1.46990900  | -1.94434200 |
| H | 2.53362300  | 1.03684500  | -2.04395800 |
| C | 1.45356800  | 2.84633100  | -1.27614700 |
| H | 0.68793700  | 3.48675500  | -1.76593500 |
| C | 0.50615200  | 0.90416100  | -2.73390500 |
| H | 0.77750800  | 0.03039500  | -3.35315900 |
| C | -0.87288900 | 1.14806600  | -2.51129200 |
| H | -1.18590400 | 2.16154800  | -2.16635300 |
| H | -1.62724700 | 0.62363900  | -3.11645000 |
| H | 2.43017200  | 3.33497100  | -1.46981100 |
| H | -0.94196400 | 3.42581500  | 0.20609000  |
| H | 1.90051100  | 2.18548000  | 0.82379300  |
| C | -1.98794200 | 2.33824800  | 2.53203600  |
| H | -2.37657300 | 1.35865600  | 2.87944000  |
| H | -1.91392400 | 2.96612200  | 3.45033400  |
| H | -2.71988000 | 2.81911400  | 1.85429400  |
| H | 1.60492200  | 3.90339700  | 0.61446000  |

#### 2<sub>Zr</sub> syn-S/trans-P

E: -1010.30630252 A.U.

|    |             |             |             |
|----|-------------|-------------|-------------|
| Zr | -0.01167000 | 0.57059400  | -0.01155300 |
| N  | -1.58712900 | -1.14640300 | -0.22655500 |
| N  | 0.73035600  | -1.17737300 | 0.81079700  |
| C  | -1.27699900 | -2.35850500 | 0.33223800  |
| C  | -2.18762200 | -3.42924300 | 0.33002500  |
| H  | -1.90280300 | -4.38501000 | 0.79624700  |
| C  | -3.43841700 | -3.27026500 | -0.27971600 |
| H  | -4.16024600 | -4.10164200 | -0.30041600 |
| C  | -3.74955200 | -2.03298600 | -0.87575000 |
| H  | -4.71368200 | -1.86395900 | -1.37796500 |
| C  | -2.80652500 | -1.00643100 | -0.82720900 |
| H  | -3.01631000 | -0.03097100 | -1.28798600 |
| C  | 0.10594000  | -2.47404800 | 0.91736600  |
| H  | 0.66601500  | -3.27735300 | 0.39391300  |
| C  | 2.06274800  | -0.81580200 | 0.61603500  |
| C  | 3.08305000  | -1.55113700 | -0.08842600 |
| C  | 4.24408300  | -0.84944700 | -0.44639700 |
| H  | 5.03435600  | -1.39635900 | -0.98594600 |
| C  | 4.43702400  | 0.52677100  | -0.17480500 |
| H  | 5.36362200  | 1.02247800  | -0.50203600 |
| C  | 3.48424800  | 1.22878700  | 0.55644600  |
| H  | 3.67230000  | 2.27196600  | 0.85718900  |
| C  | 2.30706300  | 0.56591500  | 1.01060600  |
| C  | 2.94885900  | -3.00653800 | -0.46983400 |
| H  | 2.11033500  | -3.18001800 | -1.17860400 |
| C  | 1.48412900  | 1.19584900  | 2.11649800  |
| H  | 0.46532300  | 1.64161600  | 1.83638600  |
| H  | 3.87009600  | -3.35893200 | -0.97136500 |
| H  | 2.79364100  | -3.66035500 | 0.41381200  |
| H  | 1.99371100  | 2.08905500  | 2.52871300  |
| H  | 1.26312500  | 0.48509800  | 2.93671600  |
| C  | -2.46854600 | 1.77023200  | 1.18841400  |
| H  | 0.04499000  | -2.79309700 | 1.98552000  |
| H  | -3.22496600 | 1.53320800  | 0.41619100  |
| C  | -1.60066900 | 2.79956100  | 0.93466500  |
| C  | -1.56289400 | 3.64307600  | -0.32595200 |
| C  | -1.12495400 | 1.76039900  | -1.98221600 |

|   |             |             |             |
|---|-------------|-------------|-------------|
| H | -2.19604500 | 1.76878900  | -2.24658800 |
| C | -0.59848900 | 3.04666300  | -1.37277500 |
| H | 0.42879000  | 2.91922800  | -0.91967400 |
| C | -0.31843400 | 0.74736300  | -2.50564800 |
| H | -0.82675000 | -0.08294000 | -3.02820500 |
| C | 1.04973400  | 0.57792700  | -2.12114000 |
| H | 1.71630600  | 1.45947500  | -2.05783100 |
| H | 1.57366300  | -0.33267800 | -2.45484500 |
| H | -0.38874600 | 3.77515700  | -2.19190400 |
| H | -0.94688600 | 3.13495800  | 1.76492500  |
| H | -2.57765000 | 3.72415800  | -0.76927100 |
| C | -2.61611500 | 1.06040000  | 2.50182600  |
| H | -3.57899300 | 1.37219400  | 2.96678500  |
| H | -2.68887900 | -0.04096700 | 2.38588300  |
| H | -1.81028200 | 1.30538100  | 3.22277400  |
| H | -1.24576700 | 4.67293200  | -0.06550700 |

#### 2<sub>Zr</sub> syn-S/trans-S

E: -1010.30614016 A.U.

|    |             |             |             |
|----|-------------|-------------|-------------|
| Zr | -0.15829800 | 0.56412800  | -0.18892600 |
| N  | -2.39357700 | -0.01211100 | 0.02308200  |
| N  | -0.28980900 | -1.41092400 | 0.07113100  |
| C  | -2.66351600 | -1.34229600 | 0.19482300  |
| C  | -3.97992000 | -1.80187500 | 0.36396300  |
| H  | -4.17075700 | -2.87881500 | 0.48937700  |
| C  | -5.03527900 | -0.87787100 | 0.37639000  |
| H  | -6.07293000 | -1.22082000 | 0.51179700  |
| C  | -4.75117600 | 0.49076200  | 0.20786500  |
| H  | -5.54978200 | 1.24732600  | 0.20591000  |
| C  | -3.42331500 | 0.88062400  | 0.02195600  |
| H  | -3.16797200 | 1.94039600  | -0.14810400 |
| C  | -1.45856400 | -2.26086000 | 0.19166100  |
| H  | -1.53699800 | -2.98925100 | -0.65050200 |
| C  | 1.06644200  | -1.64959300 | 0.40973300  |
| C  | 1.93713300  | -2.43771800 | -0.41436000 |
| C  | 3.29785500  | -2.48041200 | -0.06626500 |
| H  | 3.98631900  | -3.08883800 | -0.67437400 |
| C  | 3.80324300  | -1.75811700 | 1.03492700  |
| H  | 4.87678800  | -1.81317300 | 1.27407000  |
| C  | 2.95009900  | -0.99430000 | 1.84176300  |
| H  | 3.34916000  | -0.47634100 | 2.72833400  |
| C  | 1.56343900  | -0.94388000 | 1.56555400  |
| C  | 1.39771700  | -3.22246200 | -1.58050900 |
| H  | 0.61627500  | -2.66186700 | -2.13397600 |
| C  | 0.60694900  | -0.34574800 | 2.58113100  |
| H  | -0.18639500 | 0.35508000  | 2.19172100  |
| H  | 2.20061100  | -3.50210700 | -2.28892900 |
| H  | 0.92996300  | -4.17088100 | -1.23507100 |
| H  | 1.15059000  | 0.23125300  | 3.35262100  |
| H  | 0.02534000  | -1.14014200 | 3.09541200  |
| C  | 0.61428600  | 2.91340300  | 0.80966000  |
| H  | -1.42472600 | -2.87006100 | 1.12483500  |
| H  | 0.15449100  | 3.28925900  | -0.13422900 |
| C  | 1.89697000  | 2.43361400  | 0.74257200  |
| C  | 2.75925900  | 2.33665300  | -0.49146400 |
| C  | 1.43343600  | 0.79280100  | -2.07910100 |
| H  | 2.19388800  | 0.00042600  | -2.19726600 |
| C  | 2.01444100  | 2.18384000  | -1.83174500 |
| H  | 1.25543600  | 2.98353700  | -1.96715300 |
| C  | 0.16291700  | 0.52680500  | -2.63517200 |
| H  | 0.00772400  | -0.47040200 | -3.08617800 |

|   |             |            |             |
|---|-------------|------------|-------------|
| C | -0.99213200 | 1.28519400 | -2.32810600 |
| H | -0.90028100 | 2.37845500 | -2.15024000 |
| H | -1.96780700 | 0.97125500 | -2.72809300 |
| H | 2.74744800  | 2.35685600 | -2.65227900 |
| H | 2.39649100  | 2.18706500 | 1.69889000  |
| H | 3.38415600  | 3.26158400 | -0.50839100 |
| C | -0.13889700 | 3.24708800 | 2.07255800  |
| H | -0.23548400 | 4.35365300 | 2.14990300  |
| H | -1.18510800 | 2.86669200 | 2.08236600  |
| H | 0.38023500  | 2.89216000 | 2.98368200  |
| H | 3.49063500  | 1.50991500 | -0.36356000 |

|   |             |             |             |
|---|-------------|-------------|-------------|
| H | 1.25923300  | 1.07494600  | 3.10971200  |
| H | 0.97069600  | -0.77116400 | 3.31369400  |
| H | -2.85009300 | 2.80365600  | 1.32910700  |
| H | 0.69646700  | 3.71142100  | 0.34008500  |
| H | -1.54734000 | 3.26016600  | -0.61512700 |
| C | 2.02395900  | 1.73991700  | -2.28060900 |
| H | 2.46345800  | 2.50278400  | -2.96403500 |
| H | 2.76304000  | 0.91641800  | -2.22481400 |
| H | 1.10332100  | 1.36816900  | -2.77111500 |
| H | -0.82703100 | 2.19688400  | -1.94703700 |

### Zirconium - Path 3

#### 1<sub>Zr</sub> anti-P/trans-P

E: -1010.28331424 A.U.

|    |             |             |             |
|----|-------------|-------------|-------------|
| Zr | 0.13397100  | 0.77511800  | 0.35468200  |
| N  | 2.16287400  | -0.37496500 | 0.18306500  |
| N  | -0.17615000 | -0.83160300 | -0.79327500 |
| C  | 2.13556100  | -1.47970000 | -0.62231100 |
| C  | 3.28384600  | -2.26676600 | -0.82402100 |
| H  | 3.23207300  | -3.14595300 | -1.48465300 |
| C  | 4.47695500  | -1.92576500 | -0.17301600 |
| H  | 5.38342700  | -2.53478400 | -0.31432600 |
| C  | 4.49820500  | -0.79216700 | 0.66290900  |
| H  | 5.41286200  | -0.48582800 | 1.19195400  |
| C  | 3.32932400  | -0.04334400 | 0.80565500  |
| H  | 3.32017100  | 0.86292000  | 1.43361800  |
| C  | 0.80318900  | -1.79896300 | -1.26313100 |
| H  | 0.49538000  | -2.83990400 | -1.01288400 |
| C  | -1.58417300 | -1.03470200 | -0.65927000 |
| C  | -2.09509200 | -1.85418900 | 0.41636500  |
| C  | -3.48713400 | -1.91292900 | 0.60275500  |
| H  | -3.89590000 | -2.52573700 | 1.42246200  |
| C  | -4.36853500 | -1.22904000 | -0.25816800 |
| H  | -5.45507500 | -1.29245500 | -0.08868800 |
| C  | -3.87415600 | -0.51367600 | -1.35715900 |
| H  | -4.57640500 | -0.04227800 | -2.06313000 |
| C  | -2.48767400 | -0.42908000 | -1.60738600 |
| C  | -1.19681400 | -2.72184900 | 1.26898900  |
| H  | -0.16894500 | -2.32513200 | 1.38949400  |
| C  | -2.01312300 | 0.15059600  | -2.91522800 |
| H  | -0.91349100 | 0.25345300  | -2.96721500 |
| H  | -1.62959800 | -2.89440100 | 2.27481200  |
| H  | -1.09852100 | -3.72890800 | 0.80590100  |
| H  | -2.48643800 | 1.12882800  | -3.13758400 |
| H  | -2.31709900 | -0.52959800 | -3.74094900 |
| C  | 1.79535200  | 2.39567200  | -0.94396500 |
| H  | 0.89693000  | -1.77149700 | -2.37582800 |
| H  | 2.71285300  | 2.67768900  | -0.39613300 |
| C  | 0.61332500  | 3.02813600  | -0.52998100 |
| C  | -0.69384600 | 2.65533700  | -0.95278700 |
| C  | -1.31612000 | 1.69007700  | 2.35325500  |
| H  | -0.75307300 | 2.60192700  | 2.63682200  |
| C  | -2.46389600 | 1.81329600  | 1.61538800  |
| H  | -3.07606600 | 0.93462600  | 1.34299200  |
| C  | -0.76700300 | 0.39953400  | 2.76749200  |
| H  | -1.45281600 | -0.46563900 | 2.78131100  |
| C  | 0.56647700  | 0.21304700  | 3.03017700  |

#### TS<sub>1-2Zr</sub> anti-P/trans-P

E: -1010.25641046 A.U.

|    |             |             |             |
|----|-------------|-------------|-------------|
| Zr | 0.21168500  | 0.68879200  | 0.54062400  |
| N  | 2.18687700  | -0.46781600 | 0.21601300  |
| N  | -0.21403000 | -0.81395000 | -0.72331200 |
| C  | 2.11352700  | -1.48342500 | -0.69875600 |
| C  | 3.24676100  | -2.24769600 | -1.02757000 |
| H  | 3.16238000  | -3.05838300 | -1.76777400 |
| C  | 4.46827400  | -1.97885800 | -0.39384100 |
| H  | 5.36229700  | -2.57587000 | -0.63270300 |
| C  | 4.53403200  | -0.94212000 | 0.55749100  |
| H  | 5.47062600  | -0.70330700 | 1.08285000  |
| C  | 3.37697200  | -0.21088600 | 0.82994200  |
| H  | 3.39279200  | 0.61080600  | 1.56602900  |
| C  | 0.74805300  | -1.74697400 | -1.29611600 |
| H  | 0.44730400  | -2.80196000 | -1.09910600 |
| C  | -1.62650600 | -1.03380800 | -0.64153200 |
| C  | -2.15994700 | -1.93652300 | 0.35149700  |
| C  | -3.55689700 | -2.01179300 | 0.49809000  |
| H  | -3.98168800 | -2.68149300 | 1.26288200  |
| C  | -4.41801700 | -1.26633600 | -0.32651900 |
| H  | -5.50808400 | -1.34021200 | -0.18768800 |
| C  | -3.89714500 | -0.46730900 | -1.35668500 |
| H  | -4.58383300 | 0.05300800  | -2.04356400 |
| C  | -2.50780500 | -0.35774400 | -1.55958600 |
| C  | -1.28294100 | -2.85125800 | 1.17341000  |
| H  | -0.24865900 | -2.47901200 | 1.30272400  |
| C  | -2.00311300 | 0.34396000  | -2.79746300 |
| H  | -0.90389300 | 0.46705600  | -2.80573500 |
| H  | -1.71794400 | -3.04046300 | 2.17514300  |
| H  | -1.21208200 | -3.84584400 | 0.67936600  |
| H  | -2.48677400 | 1.33086500  | -2.95052800 |
| H  | -2.26289700 | -0.26176500 | -3.69303100 |
| C  | 1.79023800  | 2.55271200  | -0.99583100 |
| H  | 0.78963400  | -1.65131200 | -2.40828500 |
| H  | 2.78652100  | 2.79109600  | -0.57899700 |
| C  | 0.71112200  | 2.99856200  | -0.25416900 |
| C  | -0.72573500 | 2.78180200  | -0.53113700 |
| C  | -1.12760100 | 1.77453600  | 2.20318400  |
| H  | -0.41483900 | 2.47931600  | 2.68183200  |
| C  | -1.91441900 | 2.30543000  | 1.12251100  |
| H  | -2.69328100 | 1.66592300  | 0.66479300  |
| C  | -1.01287500 | 0.40617300  | 2.60264400  |
| H  | -1.85429200 | -0.28451500 | 2.40727600  |
| C  | 0.24480400  | -0.11758000 | 2.93651800  |
| H  | 1.05506400  | 0.57430600  | 3.25226400  |
| H  | 0.37344600  | -1.16530200 | 3.24619000  |
| H  | -2.22011700 | 3.35613200  | 1.22272700  |
| H  | 0.94999600  | 3.60143400  | 0.64487000  |
| H  | -1.29719400 | 3.72226600  | -0.51197400 |

|   |             |            |             |
|---|-------------|------------|-------------|
| C | 1.79708500  | 1.96968400 | -2.37148300 |
| H | 2.20414800  | 2.74765300 | -3.05955500 |
| H | 2.49686100  | 1.11294700 | -2.45776700 |
| H | 0.79997900  | 1.68305600 | -2.75464700 |
| H | -0.96999400 | 2.23093700 | -1.45902700 |

#### 1<sub>Zr</sub> anti-P/trans-S

E: -1010.28247989 A.U.

|    |             |             |             |
|----|-------------|-------------|-------------|
| Zr | -0.12907300 | 0.82931900  | -0.14644600 |
| N  | -2.13956300 | -0.36723700 | -0.21604500 |
| N  | 0.24922400  | -1.03025400 | 0.47462400  |
| C  | -2.05990400 | -1.65755800 | 0.22982500  |
| C  | -3.19166700 | -2.49266100 | 0.25661800  |
| H  | -3.09796700 | -3.52530900 | 0.62679100  |
| C  | -4.42310200 | -2.00045200 | -0.19552800 |
| H  | -5.31784400 | -2.64229500 | -0.18543400 |
| C  | -4.49835300 | -0.67353200 | -0.66225400 |
| H  | -5.44453500 | -0.24556900 | -1.02551800 |
| C  | -3.34187200 | 0.10750300  | -0.64900000 |
| H  | -3.36922700 | 1.15603100  | -0.98884600 |
| C  | -0.69086700 | -2.12184200 | 0.67336100  |
| H  | -0.38602100 | -3.02694200 | 0.09798400  |
| C  | 1.66783100  | -1.15323800 | 0.31554700  |
| C  | 2.20762500  | -1.55824900 | -0.96132100 |
| C  | 3.60341600  | -1.55209400 | -1.12787800 |
| H  | 4.03269500  | -1.85022900 | -2.09796200 |
| C  | 4.45910000  | -1.20132100 | -0.06772100 |
| H  | 5.54955100  | -1.20374900 | -0.22256000 |
| C  | 3.93467600  | -0.89268100 | 1.19574500  |
| H  | 4.61826200  | -0.67985100 | 2.03307600  |
| C  | 2.54430500  | -0.88867800 | 1.42729700  |
| C  | 1.33391800  | -2.07787800 | -2.08107800 |
| H  | 0.26755500  | -1.79182700 | -1.97986700 |
| C  | 2.03723000  | -0.73498300 | 2.83889500  |
| H  | 0.93638800  | -0.64623400 | 2.89531100  |
| H  | 1.69981300  | -1.75460500 | -3.07716100 |
| H  | 1.36129900  | -3.18986900 | -2.09631100 |
| H  | 2.50119900  | 0.12954500  | 3.35720700  |
| H  | 2.32162700  | -1.63230000 | 3.43071700  |
| C  | -1.72532100 | 1.92204700  | 1.70705000  |
| H  | -0.72078300 | -2.44198800 | 1.74308500  |
| H  | -2.69148200 | 2.30816600  | 1.33411400  |
| C  | -0.59909900 | 2.69780300  | 1.40325100  |
| C  | 0.75556400  | 2.28619600  | 1.58145200  |
| C  | 1.35489700  | 1.74447200  | -2.02569400 |
| H  | 1.91415200  | 0.84031700  | -2.33149800 |
| C  | 1.95037400  | 2.64962900  | -1.18115200 |
| H  | 1.47565600  | 3.61827800  | -0.95008900 |
| C  | -0.01275200 | 1.91744700  | -2.52460300 |
| H  | -0.46940200 | 2.92107600  | -2.40382100 |
| C  | -0.76570400 | 0.90317700  | -3.05204100 |
| H  | -1.80284300 | 1.07452600  | -3.38094600 |
| H  | -0.33441300 | -0.09227000 | -3.25414000 |
| H  | 2.97332300  | 2.48961400  | -0.80553000 |
| H  | -0.77789200 | 3.60522600  | 0.79049000  |
| H  | 1.55536000  | 3.02307300  | 1.41834500  |
| C  | -1.83012400 | 0.89337900  | 2.80046100  |
| H  | -2.27400100 | 1.39299400  | 3.69230200  |
| H  | -2.52033700 | 0.06634000  | 2.54025800  |
| H  | -0.85909500 | 0.47118400  | 3.12232100  |
| H  | 0.99322500  | 1.53742900  | 2.35808100  |

#### TS<sub>1-2Zr</sub> anti-P/trans-S

E: -1010.26860777 A.U.

|    |             |             |             |
|----|-------------|-------------|-------------|
| Zr | 0.09826900  | 0.70877000  | 0.40934600  |
| N  | 2.14984700  | -0.39845000 | 0.23557300  |
| N  | -0.14482500 | -0.80317000 | -0.88979300 |
| C  | 2.19734200  | -1.37334200 | -0.72339800 |
| C  | 3.39115000  | -2.06086000 | -1.00551900 |
| H  | 3.40132900  | -2.84010100 | -1.78329400 |
| C  | 4.55146600  | -1.75409100 | -0.28103300 |
| H  | 5.49199400  | -2.29020100 | -0.48269800 |
| C  | 4.49497300  | -0.75621200 | 0.71117500  |
| H  | 5.38052200  | -0.48706800 | 1.30590200  |
| C  | 3.28148300  | -0.10322600 | 0.93505400  |
| H  | 3.20169300  | 0.68574800  | 1.70156100  |
| C  | 0.89244500  | -1.66950300 | -1.43306200 |
| H  | 0.62757800  | -2.74447200 | -1.31685500 |
| C  | -1.52092500 | -1.13769300 | -0.69362400 |
| C  | -1.90225500 | -2.13778900 | 0.27630400  |
| C  | -3.26659900 | -2.27853600 | 0.57841400  |
| H  | -3.57650600 | -3.02401800 | 1.32821700  |
| C  | -4.24493400 | -1.49147500 | -0.06200600 |
| H  | -5.30619300 | -1.61684200 | 0.20442100  |
| C  | -3.87829800 | -0.58670200 | -1.06653600 |
| H  | -4.65728600 | -0.02987500 | -1.61166300 |
| C  | -2.52518000 | -0.41452600 | -1.43172500 |
| C  | -0.90497000 | -3.06945900 | 0.92874000  |
| H  | 0.11496000  | -2.64714900 | 1.02725800  |
| C  | -2.19990700 | 0.39000800  | -2.66701000 |
| H  | -1.11382800 | 0.54325400  | -2.80461400 |
| H  | -1.24859500 | -3.38510500 | 1.93392700  |
| H  | -0.80751000 | -4.00331700 | 0.33139100  |
| H  | -2.72100400 | 1.36946700  | -2.68443000 |
| H  | -2.56262800 | -0.16115800 | -3.56196400 |
| C  | 1.63405700  | 2.48848600  | -0.99889100 |
| H  | 1.00891300  | -1.50930600 | -2.53254000 |
| H  | 2.65443900  | 2.62816600  | -0.59745600 |
| C  | 0.61214100  | 3.04855900  | -0.24515100 |
| C  | -0.83118000 | 2.91609300  | -0.45485400 |
| C  | -1.64650800 | 1.10133000  | 1.92991600  |
| H  | -2.28962900 | 0.21704200  | 1.76143300  |
| C  | -1.94873000 | 2.34202700  | 1.28085500  |
| H  | -1.62334700 | 3.26294800  | 1.79381300  |
| C  | -0.50802300 | 0.99336900  | 2.81588400  |
| H  | -0.09147500 | 1.93261700  | 3.23473000  |
| C  | 0.24477700  | -0.16230500 | 2.92532800  |
| H  | 1.15918100  | -0.19518600 | 3.53757600  |
| H  | -0.15748700 | -1.13710500 | 2.59025600  |
| H  | -2.91621100 | 2.42740100  | 0.76198300  |
| H  | 0.91941200  | 3.60360400  | 0.66470100  |
| H  | -1.39656300 | 3.84220200  | -0.27155400 |
| C  | 1.56814500  | 1.97442600  | -2.40575500 |
| H  | 2.05821700  | 2.73739500  | -3.05500200 |
| H  | 2.16100100  | 1.04750200  | -2.54625400 |
| H  | 0.54363500  | 1.82800900  | -2.79580400 |
| H  | -1.16333600 | 2.45459900  | -1.40599400 |

#### 1<sub>Zr</sub> anti-S/trans-A

E: -1010.29331385 A.U.

|    |            |            |            |
|----|------------|------------|------------|
| Zr | 0.20840100 | 0.81967400 | 0.06615500 |
|----|------------|------------|------------|

|   |             |             |             |
|---|-------------|-------------|-------------|
| N | 2.19662700  | -0.47554200 | 0.03964200  |
| N | -0.22908300 | -1.01892700 | -0.58860100 |
| C | 2.06509400  | -1.71467500 | -0.52254600 |
| C | 3.16237900  | -2.58297600 | -0.65931800 |
| H | 3.01992300  | -3.57033200 | -1.12504300 |
| C | 4.42086300  | -2.18360100 | -0.19054100 |
| H | 5.29068700  | -2.85209200 | -0.28530300 |
| C | 4.54955200  | -0.91828900 | 0.41211400  |
| H | 5.51395900  | -0.56600800 | 0.80726700  |
| C | 3.42208000  | -0.09960000 | 0.50244800  |
| H | 3.49752300  | 0.89640400  | 0.96513800  |
| C | 0.67041100  | -2.09755300 | -0.95866400 |
| H | 0.36701100  | -3.05677600 | -0.47974400 |
| C | -1.63558000 | -1.14950100 | -0.36321400 |
| C | -2.10514800 | -1.71682200 | 0.88010500  |
| C | -3.48756800 | -1.71399300 | 1.13061700  |
| H | -3.86486400 | -2.13398700 | 2.07684500  |
| C | -4.39964900 | -1.21063700 | 0.18153500  |
| H | -5.47827800 | -1.21704100 | 0.40447500  |
| C | -3.94648700 | -0.75148900 | -1.06248700 |
| H | -4.67479100 | -0.42752000 | -1.82313900 |
| C | -2.57139600 | -0.74248800 | -1.38063000 |
| C | -1.17642200 | -2.39490800 | 1.86200700  |
| H | -0.13310600 | -2.02379300 | 1.82142800  |
| C | -2.15341500 | -0.43890000 | -2.79747500 |
| H | -1.05796500 | -0.45382500 | -2.94048700 |
| H | -1.54621400 | -2.30609100 | 2.90354100  |
| H | -1.13610000 | -3.48645900 | 1.64938800  |
| H | -2.55441200 | 0.53176700  | -3.15594600 |
| H | -2.58419700 | -1.20985000 | -3.47232400 |
| C | 1.59206500  | 1.98747600  | -1.54695900 |
| H | 0.64363600  | -2.28986400 | -2.05854800 |
| H | 2.39987100  | 1.47756900  | -2.09410600 |
| C | 0.30957600  | 2.02537100  | -2.13750800 |
| C | -0.81954700 | 2.52063000  | -1.45902300 |
| C | -1.16163600 | 2.10936500  | 1.94595500  |
| H | -0.69413200 | 3.11058300  | 2.02080600  |
| C | -2.33407100 | 1.96667200  | 1.25002800  |
| H | -2.86571500 | 0.99939000  | 1.19922400  |
| C | -0.46026400 | 0.98616100  | 2.56447700  |
| H | -1.03023900 | 0.05048200  | 2.70784600  |
| C | 0.87043800  | 1.01795300  | 2.89886600  |
| H | 1.44516400  | 1.96116900  | 2.88657300  |
| H | 1.37318000  | 0.13335900  | 3.32067000  |
| H | -2.82384200 | 2.83510600  | 0.78271400  |
| H | 0.16357600  | 1.43323400  | -3.05713500 |
| H | -0.70162700 | 3.36493400  | -0.75424500 |
| C | 1.98737800  | 2.87909500  | -0.39340900 |
| H | 1.78304300  | 2.46124600  | 0.65240300  |
| H | 3.08226100  | 3.04251600  | -0.37025600 |
| H | 1.48091200  | 3.86698100  | -0.40509800 |
| H | -1.81606100 | 2.43949600  | -1.91869600 |

#### TS<sub>1-2Zr</sub> anti-S/trans-P

E: -1010.26158638 A.U.

|    |             |             |             |
|----|-------------|-------------|-------------|
| Zr | 0.23267500  | 0.73715100  | 0.14198100  |
| N  | 2.27563800  | -0.41508500 | 0.03052200  |
| N  | -0.12974500 | -1.15105200 | -0.42675000 |
| C  | 2.20224100  | -1.69235900 | -0.45567100 |
| C  | 3.35316600  | -2.47523000 | -0.64885200 |
| H  | 3.25514500  | -3.49713000 | -1.04648700 |

|   |             |             |             |
|---|-------------|-------------|-------------|
| C | 4.60938300  | -1.94868700 | -0.32052100 |
| H | 5.52122300  | -2.54978100 | -0.46081200 |
| C | 4.68215400  | -0.64496600 | 0.20476300  |
| H | 5.64358300  | -0.19500000 | 0.49348200  |
| C | 3.50131800  | 0.08160100  | 0.36482100  |
| H | 3.52930000  | 1.09766400  | 0.78684000  |
| C | 0.81294800  | -2.21030100 | -0.73525100 |
| H | 0.61523600  | -3.12036500 | -0.12087500 |
| C | -1.54150600 | -1.30677800 | -0.27612800 |
| C | -2.07898000 | -1.76925800 | 0.98149700  |
| C | -3.47479200 | -1.74894800 | 1.15466100  |
| H | -3.90421200 | -2.07856600 | 2.11425400  |
| C | -4.32971000 | -1.34064500 | 0.11477200  |
| H | -5.41921200 | -1.32996000 | 0.27623400  |
| C | -3.80693800 | -0.99848800 | -1.14330800 |
| H | -4.49320400 | -0.75582200 | -1.97058400 |
| C | -2.41802900 | -1.00399800 | -1.37956600 |
| C | -1.20186300 | -2.34867700 | 2.06694700  |
| H | -0.15623400 | -1.98274500 | 2.03709100  |
| C | -1.90966500 | -0.82053500 | -2.78955500 |
| H | -0.81029400 | -0.71283500 | -2.84916600 |
| H | -1.61842900 | -2.16166600 | 3.07729900  |
| H | -1.15717600 | -3.45528100 | 1.95743200  |
| H | -2.39255800 | 0.03765900  | -3.30135400 |
| H | -2.17828900 | -1.71684700 | -3.39064900 |
| C | 1.12033000  | 2.21704500  | -1.60014700 |
| H | 0.72351000  | -2.53961500 | -1.79831500 |
| H | 1.81418700  | 1.75505600  | -2.32191900 |
| C | -0.25068400 | 2.11412800  | -1.86372000 |
| C | -1.33006500 | 2.72196100  | -1.09380400 |
| C | -1.12298100 | 2.18592800  | 1.69143900  |
| H | -0.60787200 | 3.15765800  | 1.83248200  |
| C | -2.13701200 | 2.15305000  | 0.67736500  |
| H | -2.69082200 | 1.20737900  | 0.51574500  |
| C | -0.56918700 | 1.07252900  | 2.39029300  |
| H | -1.18716700 | 0.16017700  | 2.48862600  |
| C | 0.79358100  | 1.01091100  | 2.71526400  |
| H | 1.39208600  | 1.93689800  | 2.77875100  |
| H | 1.21199700  | 0.12908300  | 3.22402400  |
| H | -2.78286700 | 3.04062500  | 0.58771400  |
| H | -0.54693000 | 1.49330000  | -2.72616100 |
| H | -1.09759600 | 3.72820600  | -0.70247400 |
| C | 1.70291500  | 3.00502100  | -0.46066700 |
| H | 1.80739200  | 2.41970600  | 0.52034500  |
| H | 2.74863500  | 3.30735800  | -0.66566800 |
| H | 1.11193200  | 3.90551400  | -0.19199600 |
| H | -2.29937500 | 2.67643900  | -1.61729700 |

#### 1<sub>Zr</sub> anti-S/trans-S

E: -1010.29055005 A.U.

|    |             |             |             |
|----|-------------|-------------|-------------|
| Zr | 0.23002000  | 0.80773700  | -0.02034100 |
| N  | 2.19533800  | -0.51649900 | 0.01992600  |
| N  | -0.30069600 | -1.12385600 | -0.08270700 |
| C  | 1.98218100  | -1.86408400 | -0.07301900 |
| C  | 3.04869500  | -2.78052100 | -0.06570500 |
| H  | 2.83944100  | -3.85841300 | -0.14600100 |
| C  | 4.36334300  | -2.30991500 | 0.04725200  |
| H  | 5.21034100  | -3.01352300 | 0.05378300  |
| C  | 4.58015600  | -0.92365100 | 0.15860400  |
| H  | 5.59349400  | -0.50710300 | 0.25858400  |
| C  | 3.47727800  | -0.06806100 | 0.14008600  |

|   |             |             |             |
|---|-------------|-------------|-------------|
| H | 3.61906400  | 1.01968800  | 0.22953700  |
| C | 0.54219900  | -2.30291600 | -0.17082400 |
| H | 0.30222800  | -3.02842100 | 0.64278500  |
| C | -1.73574300 | -1.15221300 | -0.06996200 |
| C | -2.42957800 | -1.23336900 | 1.19141700  |
| C | -3.83178600 | -1.12430500 | 1.19029200  |
| H | -4.37701700 | -1.17292600 | 2.14661300  |
| C | -4.54824600 | -0.99564700 | -0.01219700 |
| H | -5.64602800 | -0.91049400 | 0.01086100  |
| C | -3.87628900 | -1.03201900 | -1.24337200 |
| H | -4.45464400 | -1.00654900 | -2.18083400 |
| C | -2.47339600 | -1.14333500 | -1.30696000 |
| C | -1.71820800 | -1.55655300 | 2.48594900  |
| H | -0.62420800 | -1.39099200 | 2.43948600  |
| C | -1.82506500 | -1.38678100 | -2.64934200 |
| H | -0.72272000 | -1.30186600 | -2.63422500 |
| H | -2.13431000 | -0.99366200 | 3.34713900  |
| H | -1.86717400 | -2.63127100 | 2.73129200  |
| H | -2.22937400 | -0.71368900 | -3.43314000 |
| H | -2.06593600 | -2.41907700 | -2.98617000 |
| C | 1.26733400  | 1.52258100  | -2.08216300 |
| H | 0.36945200  | -2.85750000 | -1.12436700 |
| H | 1.89636600  | 0.82548900  | -2.65755100 |
| C | -0.11355900 | 1.57392500  | -2.36895200 |
| C | -1.00870300 | 2.37943500  | -1.63730500 |
| C | -0.97101300 | 1.84891500  | 1.95613200  |
| H | -1.41761900 | 0.92880800  | 2.37250400  |
| C | -1.73591500 | 2.67173300  | 1.16161500  |
| H | -1.38216300 | 3.66974400  | 0.85700100  |
| C | 0.43235600  | 2.11922000  | 2.26747400  |
| H | 0.81356700  | 3.14212000  | 2.08228500  |
| C | 1.29727300  | 1.15015800  | 2.70351900  |
| H | 2.36022400  | 1.37307300  | 2.88741800  |
| H | 0.94395600  | 0.14074100  | 2.97859300  |
| H | -2.78179200 | 2.41791000  | 0.92803200  |
| H | -0.52186700 | 0.79521100  | -3.03315500 |
| H | -0.65974600 | 3.35574500  | -1.25882100 |
| C | 1.95989500  | 2.63070700  | -1.31735000 |
| H | 1.77238300  | 2.65441900  | -0.19470500 |
| H | 3.05940500  | 2.56829900  | -1.41588300 |
| H | 1.63214200  | 3.64011000  | -1.64931100 |
| H | -2.09002400 | 2.30731000  | -1.82977400 |

#### TS<sub>1-2Zr</sub> anti-S/trans-S

E: -1010.27668718

|    |             |             |             |
|----|-------------|-------------|-------------|
| Zr | 0.21815500  | 0.76260000  | 0.04313800  |
| N  | 2.26090500  | -0.43169000 | 0.01169400  |
| N  | -0.17260300 | -1.20092300 | 0.06870700  |
| C  | 2.14195900  | -1.79478800 | -0.01354300 |
| C  | 3.26970600  | -2.63325100 | -0.04905600 |
| H  | 3.13429800  | -3.72564500 | -0.06707500 |
| C  | 4.55108400  | -2.06713400 | -0.06043100 |
| H  | 5.44542900  | -2.70883200 | -0.09045800 |
| C  | 4.67357700  | -0.66551800 | -0.02479200 |
| H  | 5.65835200  | -0.17514600 | -0.02224200 |
| C  | 3.51324400  | 0.10933600  | 0.01537600  |
| H  | 3.58342200  | 1.20673100  | 0.06185900  |
| C  | 0.73327300  | -2.33252000 | 0.00913200  |
| H  | 0.59375700  | -3.01340500 | 0.88320000  |
| C  | -1.59874400 | -1.27920400 | -0.01317700 |
| C  | -2.38031200 | -1.35698100 | 1.19683600  |

|   |             |             |             |
|---|-------------|-------------|-------------|
| C | -3.78263800 | -1.31836900 | 1.08876400  |
| H | -4.39506100 | -1.36296600 | 2.00366500  |
| C | -4.41191100 | -1.26425700 | -0.16655000 |
| H | -5.51140800 | -1.23764500 | -0.22612300 |
| C | -3.65016200 | -1.29379300 | -1.34648400 |
| H | -4.16031100 | -1.31970600 | -2.32274200 |
| C | -2.24374800 | -1.33057800 | -1.30387300 |
| C | -1.75185300 | -1.58454600 | 2.55155700  |
| H | -0.66031600 | -1.40069400 | 2.56605200  |
| C | -1.47274800 | -1.54929700 | -2.58474400 |
| H | -0.40817500 | -1.25213600 | -2.52159600 |
| H | -2.23350200 | -0.97434200 | 3.34391600  |
| H | -1.90404600 | -2.64346400 | 2.85612000  |
| H | -1.94161200 | -1.02872500 | -3.44439100 |
| H | -1.49008500 | -2.63138100 | -2.84396100 |
| C | 0.59550900  | 1.60021200  | -2.19977200 |
| H | 0.54368200  | -2.95975300 | -0.89423900 |
| H | 0.91023700  | 0.86609700  | -2.95928000 |
| C | -0.77624700 | 1.79450700  | -1.98960200 |
| C | -1.32545500 | 2.75314200  | -1.05417800 |
| C | -0.95961200 | 1.73147600  | 1.81032700  |
| H | -1.30431400 | 0.80709900  | 2.30543900  |
| C | -1.85381100 | 2.45167900  | 0.94865700  |
| H | -1.84867100 | 3.55158300  | 1.01938800  |
| C | 0.35550600  | 2.25134000  | 2.13488000  |
| H | 0.56159400  | 3.31846200  | 1.92072000  |
| C | 1.40773600  | 1.44141300  | 2.49859900  |
| H | 2.41776700  | 1.85079700  | 2.65559700  |
| H | 1.24974100  | 0.38749400  | 2.79392900  |
| H | -2.85493700 | 2.01335300  | 0.81017600  |
| H | -1.47966900 | 1.12661700  | -2.51475900 |
| H | -0.70817100 | 3.65291800  | -0.88039600 |
| C | 1.63983400  | 2.53130700  | -1.63411800 |
| H | 1.72688600  | 2.53438400  | -0.49796100 |
| H | 2.65113900  | 2.28791100  | -2.00757700 |
| H | 1.41946400  | 3.59774400  | -1.86190200 |
| H | -2.38493200 | 2.99186700  | -1.23653100 |

#### 2<sub>Zr</sub> anti-P/trans-A

E: -1010.29626338 A.U.

|    |             |             |             |
|----|-------------|-------------|-------------|
| Zr | -0.12283800 | 0.43119000  | -0.02822000 |
| N  | -1.14887600 | -1.66885300 | -0.12660200 |
| N  | 1.09094700  | -0.98683200 | 0.86921900  |
| C  | -0.51302500 | -2.70665800 | 0.50478300  |
| C  | -1.08039100 | -3.99055300 | 0.56790800  |
| H  | -0.54422100 | -4.79531300 | 1.09407800  |
| C  | -2.31246100 | -4.23362500 | -0.05322200 |
| H  | -2.76653900 | -5.23638500 | -0.02093800 |
| C  | -2.95316000 | -3.17679300 | -0.72695100 |
| H  | -3.91521300 | -3.32115500 | -1.24061600 |
| C  | -2.34667300 | -1.92062300 | -0.73513000 |
| H  | -2.82695900 | -1.07855800 | -1.25491300 |
| C  | 0.83794700  | -2.39035900 | 1.09812400  |
| H  | 1.60752500  | -3.05843200 | 0.65823400  |
| C  | 2.26209900  | -0.30237700 | 0.54721300  |
| C  | 3.39189300  | -0.78704400 | -0.20667900 |
| C  | 4.29186500  | 0.17129600  | -0.69751900 |
| H  | 5.16134300  | -0.18174300 | -1.27553200 |
| C  | 4.12056900  | 1.56527500  | -0.51299300 |
| H  | 4.85454800  | 2.26548700  | -0.94035400 |
| C  | 3.05981000  | 2.03967800  | 0.25205600  |



|   |             |             |             |
|---|-------------|-------------|-------------|
| H | 2.96947800  | 3.11552700  | 0.47105800  |
| C | 2.14399700  | 1.12021200  | 0.84281500  |
| C | 3.62906500  | -2.24890000 | -0.50159700 |
| H | 2.80915000  | -2.69447800 | -1.10499600 |
| C | 1.22777100  | 1.60375400  | 1.94633700  |
| H | 0.10824200  | 1.72328300  | 1.70611300  |
| H | 4.56214500  | -2.37827400 | -1.08195400 |
| H | 3.74052600  | -2.85045800 | 0.42511800  |
| H | 1.48575800  | 2.63779400  | 2.24882200  |
| H | 1.24237200  | 0.94274100  | 2.83508500  |
| C | -2.30914900 | 1.30952400  | 1.83520300  |
| H | 0.83285100  | -2.61193100 | 2.19231900  |
| H | -2.37673100 | 0.30351400  | 2.29433900  |
| C | -2.68867500 | 1.41933600  | 0.51595800  |
| C | -2.86670700 | 2.69670300  | -0.28209100 |
| C | -1.70295700 | 1.42820600  | -2.10378600 |
| H | -1.97402000 | 0.39927100  | -2.41335400 |
| C | -2.83060500 | 2.39261600  | -1.79747100 |
| H | -2.71931100 | 3.33312600  | -2.37680000 |
| C | -0.36149300 | 1.76634600  | -2.19392600 |
| H | -0.07275200 | 2.83026300  | -2.06907400 |
| C | 0.68518000  | 0.77723500  | -2.15370200 |
| H | 0.43584300  | -0.22930400 | -2.56558900 |
| H | 1.73221400  | 1.07709100  | -2.32410600 |
| H | -3.79480600 | 1.94620600  | -2.11526700 |
| H | -3.11798500 | 0.50580600  | 0.06465900  |
| H | -3.82392700 | 3.18679300  | 0.01084200  |
| C | -2.04477800 | 2.44271900  | 2.78133500  |
| H | -2.99124100 | 2.63532700  | 3.33901200  |
| H | -1.29430500 | 2.19238100  | 3.55731400  |
| H | -1.77175300 | 3.39313900  | 2.28245600  |
| H | -2.07394600 | 3.43466200  | -0.02545700 |

#### 2<sub>Zr</sub> anti-P/trans-S

E: -1010.29594960 A.U.

|    |             |             |             |
|----|-------------|-------------|-------------|
| Zr | 0.05628300  | 0.54114900  | 0.04737200  |
| N  | 2.28116400  | -0.11160100 | 0.13873800  |
| N  | 0.20605900  | -1.32237700 | -0.69382200 |
| C  | 2.57561400  | -1.31376000 | -0.45156700 |
| C  | 3.90095400  | -1.76887000 | -0.55147900 |
| H  | 4.10995300  | -2.73580300 | -1.03462000 |
| C  | 4.94044500  | -0.99219100 | -0.01947200 |
| H  | 5.98315900  | -1.34103100 | -0.08072500 |
| C  | 4.63083500  | 0.23158100  | 0.60408200  |
| H  | 5.41414300  | 0.86608100  | 1.04462200  |
| C  | 3.29530200  | 0.63376500  | 0.66312100  |
| H  | 3.01406300  | 1.57928300  | 1.15470200  |
| C  | 1.39113200  | -2.11139900 | -0.95805500 |
| H  | 1.35845400  | -3.10666000 | -0.45919900 |
| C  | -1.15401200 | -1.67790800 | -0.51128300 |
| C  | -1.58709200 | -2.50692100 | 0.59238400  |
| C  | -2.96418500 | -2.59051800 | 0.85188800  |
| H  | -3.31262300 | -3.21431800 | 1.69056800  |
| C  | -3.90815900 | -1.89030000 | 0.07121600  |
| H  | -4.97969800 | -1.96815500 | 0.31345000  |
| C  | -3.49400900 | -1.13353200 | -1.03039100 |
| H  | -4.24456900 | -0.64615700 | -1.67320900 |
| C  | -2.12396400 | -1.04232800 | -1.37503200 |
| C  | -0.61304100 | -3.30654200 | 1.42179700  |
| H  | 0.34425500  | -2.77859800 | 1.60628300  |
| C  | -1.75262900 | -0.44601300 | -2.71851800 |

|   |             |             |             |
|---|-------------|-------------|-------------|
| H | -0.66103200 | -0.37950900 | -2.88421400 |
| H | -1.05116600 | -3.58137200 | 2.40054200  |
| H | -0.36214200 | -4.26144200 | 0.90808800  |
| H | -2.21955700 | 0.54618500  | -2.89044700 |
| H | -2.15076100 | -1.10491100 | -3.52117700 |
| C | 0.77045800  | 2.98184100  | -0.75510000 |
| H | 1.50834100  | -2.32534300 | -2.04803700 |
| H | 1.78393000  | 3.28691200  | -0.43769300 |
| C | -0.28616200 | 3.43282200  | -0.00724000 |
| C | -1.75966400 | 3.21614400  | -0.23733800 |
| C | -1.85637200 | 1.32590300  | 1.46862100  |
| H | -2.41745200 | 0.38313300  | 1.29915400  |
| C | -2.48427500 | 2.63495600  | 1.01658600  |
| H | -2.43834200 | 3.38060900  | 1.83994100  |
| C | -0.73071000 | 1.30701700  | 2.30636300  |
| H | -0.35343900 | 2.27844400  | 2.68238900  |
| C | 0.15732800  | 0.19874100  | 2.38492000  |
| H | 1.05402600  | 0.25509600  | 3.02110700  |
| H | -0.26897400 | -0.82234100 | 2.29289600  |
| H | -3.55702300 | 2.50077900  | 0.77549900  |
| H | -0.03271000 | 4.04046800  | 0.88161600  |
| H | -2.21094400 | 4.20452800  | -0.49034000 |
| C | 0.69027600  | 2.24799800  | -2.07651600 |
| H | 1.31345100  | 2.77770600  | -2.83064300 |
| H | 1.16797300  | 1.22608600  | -2.07347000 |
| H | -0.33048000 | 2.17087700  | -2.49904200 |
| H | -1.95114500 | 2.57840900  | -1.13124200 |

#### 2<sub>Zr</sub> anti-S/trans-P

E: -1010.30394177 A.U.

|    |             |             |             |
|----|-------------|-------------|-------------|
| Zr | 0.24747000  | 0.67888000  | 0.09322800  |
| N  | 2.49751900  | 0.18896800  | -0.03170000 |
| N  | 0.42398100  | -1.29826800 | 0.14522200  |
| C  | 2.80964100  | -1.14600100 | 0.02552700  |
| C  | 4.14384200  | -1.57986500 | -0.02532000 |
| H  | 4.37006800  | -2.65610500 | 0.02444900  |
| C  | 5.17435400  | -0.63415600 | -0.13701600 |
| H  | 6.22536600  | -0.96070000 | -0.17827700 |
| C  | 4.84984800  | 0.73498200  | -0.19030200 |
| H  | 5.62855600  | 1.50765700  | -0.27194500 |
| C  | 3.50543100  | 1.10388000  | -0.13007600 |
| H  | 3.21608100  | 2.16856000  | -0.15405900 |
| C  | 1.63831300  | -2.09632900 | 0.15396000  |
| H  | 1.72968600  | -2.69093500 | 1.09469800  |
| C  | -0.92772100 | -1.74418200 | 0.01215200  |
| C  | -1.74064000 | -1.92460300 | 1.19007100  |
| C  | -3.10618300 | -2.23083100 | 1.01211700  |
| H  | -3.74701500 | -2.36115000 | 1.89874100  |
| C  | -3.64653600 | -2.41573000 | -0.26869700 |
| H  | -4.71346000 | -2.66526900 | -0.38119800 |
| C  | -2.82768400 | -2.32647500 | -1.41103600 |
| H  | -3.25733700 | -2.52833700 | -2.40536000 |
| C  | -1.46227300 | -2.01165600 | -1.30233400 |
| C  | -1.15417100 | -1.93874500 | 2.58060600  |
| H  | -0.17547700 | -1.42949400 | 2.65197300  |
| C  | -0.58384600 | -2.05481200 | -2.53105700 |
| H  | 0.32898700  | -1.42993500 | -2.44696100 |
| H  | -1.84825200 | -1.50302600 | 3.32717800  |
| H  | -0.99398000 | -2.99422400 | 2.89449300  |
| H  | -1.13763700 | -1.75516900 | -3.44297300 |
| H  | -0.23659800 | -3.09653700 | -2.71151500 |

|   |             |             |             |
|---|-------------|-------------|-------------|
| C | -1.00273100 | 1.51861100  | -1.96237800 |
| H | 1.64660400  | -2.83841700 | -0.67862600 |
| H | -0.81076200 | 0.58057100  | -2.52034300 |
| C | -2.20876400 | 1.59920500  | -1.30334800 |
| C | -2.85390300 | 2.78673600  | -0.63693600 |
| C | -1.34938200 | 2.39311500  | 1.26393200  |
| H | -0.65905700 | 3.15705600  | 0.83020300  |
| C | -2.79669100 | 2.60618400  | 0.89684000  |
| H | -3.41966200 | 1.74750900  | 1.22527500  |
| C | -0.78920800 | 1.55119900  | 2.21738900  |
| H | -1.44771300 | 0.85537200  | 2.76896700  |
| C | 0.63708700  | 1.36740400  | 2.27006700  |
| H | 1.26310900  | 2.26855800  | 2.07912100  |
| H | 1.07545500  | 0.68738200  | 3.01822700  |
| H | -3.20309100 | 3.50774400  | 1.40809300  |
| H | -2.80625700 | 0.66612900  | -1.28561800 |
| H | -2.35581000 | 3.73563300  | -0.92556200 |
| C | 0.01052700  | 2.61915400  | -2.16257600 |
| H | 1.03280600  | 2.35667500  | -1.75750300 |
| H | 0.22093900  | 2.76799500  | -3.24419800 |
| H | -0.28437300 | 3.59089200  | -1.72329500 |
| H | -3.90633400 | 2.85893700  | -0.98725700 |

|   |             |            |             |
|---|-------------|------------|-------------|
| C | 1.43724100  | 1.26784600 | -1.78485400 |
| H | 1.39655600  | 0.29461900 | -2.31220500 |
| C | 2.81995500  | 1.77923400 | -1.40862400 |
| H | 3.27327000  | 2.32621900 | -2.26628200 |
| C | 0.31074500  | 2.10519400 | -1.91492700 |
| H | 0.41709200  | 3.17158000 | -1.63539700 |
| C | -1.00429600 | 1.60339500 | -2.03761500 |
| H | -1.85704200 | 2.30140000 | -2.05040800 |
| H | -1.17778000 | 0.64441300 | -2.56339900 |
| H | 3.48882600  | 0.91405200 | -1.21861900 |
| H | 2.89618000  | 1.11723400 | 1.38289300  |
| H | 2.21687400  | 3.62372200 | -0.35974400 |
| C | 0.05416300  | 3.22095400 | 1.49362600  |
| H | -0.97338200 | 2.81368800 | 1.26765700  |
| H | -0.11428900 | 3.79544600 | 2.43007600  |
| H | 0.31559800  | 3.93407800 | 0.68973600  |
| H | 3.82728000  | 3.01699100 | 0.08050300  |

#### Zirconium - Path 4

#### 2Zr anti-S/trans-S

E: -1010.30928468 A.U.

|    |             |             |             |
|----|-------------|-------------|-------------|
| Zr | -0.17470600 | 0.61997700  | 0.01751200  |
| N  | -2.44365400 | 0.07383700  | 0.08475200  |
| N  | -0.34286000 | -1.31903500 | -0.39933700 |
| C  | -2.73486600 | -1.23185100 | -0.20521300 |
| C  | -4.05966300 | -1.69904600 | -0.21635300 |
| H  | -4.26511600 | -2.75181300 | -0.46457500 |
| C  | -5.10482900 | -0.81696600 | 0.09464000  |
| H  | -6.14846600 | -1.16832700 | 0.09480300  |
| C  | -4.80072900 | 0.52262500  | 0.40115000  |
| H  | -5.58922800 | 1.24915400  | 0.64725800  |
| C  | -3.46500200 | 0.92849600  | 0.37510400  |
| H  | -3.19681000 | 1.97796000  | 0.58120600  |
| C  | -1.54779500 | -2.12821400 | -0.49970300 |
| H  | -1.65273300 | -2.57964800 | -1.51524800 |
| C  | 0.94545500  | -1.72417400 | 0.06225800  |
| C  | 1.94421500  | -2.21261600 | -0.84418100 |
| C  | 3.21876600  | -2.49646600 | -0.31866100 |
| H  | 4.00093200  | -2.88454600 | -0.99066400 |
| C  | 3.51156000  | -2.30416000 | 1.04470800  |
| H  | 4.51903300  | -2.53876500 | 1.42277000  |
| C  | 2.52965600  | -1.83432500 | 1.93158400  |
| H  | 2.76484600  | -1.71848800 | 3.00155600  |
| C  | 1.22756500  | -1.55730500 | 1.46622900  |
| C  | 1.62154900  | -2.48533800 | -2.28935900 |
| H  | 0.76882200  | -1.87941100 | -2.65516900 |
| C  | 0.12112200  | -1.22114700 | 2.44725300  |
| H  | -0.57919000 | -0.38658800 | 2.15437800  |
| H  | 2.49794600  | -2.31092100 | -2.94403000 |
| H  | 1.33726500  | -3.55283600 | -2.42395400 |
| H  | 0.52701600  | -0.93680100 | 3.43683800  |
| H  | -0.56149100 | -2.08482900 | 2.59913300  |
| C  | 1.08665800  | 2.14243300  | 1.72026900  |
| H  | -1.51900600 | -2.98594900 | 0.21191200  |
| H  | 0.95264000  | 1.53736900  | 2.63781300  |
| C  | 2.25317700  | 1.94269000  | 1.02185700  |
| C  | 2.79005200  | 2.69512400  | -0.16206300 |

#### 1Zr syn-P/trans-P

E: -1010.28400095 A.U.

|    |             |             |             |
|----|-------------|-------------|-------------|
| Zr | 0.17057200  | 0.76208000  | 0.26565300  |
| N  | 2.09943800  | -0.55157000 | 0.10296900  |
| N  | -0.30765200 | -0.90198400 | -0.73230300 |
| C  | 1.95517400  | -1.71100700 | -0.60794900 |
| C  | 3.02451400  | -2.60863700 | -0.77048100 |
| H  | 2.87920200  | -3.52786900 | -1.35866200 |
| C  | 4.25898400  | -2.32799500 | -0.16801100 |
| H  | 5.10408700  | -3.02558200 | -0.27598400 |
| C  | 4.39839700  | -1.14342300 | 0.57940100  |
| H  | 5.34649300  | -0.88439200 | 1.07379300  |
| C  | 3.30408100  | -0.28129900 | 0.68002000  |
| H  | 3.38951900  | 0.66381400  | 1.24054200  |
| C  | 0.57830700  | -1.96741300 | -1.17728000 |
| H  | 0.20559000  | -2.96359000 | -0.84511600 |
| C  | -1.72723100 | -0.98808700 | -0.58692700 |
| C  | -2.28799800 | -1.66126300 | 0.56179300  |
| C  | -3.68149300 | -1.61416500 | 0.74480100  |
| H  | -4.12771200 | -2.11397600 | 1.61963300  |
| C  | -4.51686400 | -0.97165200 | -0.18917400 |
| H  | -5.60543500 | -0.94893900 | -0.02261000 |
| C  | -3.97758400 | -0.40826700 | -1.35478900 |
| H  | -4.64928800 | 0.02783900  | -2.11133800 |
| C  | -2.58933800 | -0.43257500 | -1.60063700 |
| C  | -1.44803500 | -2.50304000 | 1.49632800  |
| H  | -0.38187100 | -2.20329000 | 1.53763300  |
| C  | -2.07434600 | -0.01174900 | -2.95369500 |
| H  | -0.97068700 | 0.04302500  | -3.00313600 |
| H  | -1.85708900 | -2.50662400 | 2.52704200  |
| H  | -1.46895600 | -3.56422900 | 1.16204600  |
| H  | -2.50517900 | 0.95609800  | -3.28324900 |
| H  | -2.39663200 | -0.75972000 | -3.71128800 |
| C  | 1.75711500  | 2.06172700  | -1.39358200 |
| H  | 0.62350300  | -2.01893600 | -2.29214200 |
| H  | 1.51200900  | 1.29601000  | -2.16082600 |
| C  | 0.70820400  | 2.88202600  | -0.96060300 |
| C  | -0.66300600 | 2.54078300  | -1.13888800 |
| C  | -1.14854700 | 1.90209100  | 2.24637900  |

|   |             |             |             |
|---|-------------|-------------|-------------|
| H | -0.54619200 | 2.81520800  | 2.42695500  |
| C | -2.32856500 | 2.00353300  | 1.55759700  |
| H | -2.97619000 | 1.12444200  | 1.38541400  |
| C | -0.61698500 | 0.63123000  | 2.73540900  |
| H | -1.32423900 | -0.20964100 | 2.84426500  |
| C | 0.72102000  | 0.42335600  | 2.95811200  |
| H | 1.43937800  | 1.26758900  | 2.94746400  |
| H | 1.10751600  | -0.54941300 | 3.30010800  |
| H | -2.70015500 | 2.97952100  | 1.20914500  |
| H | 0.96237800  | 3.73731400  | -0.30130800 |
| H | -1.42990000 | 3.25501600  | -0.80740300 |
| C | 3.20949700  | 2.40585100  | -1.24985900 |
| H | 3.85467700  | 1.51065900  | -1.14446600 |
| H | 3.55107200  | 2.91252500  | -2.18144800 |
| H | 3.40552400  | 3.10391700  | -0.41066400 |
| H | -0.93861300 | 1.95474700  | -2.03295900 |

#### TS<sub>1-2Zr</sub> syn-P/trans-P

E: -1010.25920927 A.U.

|    |             |             |             |
|----|-------------|-------------|-------------|
| Zr | 0.23040500  | 0.67111600  | 0.46740700  |
| N  | 2.13479500  | -0.60038000 | 0.15789600  |
| N  | -0.31632100 | -0.92608600 | -0.61843400 |
| C  | 1.96928900  | -1.71480600 | -0.61844800 |
| C  | 3.04945300  | -2.56654400 | -0.90645100 |
| H  | 2.89067400  | -3.45556300 | -1.53617700 |
| C  | 4.31520800  | -2.28000100 | -0.37492700 |
| H  | 5.16936400  | -2.94317200 | -0.58300500 |
| C  | 4.47689700  | -1.13816900 | 0.43325900  |
| H  | 5.45054200  | -0.88121500 | 0.87629500  |
| C  | 3.36692200  | -0.32526800 | 0.67165800  |
| H  | 3.45638500  | 0.57751700  | 1.29928800  |
| C  | 0.56384700  | -1.97860400 | -1.11047300 |
| H  | 0.22225000  | -2.98069900 | -0.75934800 |
| C  | -1.74477700 | -1.00240600 | -0.57986000 |
| C  | -2.40009300 | -1.70864000 | 0.49439500  |
| C  | -3.80395600 | -1.64177500 | 0.57312400  |
| H  | -4.32162200 | -2.15988600 | 1.39622400  |
| C  | -4.55434000 | -0.95201400 | -0.39383200 |
| H  | -5.65171700 | -0.91282800 | -0.30890100 |
| C  | -3.91724800 | -0.35388900 | -1.49463400 |
| H  | -4.52336900 | 0.12174900  | -2.28227900 |
| C  | -2.51720500 | -0.38787100 | -1.63015400 |
| C  | -1.64886800 | -2.59030900 | 1.46423600  |
| H  | -0.57433400 | -2.34064500 | 1.55185000  |
| C  | -1.88844000 | 0.09918700  | -2.91482900 |
| H  | -0.79371200 | 0.24904800  | -2.84137100 |
| H  | -2.10276600 | -2.56998200 | 2.47577200  |
| H  | -1.71064500 | -3.64882000 | 1.12688400  |
| H  | -2.35982100 | 1.03320200  | -3.28295000 |
| H  | -2.05105300 | -0.65765700 | -3.71394000 |
| C  | 1.57711500  | 2.20140200  | -1.40038600 |
| H  | 0.54741900  | -2.03031100 | -2.22587400 |
| H  | 1.21694200  | 1.43937800  | -2.12465900 |
| C  | 0.63272900  | 2.90782200  | -0.67882900 |
| C  | -0.81960900 | 2.65835200  | -0.71374800 |
| C  | -0.94099000 | 1.92421200  | 2.13798100  |
| H  | -0.15838600 | 2.63249800  | 2.48741900  |
| C  | -1.80898800 | 2.41031900  | 1.09951500  |
| H  | -2.66291400 | 1.78433400  | 0.77803300  |
| C  | -0.83389700 | 0.58767700  | 2.63244600  |
| H  | -1.71063900 | -0.08257900 | 2.56440300  |

|   |             |             |             |
|---|-------------|-------------|-------------|
| C | 0.43071000  | 0.04722000  | 2.90842000  |
| H | 1.27951000  | 0.73188300  | 3.12023300  |
| H | 0.55267000  | -0.98151000 | 3.27967900  |
| H | -2.04763400 | 3.48234000  | 1.14358500  |
| H | 0.98875800  | 3.73444100  | -0.03232800 |
| H | -1.40147300 | 3.59085000  | -0.76150100 |
| C | 3.03546800  | 2.52143100  | -1.44961600 |
| H | 3.66592500  | 1.60987700  | -1.38826600 |
| H | 3.26691600  | 2.97433500  | -2.44096500 |
| H | 3.34551800  | 3.24516900  | -0.67028500 |
| H | -1.16366100 | 1.97489100  | -1.51340900 |

#### 1<sub>Zr</sub> syn-P/trans-S

E: -1010.28308970 A.U.

|    |             |             |             |
|----|-------------|-------------|-------------|
| Zr | 0.20294400  | 0.81410500  | 0.21445200  |
| N  | 2.10771900  | -0.53822200 | 0.11838400  |
| N  | -0.41040500 | -1.04963300 | -0.17300900 |
| C  | 1.86372700  | -1.85585900 | -0.15228100 |
| C  | 2.90640600  | -2.79828400 | -0.19024000 |
| H  | 2.68043500  | -3.85157600 | -0.41735400 |
| C  | 4.22067300  | -2.38455200 | 0.06823400  |
| H  | 5.04813500  | -3.11077400 | 0.04610500  |
| C  | 4.46509900  | -1.02883200 | 0.35895400  |
| H  | 5.47981700  | -0.66103100 | 0.57222000  |
| C  | 3.38736700  | -0.14067500 | 0.36685000  |
| H  | 3.54547500  | 0.92971300  | 0.57935900  |
| C  | 0.41930300  | -2.22641700 | -0.39339900 |
| H  | 0.11535000  | -3.05711600 | 0.28686700  |
| C  | -1.84292300 | -1.04542300 | -0.28892400 |
| C  | -2.64790800 | -1.27689100 | 0.88248300  |
| C  | -4.04616600 | -1.16897200 | 0.76247700  |
| H  | -4.67665700 | -1.33450200 | 1.65076500  |
| C  | -4.64854800 | -0.89153900 | -0.47499700 |
| H  | -5.74474500 | -0.81299600 | -0.54522500 |
| C  | -3.86322700 | -0.75566800 | -1.63110300 |
| H  | -4.35141000 | -0.59185300 | -2.60512500 |
| C  | -2.46039000 | -0.84912700 | -1.57402900 |
| C  | -2.06113500 | -1.74655800 | 2.19402600  |
| H  | -0.96000100 | -1.64323200 | 2.24072100  |
| C  | -1.67430200 | -0.82214500 | -2.86433600 |
| H  | -0.57904700 | -0.77281600 | -2.71299300 |
| H  | -2.51139000 | -1.22715400 | 3.06584700  |
| H  | -2.28808100 | -2.82535500 | 2.33950600  |
| H  | -1.97839900 | 0.02051400  | -3.52032200 |
| H  | -1.87902600 | -1.74649600 | -3.44719400 |
| C  | 1.39849900  | 1.60518500  | -1.95568000 |
| H  | 0.28879500  | -2.62562400 | -1.42826800 |
| H  | 0.94603700  | 0.70455300  | -2.42568200 |
| C  | 0.51390300  | 2.61203900  | -1.54976900 |
| C  | -0.87294800 | 2.38819000  | -1.32342700 |
| C  | -1.01972100 | 1.70933600  | 2.21472900  |
| H  | -1.64721100 | 0.84974400  | 2.51091100  |
| C  | -1.56544100 | 2.72713700  | 1.46356200  |
| H  | -1.01237900 | 3.66283500  | 1.27576900  |
| C  | 0.38956000  | 1.70557500  | 2.61554100  |
| H  | 0.93914100  | 2.66709500  | 2.54827100  |
| C  | 1.07350100  | 0.57347300  | 2.97589500  |
| H  | 2.14594600  | 0.61056900  | 3.22411000  |
| H  | 0.55794600  | -0.39087900 | 3.12786100  |
| H  | -2.62378600 | 2.70217600  | 1.16032100  |
| H  | 0.94812600  | 3.57886400  | -1.22340700 |

|   |             |            |             |
|---|-------------|------------|-------------|
| H | -1.51738600 | 3.24628300 | -1.08748800 |
| C | 2.85416000  | 1.82975100 | -2.24455500 |
| H | 3.47228800  | 0.92940600 | -2.05727300 |
| H | 2.97381900  | 2.05891100 | -3.32790600 |
| H | 3.27446000  | 2.68908400 | -1.68382000 |
| H | -1.38217300 | 1.59395900 | -1.90235000 |

#### TS<sub>1-2Zr</sub> syn-P/trans-S

E: -1010.27153053 A.U.

|    |             |             |             |
|----|-------------|-------------|-------------|
| Zr | -0.19581400 | 0.74538700  | -0.30180800 |
| N  | -2.16879400 | -0.48076000 | -0.13254500 |
| N  | 0.29985100  | -1.15211900 | 0.09192600  |
| C  | -2.01310900 | -1.81483900 | 0.12226800  |
| C  | -3.12354600 | -2.67062800 | 0.22627600  |
| H  | -2.96989400 | -3.74160100 | 0.42969200  |
| C  | -4.41456100 | -2.14688400 | 0.06912300  |
| H  | -5.29503900 | -2.80368100 | 0.14646600  |
| C  | -4.56901300 | -0.77131400 | -0.19036500 |
| H  | -5.56354900 | -0.31981900 | -0.32215900 |
| C  | -3.42516300 | 0.02386600  | -0.28458300 |
| H  | -3.50686000 | 1.10382900  | -0.49452500 |
| C  | -0.58773200 | -2.29107200 | 0.28144200  |
| H  | -0.36467300 | -3.09862900 | -0.45659500 |
| C  | 1.72171500  | -1.16935100 | 0.27697200  |
| C  | 2.58245600  | -1.42595900 | -0.84980700 |
| C  | 3.97335600  | -1.32283000 | -0.66341100 |
| H  | 4.64560800  | -1.50724400 | -1.51663700 |
| C  | 4.51645900  | -1.02135000 | 0.59636800  |
| H  | 5.60856300  | -0.94781700 | 0.71817500  |
| C  | 3.67745700  | -0.85565300 | 1.71048500  |
| H  | 4.12014400  | -0.67776900 | 2.70372600  |
| C  | 2.27824300  | -0.94931700 | 1.58846900  |
| C  | 2.05237700  | -1.89358300 | -2.18430300 |
| H  | 0.95646100  | -1.77678800 | -2.28369900 |
| C  | 1.43523000  | -0.90503100 | 2.84343000  |
| H  | 0.34748300  | -0.95490500 | 2.64626000  |
| H  | 2.54794400  | -1.37976100 | -3.03443100 |
| H  | 2.27544300  | -2.97508700 | -2.31559300 |
| H  | 1.64552000  | -0.00360300 | 3.45726700  |
| H  | 1.68400700  | -1.77364500 | 3.49027800  |
| C  | -0.97018500 | 1.79773300  | 1.93494000  |
| H  | -0.44558000 | -2.75605200 | 1.28626800  |
| H  | -0.43391600 | 0.91332700  | 2.34710400  |
| C  | -0.20682600 | 2.75753500  | 1.28392300  |
| C  | 1.17745100  | 2.58428500  | 0.86147200  |
| C  | 1.09064500  | 1.58973500  | -2.05211000 |
| H  | 1.71405600  | 0.73234300  | -2.36062200 |
| C  | 1.63352000  | 2.60669500  | -1.19654700 |
| H  | 1.23308100  | 3.62761800  | -1.31728600 |
| C  | -0.25141000 | 1.72518100  | -2.58847500 |
| H  | -0.70978200 | 2.73593800  | -2.57206600 |
| C  | -1.06337900 | 0.64924400  | -2.88486500 |
| H  | -2.10656000 | 0.79382600  | -3.20605400 |
| H  | -0.65159500 | -0.37206500 | -2.98441400 |
| H  | 2.71612200  | 2.56792400  | -0.99777500 |
| H  | -0.70770300 | 3.69980900  | 0.98442800  |
| H  | 1.75390500  | 3.52118300  | 0.84035300  |
| C  | -2.36935400 | 2.00814300  | 2.43326200  |
| H  | -3.00006600 | 1.10393600  | 2.31598900  |
| H  | -2.33516300 | 2.21633600  | 3.52648400  |
| H  | -2.86746900 | 2.87209600  | 1.94980300  |

|   |            |            |            |
|---|------------|------------|------------|
| H | 1.75690400 | 1.78734800 | 1.37245200 |
|---|------------|------------|------------|

#### 1<sub>Zr</sub> syn-S/trans-P

E: -1010.28687615 A.U.

|    |             |             |             |
|----|-------------|-------------|-------------|
| Zr | -0.16029400 | 0.76249900  | -0.37060400 |
| N  | -2.12156800 | -0.48570500 | -0.09934700 |
| N  | 0.27180500  | -0.79870200 | 0.78445900  |
| C  | -2.00784600 | -1.55512000 | 0.74522100  |
| C  | -3.09462800 | -2.41124700 | 0.99434000  |
| H  | -2.97305100 | -3.25849100 | 1.68684200  |
| C  | -4.31602900 | -2.18344900 | 0.34497600  |
| H  | -5.17449000 | -2.85024100 | 0.52088800  |
| C  | -4.42447400 | -1.09304500 | -0.53818600 |
| H  | -5.36082700 | -0.87921200 | -1.07477200 |
| C  | -3.31347900 | -0.26672900 | -0.72239100 |
| H  | -3.37380600 | 0.60458700  | -1.39512500 |
| C  | -0.64445900 | -1.76758200 | 1.36538900  |
| H  | -0.29516000 | -2.80903400 | 1.18113500  |
| C  | 1.69448500  | -0.92606600 | 0.68849100  |
| C  | 2.26127000  | -1.77241400 | -0.33576400 |
| C  | 3.65918400  | -1.79013200 | -0.48204100 |
| H  | 4.11183200  | -2.42647900 | -1.25939100 |
| C  | 4.49084300  | -1.03477800 | 0.36802600  |
| H  | 5.58330200  | -1.06572800 | 0.23103800  |
| C  | 3.94012600  | -0.28333200 | 1.41512500  |
| H  | 4.60485600  | 0.25225000  | 2.11160200  |
| C  | 2.54549200  | -0.23624900 | 1.62412400  |
| C  | 1.41713600  | -2.71129800 | -1.16783500 |
| H  | 0.37364000  | -2.36739300 | -1.31269400 |
| C  | 2.01232500  | 0.41775100  | 2.87315100  |
| H  | 0.91034400  | 0.49922200  | 2.88377400  |
| H  | 1.87154200  | -2.89727700 | -2.16182300 |
| H  | 1.35938100  | -3.70568100 | -0.67159600 |
| H  | 2.45435800  | 1.42106600  | 3.04178400  |
| H  | 2.30510000  | -0.19413300 | 3.75446900  |
| C  | -1.73961900 | 2.42254600  | 0.73438200  |
| H  | -0.70100100 | -1.65878400 | 2.47536300  |
| H  | -1.80538000 | 2.84380800  | -0.30424500 |
| C  | -0.50138300 | 2.55619500  | 1.37723800  |
| C  | 0.70436500  | 2.76740500  | 0.66047500  |
| C  | 1.22807400  | 1.55266400  | -2.48610600 |
| H  | 0.69916400  | 2.48586700  | -2.76701900 |
| C  | 2.41434100  | 1.63391200  | -1.80633700 |
| H  | 2.99911700  | 0.73206500  | -1.54981400 |
| C  | 0.58842500  | 0.28531800  | -2.83903600 |
| H  | 1.21578800  | -0.62357200 | -2.83358100 |
| C  | -0.75644900 | 0.17463400  | -3.07797500 |
| H  | -1.39590000 | 1.07377700  | -3.17907800 |
| H  | -1.22385500 | -0.79553500 | -3.30793800 |
| H  | 2.85294100  | 2.61015000  | -1.54627500 |
| H  | -0.45053100 | 2.27288400  | 2.44518700  |
| H  | 0.65991400  | 3.42676900  | -0.22883700 |
| C  | -3.04761500 | 2.26391300  | 1.45386500  |
| H  | -3.50647900 | 3.26595800  | 1.61009300  |
| H  | -3.78925700 | 1.66899800  | 0.88510500  |
| H  | -2.91268900 | 1.80471900  | 2.45362900  |
| H  | 1.66075900  | 2.80293600  | 1.20484400  |

#### TS<sub>1-2Zr</sub> syn-S/trans-P

E: -1010.25684139 A.U.

|    |             |             |             |
|----|-------------|-------------|-------------|
| Zr | -0.19280300 | 0.65378400  | -0.45632600 |
| N  | -2.19662600 | -0.45136300 | -0.14068900 |
| N  | 0.18875300  | -0.95008700 | 0.67482900  |
| C  | -2.13756200 | -1.55962700 | 0.65929300  |
| C  | -3.28869600 | -2.31209200 | 0.94887700  |
| H  | -3.21219700 | -3.19796200 | 1.59806100  |
| C  | -4.51922600 | -1.93052300 | 0.39552800  |
| H  | -5.42904000 | -2.51463300 | 0.60446400  |
| C  | -4.57316300 | -0.79498800 | -0.43564400 |
| H  | -5.51625400 | -0.46454800 | -0.89569200 |
| C  | -3.39584800 | -0.08382700 | -0.67431300 |
| H  | -3.40244200 | 0.80830800  | -1.32323300 |
| C  | -0.76557800 | -1.92578000 | 1.17948300  |
| H  | -0.49738700 | -2.95854500 | 0.85523000  |
| C  | 1.61143000  | -1.08886500 | 0.63389500  |
| C  | 2.22432600  | -1.87038400 | -0.41471600 |
| C  | 3.62557300  | -1.84122600 | -0.53075500 |
| H  | 4.11177500  | -2.41668300 | -1.33467800 |
| C  | 4.41547600  | -1.11291800 | 0.37746400  |
| H  | 5.51086800  | -1.10286400 | 0.26264100  |
| C  | 3.82064500  | -0.44349800 | 1.45925700  |
| H  | 4.45696000  | 0.05865600  | 2.20569100  |
| C  | 2.42260000  | -0.44139900 | 1.63366600  |
| C  | 1.42236600  | -2.77777200 | -1.31778200 |
| H  | 0.36951700  | -2.45924300 | -1.44789100 |
| C  | 1.84127100  | 0.12888800  | 2.90542300  |
| H  | 0.73562100  | 0.11831900  | 2.92223000  |
| H  | 1.89018000  | -2.88041200 | -2.31758700 |
| H  | 1.39804600  | -3.80391400 | -0.88770800 |
| H  | 2.20201800  | 1.15873700  | 3.10931600  |
| H  | 2.18384600  | -0.48364900 | 3.76748900  |
| C  | -1.38986700 | 2.67386700  | 0.76601200  |
| H  | -0.76773600 | -1.95067000 | 2.29559700  |
| H  | -1.59007200 | 3.21153500  | -0.18956700 |
| C  | -0.06145000 | 2.53574100  | 1.15632200  |
| C  | 1.10127200  | 2.93267800  | 0.36391900  |
| C  | 1.14317700  | 1.69235900  | -2.24208200 |
| H  | 0.51653000  | 2.51904200  | -2.63944700 |
| C  | 2.09084100  | 2.03985600  | -1.22519700 |
| H  | 2.73379300  | 1.23848900  | -0.80977400 |
| C  | 0.79042000  | 0.37038500  | -2.65455000 |
| H  | 1.54212500  | -0.43219200 | -2.54471800 |
| C  | -0.54171900 | 0.02975900  | -2.92061900 |
| H  | -1.28033900 | 0.82737100  | -3.14465600 |
| H  | -0.82487200 | -0.98621200 | -3.23530000 |
| H  | 2.61298000  | 3.00410800  | -1.31686400 |
| H  | 0.13808000  | 2.07744000  | 2.14256600  |
| H  | 0.91750800  | 3.82484100  | -0.25917300 |
| C  | -2.56767200 | 2.46805400  | 1.67004700  |
| H  | -2.93779300 | 3.46328400  | 2.00705200  |
| H  | -3.42437800 | 1.98621100  | 1.15637600  |
| H  | -2.31094800 | 1.88450100  | 2.57637000  |
| H  | 2.02916100  | 2.99734900  | 0.95612100  |

#### 1Zr syn-S/trans-S

E: -1010.28607245 A.U.

|    |             |             |             |
|----|-------------|-------------|-------------|
| Zr | 0.16874600  | 0.85672300  | 0.06825100  |
| N  | 2.15523900  | -0.37363500 | 0.21149200  |
| N  | -0.31030300 | -1.07685800 | -0.03965000 |
| C  | 1.99723700  | -1.72972800 | 0.13725700  |
| C  | 3.09615400  | -2.60066200 | 0.24471300  |

|   |             |             |             |
|---|-------------|-------------|-------------|
| H | 2.93742400  | -3.68809000 | 0.17828400  |
| C | 4.37979000  | -2.07248500 | 0.43829500  |
| H | 5.25045600  | -2.74089700 | 0.52652100  |
| C | 4.53777600  | -0.67547000 | 0.51769000  |
| H | 5.52622500  | -0.21692100 | 0.66978300  |
| C | 3.40720000  | 0.13427400  | 0.39376500  |
| H | 3.49892200  | 1.23219500  | 0.44284700  |
| C | 0.58306200  | -2.22418500 | -0.05975000 |
| H | 0.31370100  | -2.95706800 | 0.73721500  |
| C | -1.74144100 | -1.13934800 | -0.12470100 |
| C | -2.51518900 | -1.27365300 | 1.08423800  |
| C | -3.91613800 | -1.20436600 | 0.98893900  |
| H | -4.52354200 | -1.29656800 | 1.90359200  |
| C | -4.55245600 | -1.05480800 | -0.25623200 |
| H | -5.65134100 | -1.00074000 | -0.30570800 |
| C | -3.79837900 | -1.02393500 | -1.43842800 |
| H | -4.31209700 | -0.97270200 | -2.41171000 |
| C | -2.39123200 | -1.09612200 | -1.40845500 |
| C | -1.88091800 | -1.60249600 | 2.41655700  |
| H | -0.80083000 | -1.36007900 | 2.46307600  |
| C | -1.63980600 | -1.25590000 | -2.70825800 |
| H | -0.54560000 | -1.13083700 | -2.60402000 |
| H | -2.39985900 | -1.10283700 | 3.26026900  |
| H | -1.96917500 | -2.69402500 | 2.61292200  |
| H | -2.01132900 | -0.56086600 | -3.48884800 |
| H | -1.81357200 | -2.27975400 | -3.10646500 |
| C | 1.42364600  | 1.63892000  | -1.94805200 |
| H | 0.50037400  | -2.78384500 | -1.02247300 |
| H | 1.82638500  | 2.42953300  | -1.26067000 |
| C | 0.06360200  | 1.75234600  | -2.27980500 |
| C | -0.85434400 | 2.49088800  | -1.49343400 |
| C | -1.14175400 | 1.84480800  | 2.00315700  |
| H | -1.52938800 | 0.90426700  | 2.43358200  |
| C | -1.95809700 | 2.60638000  | 1.20034100  |
| H | -1.67223600 | 3.62005000  | 0.87919600  |
| C | 0.24428600  | 2.20325500  | 2.30972800  |
| H | 0.57484400  | 3.23476900  | 2.07381700  |
| C | 1.15488000  | 1.30166400  | 2.79519800  |
| H | 2.20287700  | 1.58826900  | 2.97669700  |
| H | 0.85206700  | 0.28827300  | 3.11377100  |
| H | -2.98213900 | 2.27568800  | 0.96431100  |
| H | -0.32881400 | 1.07660700  | -3.06067900 |
| H | -0.48082600 | 3.41997800  | -1.02062600 |
| C | 2.44189700  | 0.94231900  | -2.80679500 |
| H | 2.89310900  | 1.67341300  | -3.51426700 |
| H | 3.27952700  | 0.51197000  | -2.22341300 |
| H | 1.98175700  | 0.13923200  | -3.41670900 |
| H | -1.91994700 | 2.50533600  | -1.76902700 |

#### TS1-Zr syn-S/trans-S

E: -1010.27145155 A.U.

|    |             |             |             |
|----|-------------|-------------|-------------|
| Zr | 0.18866300  | 0.79486400  | 0.23560100  |
| N  | 2.22714100  | -0.33282600 | 0.16176900  |
| N  | -0.19321100 | -1.14730900 | -0.02507500 |
| C  | 2.14569300  | -1.68551100 | -0.02195300 |
| C  | 3.30167000  | -2.48223100 | -0.09389500 |
| H  | 3.20672300  | -3.56952800 | -0.23798500 |
| C  | 4.56247600  | -1.87942700 | 0.01675600  |
| H  | 5.47802600  | -2.48881000 | -0.03852400 |
| C  | 4.64120100  | -0.48521300 | 0.20043000  |
| H  | 5.60976000  | 0.02819900  | 0.29308800  |

|   |             |             |             |
|---|-------------|-------------|-------------|
| C | 3.45521400  | 0.24784700  | 0.27067900  |
| H | 3.48001800  | 1.33963600  | 0.42753500  |
| C | 0.74874800  | -2.24887200 | -0.14326600 |
| H | 0.57207900  | -3.02091500 | 0.64367700  |
| C | -1.61438100 | -1.23300900 | -0.17871500 |
| C | -2.44244700 | -1.51935100 | 0.96630600  |
| C | -3.83823700 | -1.47883400 | 0.80496200  |
| H | -4.48675700 | -1.68512800 | 1.67144200  |
| C | -4.41762500 | -1.20814500 | -0.44774000 |
| H | -5.51407600 | -1.17943000 | -0.54771400 |
| C | -3.60913200 | -1.02068800 | -1.57912200 |
| H | -4.07727600 | -0.87499700 | -2.56574600 |
| C | -2.20387400 | -1.05999200 | -1.48335400 |
| C | -1.86110900 | -1.94884100 | 2.29260200  |
| H | -0.79007500 | -1.69155500 | 2.40606400  |
| C | -1.38113600 | -1.06614300 | -2.74953800 |
| H | -0.31436400 | -0.82081100 | -2.58632200 |
| H | -2.42516800 | -1.52775900 | 3.15003400  |
| H | -1.93751100 | -3.05420700 | 2.39304000  |
| H | -1.79699000 | -0.38265300 | -3.51752600 |
| H | -1.41339800 | -2.08254700 | -3.20108200 |
| C | 0.95814200  | 1.95625400  | -1.84112400 |
| H | 0.63088700  | -2.77934700 | -1.11804500 |
| H | 1.59424500  | 2.56689900  | -1.14853000 |
| C | -0.41743000 | 2.16591300  | -1.75870900 |
| C | -1.05432300 | 2.95306600  | -0.71010700 |
| C | -1.15337500 | 1.52544700  | 1.98089400  |
| H | -1.61068600 | 0.57549400  | 2.30610400  |
| C | -1.88507000 | 2.41247600  | 1.11482500  |
| H | -1.84665200 | 3.48888200  | 1.34975700  |
| C | 0.14112700  | 1.90933700  | 2.51401300  |
| H | 0.42787800  | 2.97913900  | 2.45678700  |
| C | 1.10506100  | 0.99550500  | 2.88035800  |
| H | 2.11072100  | 1.31965300  | 3.19096100  |
| H | 0.86202600  | -0.07327700 | 3.02504300  |
| H | -2.88192000 | 2.06654100  | 0.79612100  |
| H | -1.06886900 | 1.66744200  | -2.49937300 |
| H | -0.41497300 | 3.76502000  | -0.31406800 |
| C | 1.68647800  | 1.33436100  | -2.99709400 |
| H | 2.14449800  | 2.14190300  | -3.61142100 |
| H | 2.51942400  | 0.67765400  | -2.67454800 |
| H | 1.00870500  | 0.76364100  | -3.66101500 |
| H | -2.05632900 | 3.31355900  | -0.99192400 |

#### 2<sub>Zr</sub> syn-P/trans-P

E: -1010.30040403 A.U.

|    |             |             |             |
|----|-------------|-------------|-------------|
| Zr | -0.31437600 | 0.80031000  | 0.00406300  |
| N  | -2.51421000 | 0.11550400  | 0.00655800  |
| N  | -0.28250300 | -1.18532500 | -0.15197300 |
| C  | -2.69597900 | -1.23403400 | -0.13672000 |
| C  | -3.98545400 | -1.79004400 | -0.16724100 |
| H  | -4.10861200 | -2.87753800 | -0.28635400 |
| C  | -5.10261200 | -0.94999100 | -0.04595200 |
| H  | -6.11969900 | -1.37174900 | -0.06814800 |
| C  | -4.90840800 | 0.43698300  | 0.10093500  |
| H  | -5.75765700 | 1.12974400  | 0.19574500  |
| C  | -3.60250700 | 0.92934700  | 0.11804500  |
| H  | -3.41195500 | 2.01185900  | 0.21841500  |
| C  | -1.43881400 | -2.06590700 | -0.26393900 |
| H  | -1.43614500 | -2.60886500 | -1.23943800 |
| C  | 1.08032200  | -1.62631700 | -0.08045700 |

|   |             |             |             |
|---|-------------|-------------|-------------|
| C | 1.85588400  | -1.74161600 | -1.28779400 |
| C | 3.22084700  | -2.07488000 | -1.16902600 |
| H | 3.83330600  | -2.15927400 | -2.08097200 |
| C | 3.79668600  | -2.34102900 | 0.08166700  |
| H | 4.86378000  | -2.60503500 | 0.14863000  |
| C | 3.00924500  | -2.31668400 | 1.24734900  |
| H | 3.46197300  | -2.58400500 | 2.21556700  |
| C | 1.64397900  | -1.98497100 | 1.19586800  |
| C | 1.23550100  | -1.66522800 | -2.66288100 |
| H | 0.24242000  | -1.17829200 | -2.67590800 |
| C | 0.80325900  | -2.10564600 | 2.44645700  |
| H | -0.11969300 | -1.49198100 | 2.42456300  |
| H | 1.90006100  | -1.15340200 | -3.38852900 |
| H | 1.09631500  | -2.69572200 | -3.05837100 |
| H | 1.38098600  | -1.84480900 | 3.35599100  |
| H | 0.47976400  | -3.16132400 | 2.58363500  |
| C | 0.98499700  | 1.40761600  | 2.04646600  |
| H | -1.41502400 | -2.85598500 | 0.52324900  |
| H | 1.49400500  | 0.43394700  | 2.18391300  |
| C | 1.64019900  | 2.39540600  | 1.34795300  |
| C | 2.94731900  | 2.25534300  | 0.60711600  |
| C | 1.26197300  | 2.59635600  | -1.21362200 |
| H | 0.63063200  | 3.43401200  | -0.84792000 |
| C | 2.73702700  | 2.69286200  | -0.87341900 |
| H | 3.34861200  | 2.06466700  | -1.55143300 |
| C | 0.64306100  | 1.72454700  | -2.11014700 |
| H | 1.26961800  | 0.98464400  | -2.64154800 |
| C | -0.78259400 | 1.57769800  | -2.14376700 |
| H | -1.39297100 | 2.47967500  | -1.91136900 |
| H | -1.24921600 | 0.90713200  | -2.88333700 |
| H | 3.06944300  | 3.74147600  | -1.03128400 |
| H | 1.19415700  | 3.40957300  | 1.36308500  |
| H | 3.72443700  | 2.87067100  | 1.11299500  |
| C | -0.33714100 | 1.62086200  | 2.74501600  |
| H | -1.19927300 | 1.04172600  | 2.28595900  |
| H | -0.32383500 | 1.22151000  | 3.78149900  |
| H | -0.63875300 | 2.68756900  | 2.78150500  |
| H | 3.29459300  | 1.20210100  | 0.65378800  |

#### 2<sub>Zr</sub> syn-P/trans-S

E: -1010.30263665 A.U.

|    |             |             |             |
|----|-------------|-------------|-------------|
| Zr | -0.26116500 | 0.73086900  | 0.02803700  |
| N  | -2.48504200 | 0.08839700  | 0.02228800  |
| N  | -0.30090800 | -1.23929100 | -0.27922800 |
| C  | -2.70795400 | -1.24274200 | -0.20370600 |
| C  | -4.01216800 | -1.76383400 | -0.24240100 |
| H  | -4.16619000 | -2.83675800 | -0.43499700 |
| C  | -5.10270800 | -0.90798400 | -0.03014000 |
| H  | -6.13100500 | -1.30130700 | -0.05436400 |
| C  | -4.86656000 | 0.45935700  | 0.20993000  |
| H  | -5.69400400 | 1.16448300  | 0.37803400  |
| C  | -3.54828100 | 0.91828000  | 0.21863500  |
| H  | -3.32679000 | 1.98753400  | 0.37749100  |
| C  | -1.47359100 | -2.09526400 | -0.39851200 |
| H  | -1.50810800 | -2.60068500 | -1.39348200 |
| C  | 1.04265500  | -1.67550500 | -0.05544300 |
| C  | 1.91670500  | -1.89698700 | -1.17833200 |
| C  | 3.26211000  | -2.21446500 | -0.91905100 |
| H  | 3.94741700  | -2.38440400 | -1.76478600 |
| C  | 3.73712300  | -2.34704900 | 0.39739600  |
| H  | 4.79528100  | -2.59654700 | 0.57387400  |

|   |             |             |             |
|---|-------------|-------------|-------------|
| C | 2.86370600  | -2.20620200 | 1.48803500  |
| H | 3.23851500  | -2.36885200 | 2.51130900  |
| C | 1.50282300  | -1.89968500 | 1.29279300  |
| C | 1.40779000  | -1.89810000 | -2.59898200 |
| H | 0.44414400  | -1.36652300 | -2.71877200 |
| C | 0.56706900  | -1.92088100 | 2.48058800  |
| H | 0.34835400  | -2.97378400 | 2.76481000  |
| H | 2.14823300  | -1.46802200 | -3.30352000 |
| H | 1.24046900  | -2.94580600 | -2.93444900 |
| H | -0.41407700 | -1.44090300 | 2.28899700  |
| H | 1.02424000  | -1.45382400 | 3.37604200  |
| C | 1.23317200  | 1.74104800  | 1.81384600  |
| H | -1.44612600 | -2.91539200 | 0.35731700  |
| H | 1.98993300  | 0.93287900  | 1.86739900  |
| C | 1.47099700  | 2.84931500  | 1.03851200  |
| C | 2.62811200  | 3.08270200  | 0.09577700  |
| C | 1.48876600  | 1.53175300  | -1.58683300 |
| H | 1.52089800  | 0.59406900  | -2.17459800 |
| C | 2.79438500  | 1.94445000  | -0.93530400 |
| H | 3.54023600  | 2.23204100  | -1.71169700 |
| C | 0.34986900  | 2.33930700  | -1.75685400 |
| H | 0.38351600  | 3.38743500  | -1.39897800 |
| C | -0.93190400 | 1.77932600  | -2.00981400 |
| H | -1.81067600 | 2.44058100  | -2.08691100 |
| H | -1.00741700 | 0.85024600  | -2.61149400 |
| H | 3.23600500  | 1.04784800  | -0.44634200 |
| H | 0.73949200  | 3.67902800  | 1.13191500  |
| H | 2.48124100  | 4.05520500  | -0.41537200 |
| C | 0.01474800  | 1.62600900  | 2.70201200  |
| H | 0.26729700  | 1.23380100  | 3.70917300  |
| H | -0.51983700 | 2.59079700  | 2.81883800  |
| H | -0.76159800 | 0.86692800  | 2.35626800  |
| H | 3.56763100  | 3.19431200  | 0.68248900  |

#### 2<sub>Zr</sub> syn-S/trans-P

E: -1010.30290238 A.U.

|    |             |             |             |
|----|-------------|-------------|-------------|
| Zr | -0.31863800 | 0.81265200  | 0.00033300  |
| N  | -2.52297900 | 0.13018600  | 0.03775400  |
| N  | -0.30058000 | -1.17345900 | -0.18645200 |
| C  | -2.71248300 | -1.21393700 | -0.13623200 |
| C  | -4.00346900 | -1.76733200 | -0.14592400 |
| H  | -4.13249900 | -2.85073800 | -0.29289300 |
| C  | -5.11485300 | -0.92972500 | 0.03253700  |
| H  | -6.13314000 | -1.34902900 | 0.02767500  |
| C  | -4.91264300 | 0.45184600  | 0.21291800  |
| H  | -5.75681400 | 1.14338500  | 0.35185500  |
| C  | -3.60549900 | 0.94195500  | 0.20201700  |
| H  | -3.41008000 | 2.02181000  | 0.31922900  |
| C  | -1.46106400 | -2.04543000 | -0.32103300 |
| H  | -1.47784900 | -2.54650300 | -1.31871900 |
| C  | 1.05953200  | -1.60611700 | -0.06793800 |
| C  | 1.87080200  | -1.75147300 | -1.24938100 |
| C  | 3.23945500  | -2.04408000 | -1.08060200 |
| H  | 3.87986000  | -2.14729600 | -1.97124800 |
| C  | 3.78663800  | -2.24824300 | 0.19564400  |
| H  | 4.85783300  | -2.48160900 | 0.30104500  |
| C  | 2.96559200  | -2.20860900 | 1.33662500  |
| H  | 3.39494700  | -2.43954500 | 2.32482000  |
| C  | 1.59308700  | -1.91581400 | 1.23447500  |
| C  | 1.28407500  | -1.74093400 | -2.64054000 |
| H  | 0.26886300  | -1.30481100 | -2.68816500 |

|   |             |             |             |
|---|-------------|-------------|-------------|
| C | 0.71522300  | -2.05332700 | 2.45698500  |
| H | -0.26524600 | -1.54698700 | 2.36147100  |
| H | 1.93996500  | -1.21528400 | -3.36427600 |
| H | 1.20610800  | -2.78744000 | -3.00987000 |
| H | 1.22176600  | -1.68868300 | 3.37363600  |
| H | 0.50020100  | -3.12955600 | 2.63952400  |
| C | 0.87076500  | 2.22784100  | 1.85002100  |
| H | -1.42591700 | -2.86878600 | 0.43055200  |
| H | 0.62723600  | 3.29013900  | 1.64440800  |
| C | 2.05658100  | 1.74067900  | 1.35842500  |
| C | 2.98806700  | 2.53176300  | 0.47117800  |
| C | 1.25172400  | 2.33627000  | -1.30806100 |
| H | 0.75866800  | 3.21521700  | -0.83193300 |
| C | 2.72923600  | 2.22574900  | -1.03325600 |
| H | 3.10588000  | 1.21643300  | -1.30264100 |
| C | 0.46024100  | 1.62641700  | -2.20989700 |
| H | 0.92981400  | 0.84457900  | -2.83299000 |
| C | -0.96779600 | 1.64803800  | -2.08436300 |
| H | -1.43790500 | 2.60994900  | -1.77612900 |
| H | -1.58785100 | 1.05951000  | -2.77931800 |
| H | 3.30146800  | 2.95287200  | -1.65318100 |
| H | 2.35934800  | 0.70461000  | 1.61605300  |
| H | 2.83963400  | 3.61705600  | 0.65396200  |
| C | -0.08387800 | 1.49802000  | 2.76155800  |
| H | -0.39053900 | 2.14755300  | 3.60965300  |
| H | -1.09003200 | 1.25546000  | 2.29251200  |
| H | 0.32871800  | 0.55391800  | 3.16409700  |
| H | 4.04199000  | 2.29926000  | 0.72749600  |

#### 2<sub>Zr</sub> syn-S/trans-S

E: -1010.30482684 A.U.

|    |             |             |             |
|----|-------------|-------------|-------------|
| Zr | -0.21337500 | 0.65291400  | -0.09270100 |
| N  | -2.45135100 | 0.07272200  | 0.00556100  |
| N  | -0.33100100 | -1.32957600 | -0.27576400 |
| C  | -2.72508200 | -1.26353400 | -0.10526600 |
| C  | -4.04517300 | -1.74103900 | -0.05573000 |
| H  | -4.24061800 | -2.81958200 | -0.15844300 |
| C  | -5.09898800 | -0.83388200 | 0.13013300  |
| H  | -6.13929900 | -1.19226000 | 0.17539600  |
| C  | -4.81053000 | 0.53880700  | 0.25279800  |
| H  | -5.60799300 | 1.28305700  | 0.39532800  |
| C  | -3.47916800 | 0.95161800  | 0.17376000  |
| H  | -3.21940000 | 2.02238600  | 0.23521900  |
| C  | -1.52161700 | -2.16798000 | -0.27289500 |
| H  | -1.61049800 | -2.75278100 | -1.21955300 |
| C  | 0.97854800  | -1.67899100 | 0.16820900  |
| C  | 1.94886100  | -2.23119700 | -0.73290600 |
| C  | 3.24658200  | -2.45635700 | -0.23725300 |
| H  | 4.00742500  | -2.89105100 | -0.90519700 |
| C  | 3.58800200  | -2.15100700 | 1.09386700  |
| H  | 4.61251800  | -2.34165600 | 1.45015200  |
| C  | 2.63178400  | -1.62688300 | 1.97810400  |
| H  | 2.90478800  | -1.42572900 | 3.02625100  |
| C  | 1.30975000  | -1.40213000 | 1.54346000  |
| C  | 1.57744000  | -2.63215500 | -2.13662300 |
| H  | 0.68993900  | -2.08700400 | -2.51492100 |
| C  | 0.23706100  | -1.00178400 | 2.53512100  |
| H  | -0.49687900 | -0.22596800 | 2.18126400  |
| H  | 2.42017900  | -2.48508000 | -2.84059700 |
| H  | 1.32702600  | -3.71591600 | -2.17128100 |
| H  | 0.67381300  | -0.60930700 | 3.47268500  |
| H  | -0.40614000 | -1.86757000 | 2.80439400  |

|   |             |             |             |
|---|-------------|-------------|-------------|
| C | 0.86006100  | 2.79936300  | 1.20302300  |
| H | -1.48134300 | -2.92227500 | 0.54731200  |
| H | 0.44435400  | 3.59957900  | 0.55346800  |
| C | 2.04829600  | 2.23792400  | 0.81627100  |
| C | 2.81361400  | 2.62283200  | -0.42565400 |
| C | 1.42700900  | 1.06558400  | -1.90666700 |
| H | 1.34111300  | 0.05092600  | -2.34291100 |
| C | 2.81922000  | 1.50151000  | -1.49022400 |
| H | 3.39466100  | 1.84028100  | -2.38246700 |
| C | 0.34610100  | 1.93952000  | -2.13354600 |
| H | 0.49063900  | 3.02084400  | -1.94404900 |
| C | -0.98774700 | 1.46942700  | -2.22036000 |
| H | -1.81674100 | 2.19077000  | -2.31209100 |
| H | -1.18691900 | 0.47829800  | -2.67463400 |
| H | 3.37129100  | 0.61749200  | -1.10562200 |
| H | 2.52203400  | 1.48578200  | 1.47993900  |
| H | 2.40710400  | 3.56654000  | -0.84636700 |
| C | 0.15262600  | 2.60189300  | 2.51912500  |
| H | 0.10605100  | 3.57896900  | 3.05115700  |
| H | -0.92174300 | 2.30890200  | 2.41449700  |
| H | 0.66350800  | 1.87858700  | 3.18251700  |
| H | 3.86268400  | 2.84593800  | -0.13247600 |



# Zirconium - Second insertion

## 3<sub>Zr</sub> anti -S/cis-S

E: -1166.23713701 A.U.

|    |             |             |             |
|----|-------------|-------------|-------------|
| Zr | 0.24131500  | -0.10927600 | 0.62054100  |
| N  | -0.61869500 | 2.00404600  | -0.07580300 |
| N  | 1.48105100  | 0.72041700  | -0.72626700 |
| C  | 0.12461500  | 2.66270900  | -1.01750400 |
| C  | -0.26031300 | 3.91741100  | -1.52115400 |
| H  | 0.36534600  | 4.41378400  | -2.27877100 |
| C  | -1.43344900 | 4.51965700  | -1.04915700 |
| H  | -1.75073900 | 5.50228400  | -1.43164800 |
| C  | -2.19452700 | 3.84778500  | -0.07449900 |
| H  | -3.12007000 | 4.28275400  | 0.33082400  |
| C  | -1.75468700 | 2.60388100  | 0.38115900  |
| H  | -2.33046000 | 2.05892400  | 1.14376300  |
| C  | 1.37851400  | 1.96115300  | -1.46670200 |
| H  | 2.26808800  | 2.61386000  | -1.29588300 |
| C  | 2.54318100  | -0.22675200 | -0.88242100 |
| C  | 3.73364000  | -0.10970100 | -0.07553100 |
| C  | 4.70046600  | -1.12855900 | -0.16279200 |
| H  | 5.60847000  | -1.06319600 | 0.45797200  |
| C  | 4.54764500  | -2.19958400 | -1.05886200 |
| H  | 5.31861600  | -2.98442200 | -1.10962800 |
| C  | 3.44694700  | -2.24458000 | -1.92944500 |
| H  | 3.37922200  | -3.04757400 | -2.68075600 |
| C  | 2.44457400  | -1.25715400 | -1.88645000 |
| C  | 4.03797100  | 1.12547100  | 0.74104900  |
| H  | 3.14478300  | 1.73692600  | 0.97291400  |
| C  | 1.38796700  | -1.23210900 | -2.96629900 |
| H  | 0.49320000  | -0.63992800 | -2.69602700 |
| H  | 4.56698400  | 0.88118400  | 1.68525600  |
| H  | 4.73384300  | 1.77909500  | 0.16957100  |
| H  | 1.07129100  | -2.25293700 | -3.26215600 |
| H  | 1.81512400  | -0.77170900 | -3.88477700 |
| C  | -2.44552200 | -0.87733500 | 0.41718300  |
| H  | 1.34806400  | 1.77902300  | -2.56796700 |
| H  | -2.72411100 | -1.70756100 | 1.10654000  |
| C  | -1.43918900 | -1.33446500 | -0.59339700 |
| C  | -0.47833600 | -2.34077900 | -0.31021000 |
| C  | 1.59026300  | -0.20552000 | 2.70595500  |
| H  | 2.60603200  | 0.11610600  | 2.43005200  |
| C  | 1.32889300  | -1.56867200 | 2.79765800  |
| H  | 0.46634300  | -1.95605800 | 3.35886500  |
| C  | 0.61888700  | 0.85085500  | 2.96130800  |
| H  | 0.98960900  | 1.89030700  | 2.91595200  |
| C  | -0.73373900 | 0.63796400  | 3.14401800  |
| H  | -1.14562300 | -0.36262600 | 3.36171500  |
| H  | -1.41479400 | 1.48801200  | 3.30304400  |
| H  | 2.13580800  | -2.28583100 | 2.58578600  |
| H  | -1.58345200 | -1.02783600 | -1.64324200 |
| H  | 0.16782300  | -2.67881100 | -1.13725400 |
| C  | -0.18266200 | -2.78757700 | 0.98771000  |
| H  | 0.58027500  | -3.56623900 | 1.12865200  |
| H  | -0.94689000 | -2.71231000 | 1.77941200  |
| H  | -1.98751500 | -0.11962300 | 1.17573100  |
| C  | -3.72078500 | -0.21929400 | -0.17290000 |
| H  | -4.26220800 | 0.31674800  | 0.63439300  |
| H  | -3.41254800 | 0.54235200  | -0.92496900 |
| C  | -4.62708000 | -1.25562000 | -0.78795600 |
| H  | -4.23836400 | -1.79966900 | -1.67005600 |

|   |             |             |             |
|---|-------------|-------------|-------------|
| C | -5.86694800 | -1.54714200 | -0.33005500 |
| H | -6.24116500 | -0.99518500 | 0.55523600  |
| C | -6.80662600 | -2.54390900 | -0.93124700 |
| H | -7.10867600 | -3.30449000 | -0.17833400 |
| H | -7.74904800 | -2.04858100 | -1.25233400 |
| H | -6.37055100 | -3.06576100 | -1.80580000 |

## 3<sub>Zr</sub> anti -S/trans-S

E: -1166.24117000 A.U.

|    |             |             |             |
|----|-------------|-------------|-------------|
| Zr | 0.08516000  | -0.22055600 | 0.36150400  |
| N  | -0.42179300 | 2.07077800  | -0.04892900 |
| N  | 1.61804200  | 0.61077600  | -0.63505700 |
| C  | 0.50001100  | 2.73259000  | -0.80992500 |
| C  | 0.33568400  | 4.08463800  | -1.16056400 |
| H  | 1.09728600  | 4.58142500  | -1.78121000 |
| C  | -0.79151400 | 4.78247300  | -0.70901900 |
| H  | -0.93578600 | 5.84200300  | -0.97168400 |
| C  | -1.73021500 | 4.10619700  | 0.09241300  |
| H  | -2.62574100 | 4.61404000  | 0.48006600  |
| C  | -1.51051500 | 2.76077400  | 0.39384400  |
| H  | -2.23135100 | 2.20813000  | 1.01569300  |
| C  | 1.70668800  | 1.93290200  | -1.23056800 |
| H  | 2.64198700  | 2.45046700  | -0.91167900 |
| C  | 2.73036600  | -0.30007400 | -0.60665800 |
| C  | 3.69573600  | -0.19287000 | 0.45710100  |
| C  | 4.72028900  | -1.15278200 | 0.52865500  |
| H  | 5.46146100  | -1.09066000 | 1.34161600  |
| C  | 4.83174100  | -2.16885700 | -0.43702900 |
| H  | 5.64155600  | -2.91120800 | -0.36030100 |
| C  | 3.94629000  | -2.20995800 | -1.52312400 |
| H  | 4.08370900  | -2.96884900 | -2.31012100 |
| C  | 2.90158300  | -1.27163600 | -1.65090000 |
| C  | 3.70312700  | 0.96291900  | 1.43315600  |
| H  | 2.74249800  | 1.51369500  | 1.46686300  |
| C  | 2.08581200  | -1.26219200 | -2.92153900 |
| H  | 1.31473300  | -0.47046200 | -2.93533100 |
| H  | 3.96691700  | 0.63899400  | 2.46119600  |
| H  | 4.48345200  | 1.69940800  | 1.14042700  |
| H  | 1.59768100  | -2.24093000 | -3.11271600 |
| H  | 2.75687700  | -1.08541400 | -3.78883300 |
| C  | -1.94663800 | -0.39377500 | -0.98996500 |
| H  | 1.76604100  | 1.87377000  | -2.34454100 |
| H  | -2.25824500 | 0.43198000  | -1.65102800 |
| C  | -1.08741600 | -1.37433700 | -1.51555700 |
| C  | -0.50882900 | -2.39663800 | -0.72069600 |
| C  | 1.06359500  | -1.35040000 | 2.42455700  |
| H  | 2.09236100  | -0.95083600 | 2.36420300  |
| C  | 0.80083400  | -2.60441600 | 1.92470300  |
| H  | -0.17284100 | -3.09446800 | 2.08739300  |
| C  | 0.03139900  | -0.48691800 | 2.99546200  |
| H  | -0.93012300 | -0.95912100 | 3.27559500  |
| C  | 0.16815300  | 0.87138100  | 3.10981200  |
| H  | -0.64937400 | 1.49698100  | 3.50159600  |
| H  | 1.13040900  | 1.37306900  | 2.90846300  |
| H  | 1.59891800  | -3.20955800 | 1.46781200  |
| H  | -0.68288300 | -1.19478900 | -2.52598300 |
| H  | -1.13247700 | -2.86939600 | 0.05722200  |
| C  | -2.67340600 | -0.52552800 | 0.33018800  |
| H  | -2.15760400 | 0.06739800  | 1.16278900  |
| H  | -2.67988600 | -1.57760100 | 0.69051500  |
| H  | 0.24273300  | -3.06372700 | -1.16976900 |

|   |             |             |             |
|---|-------------|-------------|-------------|
| C | -4.14358300 | 0.00870700  | 0.30867900  |
| H | -4.50952200 | 0.07055600  | 1.35492000  |
| H | -4.12848600 | 1.04671200  | -0.09513200 |
| C | -5.05456500 | -0.87037800 | -0.50578800 |
| H | -4.86235100 | -0.92042600 | -1.59449100 |
| C | -6.09073400 | -1.56787900 | 0.01477900  |
| H | -6.27278000 | -1.49639600 | 1.10588600  |
| C | -7.05079800 | -2.41605200 | -0.75820700 |
| H | -8.08854900 | -2.03354800 | -0.64239400 |
| H | -6.81145400 | -2.45207600 | -1.83928600 |
| H | -7.06788300 | -3.45515700 | -0.36285200 |

#### TS<sub>3Zr</sub> *anti* -S/*cis*-S

E: -1166.23167911 A.U.

|    |             |             |             |
|----|-------------|-------------|-------------|
| Zr | 0.26275600  | -0.04253400 | 0.62899100  |
| N  | -0.57970200 | 2.07141300  | -0.04940600 |
| N  | 1.44238100  | 0.73946600  | -0.79466100 |
| C  | 0.13374600  | 2.71318300  | -1.02641500 |
| C  | -0.25294400 | 3.97108600  | -1.51993300 |
| H  | 0.34863700  | 4.45467000  | -2.30480300 |
| C  | -1.39753200 | 4.59250200  | -1.00433600 |
| H  | -1.71529100 | 5.57816000  | -1.37852200 |
| C  | -2.13001600 | 3.93563500  | 0.00198600  |
| H  | -3.03335200 | 4.38513600  | 0.44019500  |
| C  | -1.68938700 | 2.68903200  | 0.44879700  |
| H  | -2.23959500 | 2.15724400  | 1.23937700  |
| C  | 1.35424000  | 1.98523600  | -1.52632700 |
| H  | 2.26490100  | 2.61509000  | -1.38285100 |
| C  | 2.45391500  | -0.25549200 | -0.96433200 |
| C  | 3.69016700  | -0.15877500 | -0.22386000 |
| C  | 4.60851700  | -1.21981100 | -0.31946300 |
| H  | 5.55132200  | -1.16914000 | 0.24846600  |
| C  | 4.36074000  | -2.32173100 | -1.15632700 |
| H  | 5.09684000  | -3.13893300 | -1.21516600 |
| C  | 3.20831100  | -2.36215200 | -1.95685900 |
| H  | 3.06437400  | -3.19621200 | -2.66239000 |
| C  | 2.25185600  | -1.32953500 | -1.90700900 |
| C  | 4.07470500  | 1.08689500  | 0.53929800  |
| H  | 3.21023400  | 1.71463200  | 0.83065500  |
| C  | 1.13226800  | -1.31375600 | -2.92099000 |
| H  | 0.33238100  | -0.58832000 | -2.68075600 |
| H  | 4.67111100  | 0.85104600  | 1.44422300  |
| H  | 4.73140300  | 1.72082900  | -0.09733300 |
| H  | 0.68148400  | -2.31754700 | -3.06371500 |
| H  | 1.54414200  | -1.02657000 | -3.91342700 |
| C  | -2.41692800 | -0.86458600 | 0.48642400  |
| H  | 1.27900600  | 1.81118500  | -2.62680200 |
| H  | -2.75167300 | -1.58453400 | 1.26916800  |
| C  | -1.39575500 | -1.49699800 | -0.41148800 |
| C  | -0.40632100 | -2.38536800 | 0.04171800  |
| C  | 1.62830900  | -0.22825300 | 2.57537700  |
| H  | 2.65750400  | 0.03827500  | 2.29198400  |
| C  | 1.30210200  | -1.61723700 | 2.68622400  |
| H  | 0.63775600  | -1.92655300 | 3.50891900  |
| C  | 0.73830100  | 0.84534300  | 2.94975900  |
| H  | 1.15211300  | 1.86977500  | 2.93352600  |
| C  | -0.62502100 | 0.68220400  | 3.13761800  |
| H  | -1.06614800 | -0.30873500 | 3.34171900  |
| H  | -1.26492200 | 1.55024700  | 3.35693500  |
| H  | 2.12633400  | -2.31443600 | 2.47534800  |
| H  | -1.51116200 | -1.36283700 | -1.50028800 |

|   |             |             |             |
|---|-------------|-------------|-------------|
| H | 0.25622400  | -2.85118700 | -0.70753900 |
| C | -0.13894800 | -2.65024300 | 1.42854900  |
| H | 0.46352200  | -3.54872900 | 1.62585800  |
| H | -0.98660700 | -2.52573500 | 2.12471800  |
| H | -1.95086300 | -0.03570200 | 1.15479400  |
| C | -3.63843700 | -0.24791800 | -0.24045400 |
| H | -4.21393100 | 0.36717100  | 0.48213100  |
| H | -3.26912800 | 0.44177700  | -1.03420800 |
| C | -4.53207200 | -1.31485200 | -0.82304700 |
| H | -4.10682800 | -1.93603900 | -1.63492400 |
| C | -5.80409900 | -1.54305300 | -0.42384900 |
| H | -6.21981900 | -0.91220800 | 0.38701700  |
| C | -6.72790400 | -2.56975700 | -1.00005900 |
| H | -7.09148300 | -3.26200300 | -0.20956500 |
| H | -7.63749500 | -2.08621000 | -1.41862500 |
| H | -6.25084700 | -3.16800700 | -1.80129500 |

#### TS<sub>3Zr</sub> *anti* -S/*trans*-S

E: -1166.22740809 A.U.

|    |             |             |             |
|----|-------------|-------------|-------------|
| Zr | 0.18347200  | -0.10159200 | 0.54940400  |
| N  | -0.52841700 | 2.09712700  | -0.01078300 |
| N  | 1.58695400  | 0.78651300  | -0.57831900 |
| C  | 0.32499100  | 2.80454100  | -0.81189100 |
| C  | 0.03196100  | 4.11439800  | -1.23067900 |
| H  | 0.74507300  | 4.65088500  | -1.87525900 |
| C  | -1.16296600 | 4.71914200  | -0.82039200 |
| H  | -1.40985000 | 5.74366300  | -1.13947500 |
| C  | -2.03676200 | 3.99556700  | 0.01235600  |
| H  | -2.98246300 | 4.43046500  | 0.36823300  |
| C  | -1.68254200 | 2.70048500  | 0.39391500  |
| H  | -2.34194100 | 2.11954400  | 1.05628000  |
| C  | 1.59557000  | 2.09514400  | -1.20351100 |
| H  | 2.48420300  | 2.69240300  | -0.88633500 |
| C  | 2.60004600  | -0.20645200 | -0.76879200 |
| C  | 3.72500900  | -0.26297400 | 0.13053600  |
| C  | 4.64534500  | -1.31681800 | -0.01744200 |
| H  | 5.50422500  | -1.38279300 | 0.66957500  |
| C  | 4.50685400  | -2.26219000 | -1.04810600 |
| H  | 5.24122100  | -3.07729200 | -1.14480700 |
| C  | 3.46654100  | -2.14537300 | -1.98384800 |
| H  | 3.40956900  | -2.85369000 | -2.82583900 |
| C  | 2.51466000  | -1.11229100 | -1.88803500 |
| C  | 4.00335600  | 0.82032400  | 1.14663300  |
| H  | 3.12340100  | 1.45538200  | 1.36695500  |
| C  | 1.53411000  | -0.90993300 | -3.02031000 |
| H  | 0.64811500  | -0.30647200 | -2.74345100 |
| H  | 4.39718400  | 0.40692700  | 2.09800900  |
| H  | 4.79761000  | 1.49663300  | 0.76010500  |
| H  | 1.19272000  | -1.87408300 | -3.44918500 |
| H  | 2.04086100  | -0.37416900 | -3.85362500 |
| C  | -1.59086900 | -1.11772900 | -0.74536500 |
| H  | 1.66778700  | 2.01658100  | -2.31469300 |
| H  | -1.76688400 | -0.68485600 | -1.74531300 |
| C  | -0.63423500 | -2.13538200 | -0.62250300 |
| C  | -0.31702200 | -2.81162600 | 0.61568100  |
| C  | 1.25209600  | -0.90261500 | 2.46647700  |
| H  | 2.22863100  | -0.40991100 | 2.31925200  |
| C  | 1.09437400  | -2.27860400 | 2.09789300  |
| H  | 0.49252300  | -2.91902200 | 2.76205200  |
| C  | 0.18984000  | -0.16247200 | 3.11906300  |
| H  | -0.65613300 | -0.73521600 | 3.54719700  |

|   |             |             |             |
|---|-------------|-------------|-------------|
| C | 0.08036200  | 1.20788600  | 3.04348100  |
| H | -0.78315100 | 1.73680200  | 3.47532000  |
| H | 0.91975000  | 1.83542000  | 2.69097800  |
| H | 1.98112500  | -2.77350800 | 1.67204700  |
| H | -0.03225400 | -2.38632400 | -1.51207800 |
| H | -1.15482300 | -2.90575600 | 1.32807800  |
| C | -2.54263000 | -0.74126600 | 0.36443800  |
| H | -2.07022100 | 0.00244400  | 1.10705300  |
| H | -2.76161800 | -1.61801100 | 1.01451100  |
| H | 0.24828100  | -3.74701400 | 0.48416000  |
| C | -3.87623600 | -0.10540700 | -0.11706200 |
| H | -4.39324000 | 0.34410000  | 0.75652800  |
| H | -3.63914500 | 0.72539700  | -0.82053200 |
| C | -4.77580200 | -1.12634900 | -0.76776900 |
| H | -4.42317400 | -1.57353400 | -1.71683900 |
| C | -5.97251000 | -1.50681600 | -0.26575600 |
| H | -6.31376700 | -1.04191400 | 0.68086600  |
| C | -6.90892900 | -2.49441500 | -0.88863100 |
| H | -7.88653600 | -2.01592300 | -1.11596800 |
| H | -6.50737600 | -2.92854300 | -1.82560400 |
| H | -7.13599400 | -3.32306800 | -0.18294100 |

#### 4<sub>Zr</sub> anti -S/cis-S

E: -1166.25622171 A.U.

|    |             |             |             |
|----|-------------|-------------|-------------|
| Zr | 0.22375500  | 0.10540000  | 0.55179500  |
| N  | 0.26629900  | 2.40278800  | 0.12895100  |
| N  | 1.83864400  | 0.49779400  | -0.53741100 |
| C  | 1.33111400  | 2.83584700  | -0.61270200 |
| C  | 1.48656900  | 4.19345700  | -0.94151400 |
| H  | 2.35700200  | 4.51420800  | -1.53436100 |
| C  | 0.52926400  | 5.12177000  | -0.50941500 |
| H  | 0.63573800  | 6.18878800  | -0.75977900 |
| C  | -0.56465200 | 4.67102300  | 0.25396400  |
| H  | -1.33459900 | 5.36622600  | 0.61995200  |
| C  | -0.65519100 | 3.31116700  | 0.55636500  |
| H  | -1.48561600 | 2.92759200  | 1.17185700  |
| C  | 2.31680500  | 1.77152800  | -1.04246100 |
| H  | 3.33460600  | 2.01295300  | -0.65213900 |
| C  | 2.28124800  | -0.81062400 | -0.91997800 |
| C  | 3.30500500  | -1.47532100 | -0.15690200 |
| C  | 3.61574900  | -2.80986700 | -0.48410900 |
| H  | 4.39095700  | -3.33712800 | 0.09468100  |
| C  | 2.98144800  | -3.46306900 | -1.55139300 |
| H  | 3.24423300  | -4.50597600 | -1.78845100 |
| C  | 2.04388600  | -2.78241100 | -2.34709300 |
| H  | 1.59728100  | -3.29008500 | -3.21687400 |
| C  | 1.69118500  | -1.44887200 | -2.07174700 |
| C  | 4.12720800  | -0.76299500 | 0.88955200  |
| H  | 3.73524500  | 0.23835600  | 1.14754500  |
| C  | 0.80798200  | -0.69884100 | -3.04235800 |
| H  | 0.25551900  | 0.14669000  | -2.58326300 |
| H  | 4.22827800  | -1.36327000 | 1.81726800  |
| H  | 5.16162000  | -0.61884000 | 0.50813100  |
| H  | 0.07966100  | -1.37023200 | -3.53887600 |
| H  | 1.42739200  | -0.26031600 | -3.85593300 |
| C  | -2.21054300 | -0.04038300 | -0.63705700 |
| H  | 2.41454100  | 1.75532500  | -2.15368900 |
| H  | -2.57563000 | 0.36449800  | 0.33544600  |
| C  | -1.55367800 | -1.39196700 | -0.49282700 |
| C  | -1.39956900 | -2.10556900 | 0.67068700  |
| C  | 0.67774400  | -1.55089000 | 2.64311400  |

|   |             |             |             |
|---|-------------|-------------|-------------|
| H | 1.42508900  | -2.34924200 | 2.49295200  |
| C | -0.71815500 | -2.00756200 | 3.07909600  |
| H | -0.97359100 | -1.54695100 | 4.05836600  |
| C | 1.18742300  | -0.25772500 | 2.80617800  |
| H | 2.28263600  | -0.14177100 | 2.72220500  |
| C | 0.40769300  | 0.93556300  | 2.77117500  |
| H | -0.64646000 | 0.89883500  | 3.12122100  |
| H | 0.90654800  | 1.90218400  | 2.94284600  |
| H | -0.67380600 | -3.10175900 | 3.25436400  |
| H | -1.22423800 | -1.86698700 | -1.43367900 |
| H | -0.93219600 | -3.10406000 | 0.58588000  |
| C | -1.83692200 | -1.71067700 | 2.06001000  |
| H | -2.76168100 | -2.27846800 | 2.31725500  |
| H | -2.15599900 | -0.64342300 | 2.10846700  |
| H | -1.49242100 | 0.71277700  | -1.08255400 |
| C | -3.43271400 | -0.03632400 | -1.64102700 |
| H | -3.73928800 | 1.02016400  | -1.78595100 |
| H | -3.05027400 | -0.40213900 | -2.61971200 |
| C | -4.58816500 | -0.86548100 | -1.15978800 |
| H | -4.44191800 | -1.96204700 | -1.12938200 |
| C | -5.79254000 | -0.34985900 | -0.81781300 |
| H | -5.92454800 | 0.74941100  | -0.87356300 |
| C | -6.99587800 | -1.13641400 | -0.40437200 |
| H | -7.37409400 | -0.79507900 | 0.58393800  |
| H | -7.83187500 | -0.96826500 | -1.11835200 |
| H | -6.79681600 | -2.22505000 | -0.35390300 |

#### 4<sub>Zr</sub> anti -S/trans-S

E: -1166.26116677 A.U.

|    |             |             |             |
|----|-------------|-------------|-------------|
| Zr | 0.28739300  | 0.21869400  | 0.31920400  |
| N  | 1.45993900  | 2.22213400  | 0.01660000  |
| N  | 2.20449700  | -0.23982400 | 0.00776400  |
| C  | 2.80232000  | 2.07847000  | -0.20811800 |
| C  | 3.63488000  | 3.19430000  | -0.39845000 |
| H  | 4.71294600  | 3.04780200  | -0.56692300 |
| C  | 3.07959300  | 4.48161300  | -0.37533500 |
| H  | 3.71743600  | 5.36627300  | -0.52715800 |
| C  | 1.69761900  | 4.62514400  | -0.15109300 |
| H  | 1.22026700  | 5.61575100  | -0.12137800 |
| C  | 0.92872000  | 3.47693100  | 0.04845800  |
| H  | -0.15164200 | 3.55647300  | 0.25195100  |
| C  | 3.32248800  | 0.65513400  | -0.24751300 |
| H  | 4.13050600  | 0.52402700  | 0.51155100  |
| C  | 1.99172200  | -1.53302000 | -0.56135200 |
| C  | 2.38987400  | -2.72489200 | 0.13098000  |
| C  | 2.06261900  | -3.96258200 | -0.45555400 |
| H  | 2.36602800  | -4.89255300 | 0.05145600  |
| C  | 1.37187900  | -4.03520100 | -1.67885200 |
| H  | 1.13661200  | -5.01963700 | -2.11302700 |
| C  | 0.99305300  | -2.86717200 | -2.36102400 |
| H  | 0.47616400  | -2.94025700 | -3.33107800 |
| C  | 1.30935400  | -1.60105100 | -1.82998700 |
| C  | 3.19910400  | -2.66039600 | 1.39927800  |
| H  | 3.10018000  | -1.68539600 | 1.91564300  |
| C  | 1.03497900  | -0.34446400 | -2.63173500 |
| H  | 0.63797200  | 0.53563800  | -2.05167700 |
| H  | 2.92688600  | -3.47429300 | 2.10019400  |
| H  | 4.27953100  | -2.79479900 | 1.16965700  |
| H  | 0.30827800  | -0.52892400 | -3.44580000 |
| H  | 1.96405500  | 0.05113800  | -3.09613000 |
| C  | -1.97954200 | -0.39705900 | -0.76537600 |

|   |             |             |             |
|---|-------------|-------------|-------------|
| H | 3.79722200  | 0.44211200  | -1.23366700 |
| H | -1.70617300 | -0.40248400 | -1.83898400 |
| C | -1.97332100 | -1.61541300 | -0.12855800 |
| C | -2.42822700 | -1.97042000 | 1.25919700  |
| C | -0.19260600 | -1.28155900 | 2.26396200  |
| H | 0.86014000  | -1.59182800 | 2.41496400  |
| C | -1.21862600 | -2.39649600 | 2.12402200  |
| H | -1.56859100 | -2.72654500 | 3.12836400  |
| C | -0.52820900 | 0.02888700  | 2.65928700  |
| H | -1.60081200 | 0.28118400  | 2.77369500  |
| C | 0.37808800  | 1.10900700  | 2.57355900  |
| H | 0.03800600  | 2.12936100  | 2.81302300  |
| H | 1.46035300  | 0.92898900  | 2.72298900  |
| H | -0.73125600 | -3.28379100 | 1.66903400  |
| H | -1.58556200 | -2.46593300 | -0.72158000 |
| H | -2.99448400 | -1.14375600 | 1.73431600  |
| C | -2.47979800 | 0.92743500  | -0.23904800 |
| H | -1.64660700 | 1.70169000  | -0.28981000 |
| H | -2.78182600 | 0.86109500  | 0.82675600  |
| H | -3.13815000 | -2.82309200 | 1.17587900  |
| C | -3.65440700 | 1.53713000  | -1.07763300 |
| H | -3.84074200 | 2.56568300  | -0.70436300 |
| H | -3.31448600 | 1.63337300  | -2.13381900 |
| C | -4.90895000 | 0.71064800  | -0.98403100 |
| H | -4.89553900 | -0.28029800 | -1.47693600 |
| C | -6.04202600 | 1.12498500  | -0.37116600 |
| H | -6.04316900 | 2.12758600  | 0.10145700  |
| C | -7.32782100 | 0.36257300  | -0.29902800 |
| H | -8.14576500 | 0.93313200  | -0.79100100 |
| H | -7.26064700 | -0.63252300 | -0.78181800 |
| H | -7.65048000 | 0.22567800  | 0.75618800  |

# Titanium - Path 1

## 1Ti anti-P/cis-P

E: -1021.78940879 A.U.

|    |             |             |             |
|----|-------------|-------------|-------------|
| Ti | -0.05952200 | 0.67360100  | -0.15604200 |
| N  | -1.76606800 | -0.67113700 | -0.18308400 |
| N  | 0.47285000  | -0.76486000 | 0.89784900  |
| C  | -1.66225500 | -1.75984800 | 0.64123800  |
| C  | -2.70770500 | -2.68869300 | 0.77125900  |
| H  | -2.59714700 | -3.54339500 | 1.45621400  |
| C  | -3.86881100 | -2.52401400 | 0.00299800  |
| H  | -4.69259800 | -3.25144300 | 0.07466200  |
| C  | -3.96170800 | -1.41934900 | -0.86647200 |
| H  | -4.85114200 | -1.25759500 | -1.49365100 |
| C  | -2.90215500 | -0.51233000 | -0.91996700 |
| H  | -2.95012400 | 0.37823800  | -1.56492400 |
| C  | -0.33633800 | -1.88034600 | 1.35074800  |
| H  | 0.14058300  | -2.86306500 | 1.13815300  |
| C  | 1.85426600  | -0.74627400 | 0.59974400  |
| C  | 2.38919300  | -1.56870000 | -0.47220800 |
| C  | 3.74898500  | -1.43520900 | -0.78793300 |
| H  | 4.17482700  | -2.04178800 | -1.60324000 |
| C  | 4.58768000  | -0.55757000 | -0.06693400 |
| H  | 5.65252500  | -0.47945200 | -0.33843600 |
| C  | 4.08831700  | 0.18202900  | 1.01313900  |
| H  | 4.76998000  | 0.81590900  | 1.60266100  |
| C  | 2.73339600  | 0.08952700  | 1.39521800  |
| C  | 1.55632200  | -2.59520900 | -1.20384500 |
| H  | 0.48333000  | -2.33095300 | -1.27836700 |
| C  | 2.28635200  | 0.74618300  | 2.67611100  |
| H  | 1.21164500  | 0.60418500  | 2.88382800  |
| H  | 1.94412600  | -2.77068200 | -2.22681000 |
| H  | 1.61656300  | -3.57690500 | -0.68301000 |
| H  | 2.51927200  | 1.83105100  | 2.69035400  |
| H  | 2.85642500  | 0.30421500  | 3.52200900  |
| C  | -3.63227100 | 1.74570900  | 1.48999200  |
| H  | -4.41710200 | 1.10101500  | 1.03976000  |
| H  | -0.47731500 | -1.84249400 | 2.45794100  |
| H  | -3.00542500 | 1.14582900  | 2.17631600  |
| C  | -2.87509600 | 2.49134700  | 0.45146300  |
| C  | -1.50929200 | 2.69842200  | 0.38852800  |
| C  | 0.88392000  | 2.37298800  | -1.77971900 |
| H  | 0.63396600  | 3.42325000  | -1.55364500 |
| C  | 2.09106800  | 1.89386500  | -1.33897800 |
| H  | 2.49873000  | 0.90909900  | -1.62460800 |
| C  | -0.13506900 | 1.60704400  | -2.51166600 |
| H  | -1.03221500 | 2.16461400  | -2.82965600 |
| C  | -0.06512700 | 0.25995100  | -2.75185800 |
| H  | 0.85099700  | -0.32736500 | -2.56436600 |
| H  | -0.87982500 | -0.26863200 | -3.27016600 |
| H  | 2.75960000  | 2.54721000  | -0.75713300 |
| H  | -3.48730000 | 3.01627800  | -0.30565000 |
| H  | -1.17804800 | 3.42860100  | -0.36886000 |
| C  | -0.49252000 | 2.13234700  | 1.27130900  |
| H  | 0.41993700  | 2.74978100  | 1.40482100  |
| H  | -0.83038100 | 1.69066500  | 2.22741900  |
| H  | -4.19881500 | 2.48535800  | 2.10494300  |

## TS1-2Ti anti-P/cis-P

E: -1021.77311323 A.U.

|    |             |             |             |
|----|-------------|-------------|-------------|
| Ti | -0.10950900 | 0.66627900  | -0.42232800 |
| N  | -2.01165700 | -0.40150000 | -0.22898900 |
| N  | 0.31009000  | -0.86561600 | 0.55063000  |
| C  | -1.95385700 | -1.57755000 | 0.46113300  |
| C  | -3.09184000 | -2.38588400 | 0.62875100  |
| H  | -3.01551400 | -3.32723300 | 1.19444900  |
| C  | -4.30626900 | -1.98545900 | 0.05444300  |
| H  | -5.20737900 | -2.60862300 | 0.16525000  |
| C  | -4.35493200 | -0.77938700 | -0.67248300 |
| H  | -5.28543300 | -0.43237900 | -1.14596400 |
| C  | -3.19139900 | -0.01547700 | -0.78611100 |
| H  | -3.19107900 | 0.93771000  | -1.33966700 |
| C  | -0.58124000 | -1.92793400 | 0.98050300  |
| H  | -0.25531100 | -2.92135400 | 0.59438400  |
| C  | 1.73001100  | -0.93992900 | 0.41037700  |
| C  | 2.30160300  | -1.61235600 | -0.73840000 |
| C  | 3.68943300  | -1.50839800 | -0.94265400 |
| H  | 4.13965200  | -1.99648600 | -1.82185500 |
| C  | 4.51267500  | -0.82531200 | -0.03020800 |
| H  | 5.59582300  | -0.75558300 | -0.21724500 |
| C  | 3.96964700  | -0.28102100 | 1.14473400  |
| H  | 4.63640100  | 0.18113100  | 1.89024000  |
| C  | 2.58920000  | -0.35180800 | 1.40888200  |
| C  | 1.49721600  | -2.51321000 | -1.64897700 |
| H  | 0.40675100  | -2.33197900 | -1.62071900 |
| C  | 2.07863000  | 0.07100900  | 2.76368100  |
| H  | 2.45897400  | 1.06874100  | 3.06638700  |
| H  | 1.83956200  | -2.44378200 | -2.70129000 |
| H  | 1.65975700  | -3.57163700 | -1.34626400 |
| H  | 2.45223400  | -0.64047100 | 3.53228500  |
| H  | 0.97489400  | 0.06219900  | 2.82791600  |
| C  | -1.74701600 | 1.33510800  | 2.82913400  |
| H  | -2.30656900 | 0.37599300  | 2.87661100  |
| H  | -0.58456600 | -2.02506700 | 2.09357700  |
| H  | -0.69596900 | 1.18349100  | 3.13381000  |
| C  | -1.92256500 | 1.99783900  | 1.51369800  |
| C  | -0.96844000 | 2.57698800  | 0.69686600  |
| C  | 0.46609600  | 2.59443800  | -2.14112800 |
| H  | 0.24667000  | 3.65790200  | -2.33563400 |
| C  | 1.44921600  | 2.28952800  | -1.15427100 |
| H  | 1.93767900  | 1.28239600  | -1.14313700 |
| C  | -0.35063500 | 1.62824900  | -2.76875600 |
| H  | -1.19086700 | 1.99927500  | -3.38220400 |
| C  | -0.24087400 | 0.23476800  | -2.53936700 |
| H  | 0.77659200  | -0.18150300 | -2.34027500 |
| H  | -0.90506100 | -0.47249300 | -3.05824700 |
| H  | 2.17790300  | 3.06409000  | -0.87889300 |
| H  | -2.97241100 | 2.13471600  | 1.19459900  |
| H  | -1.36120800 | 3.19545700  | -0.13350100 |
| C  | 0.48201200  | 2.53093700  | 0.84806300  |
| H  | 0.98139300  | 3.50429900  | 0.73426600  |
| H  | 0.90266900  | 1.96191800  | 1.69540800  |
| H  | -2.23543700 | 1.98012000  | 3.59798400  |

## 1Ti anti-P/cis-S

E: -1021.78588905 A.U.

|    |             |             |             |
|----|-------------|-------------|-------------|
| Ti | 0.16746800  | -0.62112000 | -0.24666900 |
| N  | 1.77918000  | 0.85186600  | -0.16224100 |
| N  | -0.69168700 | 1.02133000  | -0.12864400 |
| C  | 1.37676800  | 2.16027600  | -0.12746800 |
| C  | 2.30010900  | 3.21692200  | -0.08699900 |

|   |             |             |             |
|---|-------------|-------------|-------------|
| H | 1.93811000  | 4.25631500  | -0.06748300 |
| C | 3.67223300  | 2.92956400  | -0.06775700 |
| H | 4.41286700  | 3.74390600  | -0.03529300 |
| C | 4.08594900  | 1.58440800  | -0.09120600 |
| H | 5.15197000  | 1.31274700  | -0.07701500 |
| C | 3.11562600  | 0.58193200  | -0.14327300 |
| H | 3.40346000  | -0.47803500 | -0.17450300 |
| C | -0.11592000 | 2.35083400  | -0.12855200 |
| H | -0.44126900 | 2.94093400  | -1.01935500 |
| C | -2.05035000 | 0.70463900  | 0.17244200  |
| C | -2.98997400 | 0.52200100  | -0.90935100 |
| C | -4.29044400 | 0.08783600  | -0.59314400 |
| H | -5.01845900 | -0.06821600 | -1.40533500 |
| C | -4.68733400 | -0.09523900 | 0.74103200  |
| H | -5.71091700 | -0.43407700 | 0.96585000  |
| C | -3.80484300 | 0.20376700  | 1.79512200  |
| H | -4.15470400 | 0.12137000  | 2.83657600  |
| C | -2.49025800 | 0.63141500  | 1.54584300  |
| C | -2.67292100 | 0.92234900  | -2.32901600 |
| H | -1.59903900 | 1.12580000  | -2.49511200 |
| C | -1.62822500 | 1.07219600  | 2.70420400  |
| H | -0.56038000 | 1.19448700  | 2.44306200  |
| H | -3.02349800 | 0.17200600  | -3.06772500 |
| H | -3.22054900 | 1.85947800  | -2.57204800 |
| H | -1.70346400 | 0.37163800  | 3.56075300  |
| H | -1.99033600 | 2.05387700  | 3.08159600  |
| C | 2.98160000  | -1.86612700 | 2.28597500  |
| H | 3.99428200  | -1.68253900 | 1.87091600  |
| H | -0.44522300 | 2.93756400  | 0.76095700  |
| H | 2.51207400  | -0.90607600 | 2.57237700  |
| C | 2.15726500  | -2.73193000 | 1.40060800  |
| C | 0.77936800  | -2.66822600 | 1.20187700  |
| C | -0.10679800 | -1.30131100 | -2.57024400 |
| H | -0.46765700 | -0.56030200 | -3.30219400 |
| C | -1.02734100 | -2.03681900 | -1.85772600 |
| H | -0.72495100 | -2.87075900 | -1.19443000 |
| C | 1.32719000  | -1.31748900 | -2.30791300 |
| H | 1.91822100  | -0.47834400 | -2.71040300 |
| C | 1.97677400  | -2.35113800 | -1.66148500 |
| H | 1.47875800  | -3.31200000 | -1.46128900 |
| H | 3.06841500  | -2.32996200 | -1.51899800 |
| H | -2.10635500 | -1.94522200 | -2.04604900 |
| H | 2.66905800  | -3.62115400 | 0.98892200  |
| H | 0.33188900  | -3.53364100 | 0.67893900  |
| C | -0.11254700 | -1.61743200 | 1.61661800  |
| H | -1.18859700 | -1.86778200 | 1.69666200  |
| H | 0.23405900  | -0.90491900 | 2.38910700  |
| H | 3.16992600  | -2.43938600 | 3.22691100  |

#### TS<sub>1-2Ti</sub> anti-P/cis-S

E: -1021.78462678 A.U.

|    |             |             |             |
|----|-------------|-------------|-------------|
| Ti | 0.18774200  | -0.74738400 | -0.11535500 |
| N  | 1.92097700  | 0.56177300  | -0.27827600 |
| N  | -0.55984500 | 0.94197600  | -0.30211100 |
| C  | 1.61740600  | 1.87711800  | -0.50465400 |
| C  | 2.61524300  | 2.83849000  | -0.73402700 |
| H  | 2.33152500  | 3.88773400  | -0.90859700 |
| C  | 3.96049500  | 2.44428800  | -0.73914600 |
| H  | 4.75818600  | 3.18198700  | -0.91897700 |
| C  | 4.27341200  | 1.09110000  | -0.50798900 |
| H  | 5.31510300  | 0.73686100  | -0.50090500 |

|   |             |             |             |
|---|-------------|-------------|-------------|
| C | 3.23374000  | 0.18843400  | -0.27654700 |
| H | 3.44052300  | -0.87323900 | -0.07781400 |
| C | 0.14648300  | 2.19814400  | -0.48208600 |
| H | -0.16517700 | 2.70207300  | -1.42813200 |
| C | -1.94135900 | 0.84504000  | 0.05692100  |
| C | -2.92269600 | 0.65482000  | -0.98175000 |
| C | -4.26310700 | 0.46696800  | -0.59925300 |
| H | -5.02833000 | 0.31452700  | -1.37715700 |
| C | -4.64560700 | 0.51600300  | 0.75140600  |
| H | -5.70053200 | 0.36213500  | 1.02756200  |
| C | -3.69964100 | 0.80864100  | 1.74810900  |
| H | -4.02512200 | 0.90327000  | 2.79635200  |
| C | -2.34429200 | 1.00633000  | 1.43042900  |
| C | -2.58961300 | 0.81147600  | -2.44743600 |
| H | -1.50537100 | 0.75680300  | -2.66355700 |
| C | -1.39574000 | 1.45648200  | 2.51661800  |
| H | -0.32693000 | 1.38862200  | 2.23445300  |
| H | -3.12722800 | 0.07477000  | -3.07988500 |
| H | -2.93401900 | 1.81006200  | -2.79677800 |
| H | -1.54725200 | 0.88380400  | 3.45505500  |
| H | -1.59962900 | 2.51896100  | 2.77458400  |
| C | 2.46614400  | -0.74533300 | 3.01785300  |
| H | 3.31824700  | -0.11960200 | 2.67478100  |
| H | -0.09191700 | 2.91834300  | 0.33634300  |
| H | 1.58291100  | -0.10170800 | 3.18809200  |
| C | 2.22732900  | -1.89802300 | 2.10733800  |
| C | 1.02142900  | -2.34546300 | 1.59942300  |
| C | -0.86292500 | -2.05277800 | -1.94052700 |
| H | -1.69978500 | -1.48380500 | -2.37326200 |
| C | -1.15249200 | -3.04355300 | -1.04225400 |
| H | -0.39227500 | -3.73106100 | -0.63460600 |
| C | 0.48360400  | -1.67590900 | -2.41737400 |
| H | 0.52186900  | -0.86808600 | -3.16849700 |
| C | 1.65983900  | -2.24263300 | -2.01149600 |
| H | 1.70779800  | -3.10388700 | -1.32309200 |
| H | 2.61701900  | -1.89560600 | -2.43112100 |
| H | -2.19620100 | -3.23525200 | -0.74540800 |
| H | 3.11189000  | -2.52668200 | 1.89144500  |
| H | 1.05485100  | -3.32348700 | 1.08384600  |
| C | -0.27468900 | -1.68312100 | 1.69574800  |
| H | -1.17358700 | -2.33051600 | 1.66832100  |
| H | -0.37454000 | -0.88349200 | 2.45515000  |
| H | 2.79193300  | -1.14644800 | 4.00649000  |

#### 1Ti anti-S/cis-P

E: -1021.79596015 A.U.

|    |             |             |             |
|----|-------------|-------------|-------------|
| Ti | -0.25571900 | 0.90804200  | -0.10486200 |
| N  | -2.05288200 | -0.38904000 | -0.06549800 |
| N  | 0.30374600  | -0.59904000 | 0.84484600  |
| C  | -1.95482600 | -1.40612800 | 0.84087200  |
| C  | -3.02676700 | -2.27710000 | 1.09181700  |
| H  | -2.91624200 | -3.08250600 | 1.83426500  |
| C  | -4.22389000 | -2.11353600 | 0.37829300  |
| H  | -5.07554800 | -2.78872200 | 0.55547100  |
| C  | -4.31190500 | -1.08391600 | -0.57625100 |
| H  | -5.22443600 | -0.92908400 | -1.17108500 |
| C  | -3.21042100 | -0.24351900 | -0.76473800 |
| H  | -3.25148900 | 0.57488400  | -1.49967700 |
| C  | -0.60844700 | -1.51547200 | 1.52004800  |
| H  | -0.22533300 | -2.55868600 | 1.49269700  |
| C  | 1.64654100  | -0.90317100 | 0.47502800  |

|   |             |             |             |
|---|-------------|-------------|-------------|
| C | 1.89466700  | -1.86451700 | -0.57771600 |
| C | 3.21542400  | -2.02645600 | -1.02335300 |
| H | 3.42479800  | -2.74375000 | -1.83318400 |
| C | 4.28245100  | -1.31313400 | -0.43598200 |
| H | 5.30717500  | -1.45502700 | -0.81400100 |
| C | 4.05083600  | -0.47689700 | 0.66265300  |
| H | 4.90091300  | 0.00574100  | 1.17101500  |
| C | 2.74817700  | -0.28073000 | 1.16987000  |
| C | 0.81577400  | -2.76573000 | -1.13762400 |
| H | -0.20552500 | -2.34558300 | -1.06968600 |
| C | 2.58499100  | 0.42389700  | 2.49086800  |
| H | 1.52888500  | 0.56871600  | 2.77335200  |
| H | 1.01626600  | -3.02899000 | -2.19550600 |
| H | 0.80905500  | -3.72934400 | -0.58119900 |
| H | 3.11342200  | 1.39895000  | 2.51901400  |
| H | 3.05678900  | -0.19629600 | 3.28429000  |
| C | -2.17336400 | 2.76385600  | 0.10545800  |
| H | -3.26342500 | 2.64310300  | -0.03456300 |
| H | -0.69721200 | -1.25274800 | 2.60255900  |
| H | -1.93306300 | 3.84672000  | 0.17356700  |
| C | -1.67925400 | 1.98744000  | 1.30218000  |
| C | -0.40125000 | 2.21377500  | 1.85285700  |
| C | 0.89033300  | 2.15852500  | -2.01547300 |
| H | 0.77878200  | 3.25259600  | -1.92782700 |
| C | 2.04950300  | 1.58275300  | -1.55940200 |
| H | 2.31079600  | 0.52746800  | -1.74420800 |
| C | -0.22362900 | 1.44572700  | -2.65211000 |
| H | -1.01175100 | 2.07167800  | -3.10705500 |
| C | -0.36771600 | 0.08644900  | -2.66285000 |
| H | 0.43194200  | -0.58634300 | -2.30953100 |
| H | -1.24431000 | -0.39237500 | -3.12520100 |
| H | 2.81898000  | 2.20225100  | -1.07390600 |
| H | -2.42311800 | 1.44367000  | 1.90366300  |
| H | -0.15687800 | 1.71421500  | 2.80553600  |
| C | 0.61887200  | 2.77406900  | 1.07430100  |
| H | 1.65560300  | 2.79210600  | 1.44146700  |
| H | 0.37273800  | 3.53892000  | 0.31835100  |
| H | -1.72463200 | 2.45096300  | -0.88955200 |

#### TS<sub>1-2Ti</sub> anti-S/cis-P

E: -1021.77654504 A.U.

|    |             |             |             |
|----|-------------|-------------|-------------|
| Ti | 0.21823400  | 0.49066900  | 0.33747600  |
| N  | 1.89077700  | -0.89234500 | 0.03129300  |
| N  | -0.58809700 | -1.10923500 | -0.14641900 |
| C  | 1.52741100  | -2.16691300 | -0.30236900 |
| C  | 2.48235300  | -3.18349900 | -0.47193300 |
| H  | 2.15624800  | -4.19852800 | -0.74620200 |
| C  | 3.83913800  | -2.88915800 | -0.27977600 |
| H  | 4.60319100  | -3.67208500 | -0.40561200 |
| C  | 4.20811700  | -1.57950000 | 0.08332200  |
| H  | 5.26020400  | -1.30707600 | 0.25454200  |
| C  | 3.20922200  | -0.61403400 | 0.22506800  |
| H  | 3.45942500  | 0.41867000  | 0.51315400  |
| C  | 0.04226300  | -2.38081200 | -0.44729200 |
| H  | -0.31046500 | -3.18362300 | 0.24343900  |
| C  | -1.98767200 | -0.82774200 | -0.17935700 |
| C  | -2.75413500 | -0.88234700 | 1.04220800  |
| C  | -4.09945800 | -0.46312700 | 0.99946400  |
| H  | -4.69791500 | -0.48757400 | 1.92428900  |
| C  | -4.69846200 | -0.06721100 | -0.20511900 |
| H  | -5.75258300 | 0.25166100  | -0.21395300 |

|   |             |             |             |
|---|-------------|-------------|-------------|
| C | -3.97485600 | -0.11970600 | -1.41156800 |
| H | -4.47662700 | 0.13705700  | -2.35816800 |
| C | -2.62757500 | -0.51327400 | -1.43435900 |
| C | -2.22556800 | -1.48943200 | 2.32378700  |
| H | -1.17599300 | -1.82895100 | 2.25159200  |
| C | -1.91656100 | -0.67285300 | -2.75714300 |
| H | -0.81518500 | -0.58721300 | -2.67956500 |
| H | -2.32585700 | -0.80181900 | 3.19070700  |
| H | -2.83781000 | -2.38000400 | 2.58153000  |
| H | -2.27702700 | 0.05712200  | -3.50898300 |
| H | -2.13078000 | -1.67992300 | -3.17989700 |
| C | 2.37144800  | 3.72931900  | -1.13451300 |
| H | 2.82683100  | 4.18044500  | -2.04952500 |
| H | -0.21544600 | -2.73183100 | -1.47501700 |
| H | 1.45856600  | 4.30496300  | -0.89495500 |
| C | 2.14891300  | 2.28888400  | -1.41286400 |
| C | 0.93891800  | 1.62757500  | -1.58388000 |
| C | 0.48082200  | 2.70806400  | 1.64612400  |
| H | 0.96948000  | 3.68943400  | 1.53492400  |
| C | -0.77253800 | 2.51255300  | 1.01686500  |
| H | -1.44893600 | 1.67799000  | 1.33220600  |
| C | 1.20688400  | 1.68133800  | 2.30732100  |
| H | 2.24168500  | 1.90995900  | 2.61667800  |
| C | 0.72512500  | 0.36606700  | 2.45603200  |
| H | -0.37341500 | 0.19596100  | 2.54327100  |
| H | 1.32961700  | -0.40928500 | 2.94974900  |
| H | -1.35648500 | 3.38229600  | 0.68641300  |
| H | 3.05875800  | 1.69961400  | -1.63090900 |
| H | 1.00361900  | 0.60253700  | -2.00565400 |
| C | -0.37274600 | 2.14069700  | -1.28089500 |
| H | -1.25004300 | 1.63085100  | -1.71143800 |
| H | -0.48725900 | 3.23172900  | -1.23083200 |
| H | 3.13803100  | 3.88464000  | -0.34511900 |

#### 1Ti anti-S/cis-S

E: -1021.79210853 A.U.

|    |             |             |             |
|----|-------------|-------------|-------------|
| Ti | -0.16700900 | 0.33967900  | 0.63427800  |
| N  | -1.71077300 | -1.05917900 | -0.08414000 |
| N  | 0.78688300  | -0.97541100 | -0.24816700 |
| C  | -1.21196800 | -2.17430700 | -0.69964600 |
| C  | -2.05352500 | -3.16292400 | -1.23458300 |
| H  | -1.61498300 | -4.05127000 | -1.71464500 |
| C  | -3.44340700 | -2.99705600 | -1.15652700 |
| H  | -4.12105300 | -3.76057100 | -1.56935900 |
| C  | -3.95571500 | -1.83587900 | -0.54842100 |
| H  | -5.03884100 | -1.65768100 | -0.47441900 |
| C  | -3.06288200 | -0.90024300 | -0.02077700 |
| H  | -3.43760200 | 0.01064700  | 0.46885000  |
| C  | 0.29220600  | -2.23224100 | -0.77864300 |
| H  | 0.63058600  | -2.38154600 | -1.83050300 |
| C  | 2.09697100  | -0.44015900 | -0.44528700 |
| C  | 2.36099800  | 0.35702900  | -1.61983200 |
| C  | 3.62656800  | 0.95676400  | -1.74278500 |
| H  | 3.84301900  | 1.58171300  | -2.62385900 |
| C  | 4.62719500  | 0.74178700  | -0.77958100 |
| H  | 5.61092200  | 1.22285700  | -0.89680500 |
| C  | 4.39580200  | -0.11737600 | 0.30706100  |
| H  | 5.21006000  | -0.32631400 | 1.01927200  |
| C  | 3.14927000  | -0.74197100 | 0.49064100  |
| C  | 1.37558900  | 0.47150500  | -2.76022400 |
| H  | 0.34205500  | 0.18406600  | -2.48189800 |

|   |             |             |             |
|---|-------------|-------------|-------------|
| C | 2.99102000  | -1.75903300 | 1.59308900  |
| H | 1.95918300  | -2.14302500 | 1.68964800  |
| H | 1.36291600  | 1.49137100  | -3.19596000 |
| H | 1.68273800  | -0.20688200 | -3.58666400 |
| H | 3.31840100  | -1.35894600 | 2.57555600  |
| H | 3.64933200  | -2.63106200 | 1.38860300  |
| H | 0.69021800  | -3.10344100 | -0.20407900 |
| C | 0.97826300  | 0.98964100  | 2.46815700  |
| C | 0.23140200  | -0.12592600 | 2.89358700  |
| C | -2.68845900 | 3.05858500  | -1.17241800 |
| H | -3.50125200 | 2.67082700  | -1.81052100 |
| C | -2.92037900 | 4.16815600  | -0.41727900 |
| H | -2.12664900 | 4.66866700  | 0.16353200  |
| C | -1.39572700 | 2.40637300  | -1.30962700 |
| H | -1.27604400 | 1.79308700  | -2.22245200 |
| C | -0.32197500 | 2.46493600  | -0.43606700 |
| H | -0.35362500 | 3.15233900  | 0.42991100  |
| H | 0.68473400  | 2.19650900  | -0.81895200 |
| H | -3.91428100 | 4.64444200  | -0.40347100 |
| H | 2.07668000  | 0.99488100  | 2.52690700  |
| H | 0.75684000  | -1.05349900 | 3.17441200  |
| C | -1.14666800 | -0.20307900 | 2.62252000  |
| H | -1.66423300 | -1.15779200 | 2.80365200  |
| C | -1.99491600 | 1.04125600  | 2.45908400  |
| H | -1.70900300 | 1.83743600  | 3.17975300  |
| H | -1.93651400 | 1.54760200  | 1.44671200  |
| H | -3.06903800 | 0.81372000  | 2.59358600  |
| H | 0.50888100  | 1.99603400  | 2.47058000  |

#### TS<sub>1-2Ti</sub> anti-S/cis-S

E: -1021.78973137 A.U.

|    |             |             |             |
|----|-------------|-------------|-------------|
| Ti | -0.18593700 | 0.52313800  | 0.52436100  |
| N  | -1.91989300 | -0.67188400 | -0.04193200 |
| N  | 0.52074500  | -1.15943900 | 0.27397000  |
| C  | -1.66861000 | -2.01705800 | -0.10037200 |
| C  | -2.67699400 | -2.93990200 | -0.41547800 |
| H  | -2.44547900 | -4.01580300 | -0.44386700 |
| C  | -3.96854000 | -2.47225500 | -0.70468300 |
| H  | -4.77320900 | -3.18023500 | -0.95788700 |
| C  | -4.21643700 | -1.08728900 | -0.67649900 |
| H  | -5.20989300 | -0.67760200 | -0.91229500 |
| C  | -3.17357900 | -0.22351300 | -0.33261000 |
| H  | -3.33576400 | 0.86453000  | -0.29273100 |
| C  | -0.22890000 | -2.40099400 | 0.16351100  |
| H  | 0.17223200  | -3.04083200 | -0.65409100 |
| C  | 1.83791500  | -0.89241800 | -0.20855200 |
| C  | 2.03719300  | -0.69561400 | -1.62658800 |
| C  | 3.31487000  | -0.31632500 | -2.06688000 |
| H  | 3.48789500  | -0.14987500 | -3.14209500 |
| C  | 4.38291700  | -0.17224800 | -1.15977200 |
| H  | 5.37479500  | 0.13172500  | -1.52966800 |
| C  | 4.20499000  | -0.46086700 | 0.20100500  |
| H  | 5.06664100  | -0.41298000 | 0.88591900  |
| C  | 2.95064500  | -0.85939300 | 0.70527800  |
| C  | 0.95045000  | -0.98643100 | -2.63815500 |
| H  | -0.07681800 | -0.78171600 | -2.26986700 |
| C  | 2.85255400  | -1.35853200 | 2.12351100  |
| H  | 1.81598600  | -1.57920000 | 2.43420600  |
| H  | 1.10501200  | -0.41632500 | -3.57573300 |
| H  | 0.97478300  | -2.06110200 | -2.92626000 |
| H  | 3.31085800  | -0.65628700 | 2.85020800  |

|   |             |             |             |
|---|-------------|-------------|-------------|
| H | 3.42955500  | -2.30474400 | 2.21362400  |
| H | -0.14406800 | -3.00691700 | 1.09777600  |
| C | 0.92666700  | 1.45674100  | 2.38570300  |
| C | 0.00151700  | 0.51690000  | 2.86381600  |
| C | -1.20886700 | 2.70867000  | -1.91150500 |
| H | -1.73279300 | 2.07601700  | -2.64910600 |
| C | -1.77491400 | 3.89375800  | -1.55355000 |
| H | -1.27117400 | 4.61729900  | -0.88984200 |
| C | 0.11772300  | 2.24217200  | -1.49322200 |
| H | 0.56476100  | 1.46184700  | -2.13534600 |
| C | 0.87173400  | 2.68068400  | -0.43120200 |
| H | 0.55031500  | 3.52298900  | 0.20404000  |
| H | 1.91011100  | 2.32828800  | -0.30600600 |
| H | -2.75194700 | 4.19975600  | -1.96126300 |
| H | 2.00656000  | 1.30793500  | 2.53185800  |
| H | 0.35675000  | -0.41912600 | 3.32547000  |
| C | -1.34873400 | 0.58252800  | 2.46159300  |
| H | -2.02806400 | -0.23367600 | 2.75209500  |
| C | -1.96559600 | 1.87797900  | 1.98500200  |
| H | -1.72601900 | 2.72361500  | 2.66663000  |
| H | -1.60048600 | 2.25330500  | 0.97755600  |
| H | -3.06370000 | 1.79706300  | 1.88985400  |
| H | 0.60979900  | 2.50270700  | 2.23450400  |

#### 2Ti anti-P/cis-P

E: -1021.81076945 A.U.

|    |             |             |             |
|----|-------------|-------------|-------------|
| Ti | -0.02268800 | -0.37707700 | 0.25028000  |
| N  | -1.57976400 | 1.16207200  | 0.18558100  |
| N  | 0.63378900  | 0.98067700  | -0.88880800 |
| C  | -1.35292000 | 2.21490800  | -0.66008700 |
| C  | -2.30538600 | 3.22619900  | -0.86268800 |
| H  | -2.08489300 | 4.05156300  | -1.55688200 |
| C  | -3.52010700 | 3.17322500  | -0.16589300 |
| H  | -4.27871900 | 3.95938300  | -0.30441700 |
| C  | -3.74729300 | 2.10417500  | 0.72099100  |
| H  | -4.68003600 | 2.02613200  | 1.29918500  |
| C  | -2.76111800 | 1.12722300  | 0.86827600  |
| H  | -2.90866900 | 0.28644000  | 1.56086000  |
| C  | -0.00201800 | 2.20115400  | -1.32227400 |
| H  | 0.57240200  | 3.11314300  | -1.05383200 |
| C  | 1.97489600  | 0.64890500  | -0.67874900 |
| C  | 3.00801300  | 1.51547000  | -0.17009300 |
| C  | 4.20011600  | 0.90551100  | 0.24717600  |
| H  | 5.00777100  | 1.54795800  | 0.63357100  |
| C  | 4.39788900  | -0.49575500 | 0.22086300  |
| H  | 5.35021200  | -0.91737900 | 0.57752100  |
| C  | 3.40953800  | -1.33256400 | -0.29478600 |
| H  | 3.58875600  | -2.41578600 | -0.38221100 |
| C  | 2.20321500  | -0.77668300 | -0.79459400 |
| C  | 2.85021200  | 3.01169000  | -0.05385200 |
| H  | 1.99001700  | 3.29414100  | 0.59071500  |
| C  | 1.26384900  | -1.62874000 | -1.61206600 |
| H  | 1.07029800  | -1.19103200 | -2.61188300 |
| H  | 3.75469200  | 3.46236300  | 0.39657000  |
| H  | 2.70971300  | 3.49536600  | -1.04391000 |
| H  | 0.21869400  | -1.81778200 | -1.19594100 |
| H  | 1.66087300  | -2.65598500 | -1.72765800 |
| C  | -1.78428800 | -3.20843300 | -2.60086300 |
| H  | -1.26262800 | -2.76225400 | -3.47461600 |
| H  | -0.10339900 | 2.21698600  | -2.43379700 |
| H  | -1.17470800 | -4.03017800 | -2.17926100 |



|   |             |             |             |
|---|-------------|-------------|-------------|
| C | -2.18814100 | -2.16732000 | -1.61390100 |
| C | -2.03541300 | -2.18754500 | -0.25129700 |
| C | -1.00862300 | -1.48783700 | 2.33805400  |
| H | -2.04958500 | -1.58679600 | 2.69449200  |
| C | -0.44875700 | -2.70386600 | 1.63693600  |
| H | 0.54231400  | -2.48648100 | 1.14233600  |
| C | -0.31420000 | -0.33197200 | 2.65016600  |
| H | -0.87242800 | 0.47702700  | 3.15344600  |
| C | 0.99753900  | -0.04757700 | 2.12684000  |
| H | 1.77211700  | -0.83793000 | 2.16043900  |
| H | 1.40965200  | 0.95808000  | 2.31486700  |
| H | -0.15033900 | -3.46808600 | 2.39367200  |
| H | -2.72308200 | -1.29453300 | -2.03457100 |
| H | -2.60306600 | -1.41334300 | 0.29622900  |
| C | -1.45052900 | -3.29002000 | 0.61383900  |
| H | -2.28095600 | -3.78739200 | 1.16409900  |
| H | -0.96453500 | -4.08467500 | 0.01350600  |
| H | -2.70834300 | -3.66336200 | -3.02808400 |

#### 2Ti anti-P/cis-S

E: -1021.82217638 A.U.

|    |             |             |             |
|----|-------------|-------------|-------------|
| Ti | 0.14347600  | 0.38308100  | 0.44182100  |
| N  | 2.12163100  | -0.49667800 | 0.19668500  |
| N  | -0.13300700 | -1.01565300 | -0.72119200 |
| C  | 2.17473700  | -1.52079400 | -0.71168700 |
| C  | 3.39027100  | -2.12431800 | -1.07077500 |
| H  | 3.39655600  | -2.94395400 | -1.80571100 |
| C  | 4.57993900  | -1.67902300 | -0.47650800 |
| H  | 5.54275200  | -2.14476900 | -0.73862100 |
| C  | 4.52198600  | -0.63625600 | 0.46760900  |
| H  | 5.42855100  | -0.26225700 | 0.96633500  |
| C  | 3.28048800  | -0.07777700 | 0.77891900  |
| H  | 3.20457300  | 0.72619900  | 1.52825100  |
| C  | 0.83489600  | -1.94643900 | -1.26132300 |
| H  | 0.60700200  | -2.99742000 | -0.96668000 |
| C  | -1.54934400 | -1.09067700 | -0.65032000 |
| C  | -2.18152500 | -2.02865300 | 0.24947700  |
| C  | -3.57794100 | -1.97335500 | 0.38234100  |
| H  | -4.08088300 | -2.67701200 | 1.06466600  |
| C  | -4.34462800 | -1.03795300 | -0.33989100 |
| H  | -5.43782500 | -1.01217300 | -0.20765200 |
| C  | -3.73191700 | -0.16031700 | -1.24615700 |
| H  | -4.35089100 | 0.53083900  | -1.84013900 |
| C  | -2.33668800 | -0.18324300 | -1.44903500 |
| C  | -1.39237800 | -3.07503400 | 0.99675500  |
| H  | -0.38639400 | -2.72576900 | 1.30531500  |
| C  | -1.74012800 | 0.63529600  | -2.56745700 |
| H  | -0.63595700 | 0.68687500  | -2.52589900 |
| H  | -1.93467600 | -3.41866200 | 1.89907000  |
| H  | -1.24635500 | -3.97716600 | 0.36141100  |
| H  | -2.15612400 | 1.66223900  | -2.59452600 |
| H  | -2.00413200 | 0.16967400  | -3.54260300 |
| C  | 0.61463700  | 3.27432100  | -2.38369700 |
| H  | 0.66080000  | 2.65727500  | -3.30464500 |
| H  | 0.83114100  | -1.93152600 | -2.37708100 |
| H  | -0.42060200 | 3.61508300  | -2.19715800 |
| C  | 1.26493700  | 2.60806500  | -1.22633000 |
| C  | 0.83365700  | 2.59646600  | 0.08140000  |
| C  | -1.44713700 | 1.30047300  | 1.97923400  |
| H  | -2.51525000 | 1.25395000  | 1.70050900  |
| C  | -0.82956800 | 2.69072100  | 2.03140300  |

|   |             |             |             |
|---|-------------|-------------|-------------|
| H | 0.02564100  | 2.71284000  | 2.74116200  |
| C | -0.88528200 | 0.13549000  | 2.51687300  |
| H | -1.54533800 | -0.74458200 | 2.60464200  |
| C | 0.51684400  | -0.07713600 | 2.58197400  |
| H | 1.18011200  | 0.79154600  | 2.78045300  |
| H | 0.91834100  | -1.04055200 | 2.93162700  |
| H | -1.60183200 | 3.36306400  | 2.46387600  |
| H | 2.24857000  | 2.14225900  | -1.42842700 |
| H | 1.60504000  | 2.28363700  | 0.82629700  |
| C | -0.38011800 | 3.29884800  | 0.67227600  |
| H | -0.10610600 | 4.36419500  | 0.84772600  |
| H | -1.22370800 | 3.32283900  | -0.05142800 |
| H | 1.22571300  | 4.17962600  | -2.61975100 |

#### 2Ti anti-S/cis-P

E: -1021.81940785 A.U.

|    |             |             |             |
|----|-------------|-------------|-------------|
| Ti | 0.08515400  | 0.43947500  | 0.28052600  |
| N  | 1.66102000  | -1.00281000 | 0.22516600  |
| N  | -0.63644200 | -0.97638000 | -0.67309800 |
| C  | 1.40500800  | -2.14091500 | -0.50065300 |
| C  | 2.38422200  | -3.12733200 | -0.68374000 |
| H  | 2.15003700  | -4.02897000 | -1.27037600 |
| C  | 3.65126300  | -2.95261900 | -0.10425800 |
| H  | 4.42976400  | -3.72191700 | -0.22813300 |
| C  | 3.91131500  | -1.78619700 | 0.63972200  |
| H  | 4.88983100  | -1.61323700 | 1.11194600  |
| C  | 2.89550700  | -0.83882100 | 0.78370200  |
| H  | 3.05444700  | 0.08456300  | 1.35937900  |
| C  | 0.00021600  | -2.22308300 | -1.04755500 |
| H  | -0.53624900 | -3.10861000 | -0.63632300 |
| C  | -2.01599600 | -0.73061900 | -0.41334600 |
| C  | -2.67578600 | -1.36626000 | 0.70796200  |
| C  | -4.00724500 | -1.01744300 | 0.97233700  |
| H  | -4.52344000 | -1.47648500 | 1.83034900  |
| C  | -4.69317000 | -0.08591500 | 0.16771600  |
| H  | -5.73642100 | 0.17476600  | 0.40613100  |
| C  | -4.06955700 | 0.48971900  | -0.94797900 |
| H  | -4.63715600 | 1.17496000  | -1.59756500 |
| C  | -2.74184500 | 0.16136900  | -1.28802900 |
| C  | -1.97999200 | -2.38390800 | 1.57795800  |
| H  | -0.89275400 | -2.19357400 | 1.69321400  |
| C  | -2.18710700 | 0.64328000  | -2.60866300 |
| H  | -1.17103500 | 0.25715400  | -2.81172500 |
| H  | -2.42810800 | -2.41660800 | 2.59039200  |
| H  | -2.09394600 | -3.40789000 | 1.15737800  |
| H  | -2.18319600 | 1.75078400  | -2.69024200 |
| H  | -2.83977900 | 0.28439000  | -3.43268500 |
| C  | 2.78392600  | 1.59123900  | -2.26325700 |
| H  | 2.92644800  | 2.14147400  | -3.22369600 |
| H  | 0.00928200  | -2.36132200 | -2.15534800 |
| H  | 3.43044600  | 2.07184700  | -1.50557800 |
| C  | 1.33100100  | 1.61336600  | -1.93771000 |
| C  | 0.70030800  | 2.37232800  | -0.97670300 |
| C  | 1.37552500  | 2.18456400  | 2.05058200  |
| H  | 2.45102700  | 2.16351100  | 2.30659000  |
| C  | 0.89237300  | 3.42750600  | 1.34474900  |
| H  | -0.21051400 | 3.53395200  | 1.42919700  |
| C  | 0.58304900  | 1.15630800  | 2.53121700  |
| H  | 1.07328800  | 0.37495800  | 3.14090100  |
| C  | -0.79019800 | 0.93180700  | 2.13296500  |
| H  | -1.40475500 | 1.81394600  | 1.83884900  |

|   |             |            |             |
|---|-------------|------------|-------------|
| H | -1.37315300 | 0.17647300 | 2.68428200  |
| H | 1.32583800  | 4.30825600 | 1.86750400  |
| H | 0.68864800  | 0.99252000 | -2.58897800 |
| H | -0.42238500 | 2.37927100 | -1.03064600 |
| C | 1.31641000  | 3.47708100 | -0.13914000 |
| H | 1.00074500  | 4.44993600 | -0.57966400 |
| H | 2.42199000  | 3.44818800 | -0.22059600 |
| H | 3.14029800  | 0.56079500 | -2.46788900 |

|   |             |            |             |
|---|-------------|------------|-------------|
| H | -0.92723300 | 4.22697500 | -0.28114900 |
| H | -1.58522000 | 2.78001700 | -1.01666400 |
| H | -3.09076500 | 3.15989700 | 2.45047000  |

### Titanium – Path 2

#### 1<sub>Ti</sub> syn-P/cis-P

E: -1021.79082153 A.U.

|    |             |             |             |
|----|-------------|-------------|-------------|
| Ti | 0.20594700  | -0.78129100 | -0.14939000 |
| N  | 1.94801600  | 0.55457200  | -0.22078000 |
| N  | -0.52582900 | 0.90710000  | 0.14037100  |
| C  | 1.65723400  | 1.87224200  | -0.01362300 |
| C  | 2.64715600  | 2.86650000  | -0.09076400 |
| H  | 2.37943500  | 3.91910300  | 0.08880100  |
| C  | 3.96224700  | 2.50107800  | -0.41083200 |
| H  | 4.75160100  | 3.26523500  | -0.48483600 |
| C  | 4.25501700  | 1.14338000  | -0.64131700 |
| H  | 5.27134800  | 0.81187500  | -0.90186000 |
| C  | 3.22747100  | 0.20380700  | -0.52745000 |
| H  | 3.42209600  | -0.86851400 | -0.68609800 |
| C  | 0.20651700  | 2.15936300  | 0.27273500  |
| H  | -0.19068700 | 2.92675000  | -0.43284400 |
| C  | -1.94401100 | 0.79892200  | 0.23574100  |
| C  | -2.74063100 | 0.90351500  | -0.96658700 |
| C  | -4.13202900 | 0.72315800  | -0.86092200 |
| H  | -4.75523100 | 0.79457100  | -1.76676200 |
| C  | -4.73896200 | 0.49823000  | 0.38433500  |
| H  | -5.82985900 | 0.35906000  | 0.44442700  |
| C  | -3.97017200 | 0.49836200  | 1.56305200  |
| H  | -4.47082200 | 0.38183900  | 2.53751000  |
| C  | -2.57712500 | 0.67189600  | 1.52523000  |
| C  | -2.15916600 | 1.34090000  | -2.29097800 |
| H  | -1.05258400 | 1.37101200  | -2.29802100 |
| C  | -1.81508900 | 0.80497200  | 2.82084500  |
| H  | -0.71727000 | 0.79555600  | 2.68608300  |
| H  | -2.51086000 | 0.71237100  | -3.13691600 |
| H  | -2.50753700 | 2.37015200  | -2.52661500 |
| H  | -2.09005800 | 0.00964300  | 3.54470300  |
| H  | -2.07927600 | 1.76672800  | 3.31274200  |
| C  | 1.90563600  | -1.39290500 | 2.08495100  |
| H  | 0.07728200  | 2.59397900  | 1.29332000  |
| H  | 1.49165600  | -0.51747900 | 2.62419500  |
| C  | 1.00808100  | -2.28541900 | 1.52278600  |
| C  | -0.41697300 | -2.05216300 | 1.45600500  |
| C  | -0.44042900 | -2.72178900 | -1.58247000 |
| H  | -0.36161500 | -3.66356100 | -1.01316900 |
| C  | -1.66619800 | -2.11694000 | -1.68547800 |
| H  | -1.84976100 | -1.27053900 | -2.36591500 |
| C  | 0.80267500  | -2.21811100 | -2.18445000 |
| H  | 1.66856200  | -2.90372300 | -2.16552600 |
| C  | 0.97254400  | -0.95165200 | -2.67215100 |
| H  | 0.13686400  | -0.23148000 | -2.76740600 |
| H  | 1.93760000  | -0.62212200 | -3.08591500 |
| H  | -2.54449600 | -2.53266900 | -1.16742900 |
| H  | 1.42541800  | -3.19243400 | 1.04070800  |
| C  | -0.83599200 | -1.38436200 | 2.22988600  |
| C  | 3.37421400  | -1.59622000 | 2.19609500  |
| H  | 3.94683600  | -0.67629500 | 1.95233900  |
| H  | 3.61584700  | -1.80726900 | 3.26477200  |
| H  | 3.74734800  | -2.44795200 | 1.59421300  |

#### 2<sub>Ti</sub> anti-S/cis-S

E: -1021.82148896 A.U.

|    |             |             |             |
|----|-------------|-------------|-------------|
| Ti | -0.08339000 | 0.44398700  | -0.30243500 |
| N  | -1.94236700 | -0.66855100 | -0.25411800 |
| N  | 0.36406800  | -1.11004600 | 0.56799000  |
| C  | -1.86600700 | -1.86753900 | 0.40708800  |
| C  | -3.00009100 | -2.67022800 | 0.60466100  |
| H  | -2.90443000 | -3.62826400 | 1.13845300  |
| C  | -4.24001400 | -2.24216300 | 0.10736800  |
| H  | -5.13924000 | -2.86316200 | 0.24343300  |
| C  | -4.31476000 | -1.01390400 | -0.57693300 |
| H  | -5.26472900 | -0.64529800 | -0.99185100 |
| C  | -3.14846300 | -0.26364500 | -0.74184700 |
| H  | -3.16981100 | 0.68945400  | -1.29338700 |
| C  | -0.48008600 | -2.24514900 | 0.87379800  |
| H  | -0.13177900 | -3.17142200 | 0.35931000  |
| C  | 1.77821900  | -0.97179200 | 0.54382000  |
| C  | 2.54645100  | -1.58922500 | -0.51402700 |
| C  | 3.91860500  | -1.30039400 | -0.58446900 |
| H  | 4.52320700  | -1.75505400 | -1.38530700 |
| C  | 4.53375600  | -0.44566800 | 0.35070400  |
| H  | 5.61031500  | -0.22922300 | 0.26449800  |
| C  | 3.79591000  | 0.10486000  | 1.40951800  |
| H  | 4.30502400  | 0.72539500  | 2.16416800  |
| C  | 2.42031500  | -0.16729400 | 1.55595600  |
| C  | 1.92711000  | -2.56160900 | -1.48736800 |
| H  | 1.92750000  | -3.58837900 | -1.05737200 |
| C  | 1.71292000  | 0.27109900  | 2.81665800  |
| H  | 0.61955500  | 0.10651300  | 2.77940000  |
| H  | 0.87681300  | -2.31721400 | -1.74508600 |
| H  | 2.51226100  | -2.62029800 | -2.42576900 |
| H  | 1.92025000  | 1.33190800  | 3.06720500  |
| H  | 2.09850400  | -0.32286700 | 3.67400900  |
| C  | -2.86329500 | 2.38059500  | 1.68378900  |
| H  | -3.21436100 | 2.76251100  | 0.70698200  |
| H  | -0.46953900 | -2.47667700 | 1.96535800  |
| H  | -3.46512300 | 1.50024200  | 1.99362700  |
| C  | -1.40570400 | 2.10102400  | 1.75307700  |
| C  | -0.45122700 | 2.42592500  | 0.81673700  |
| C  | 1.31622300  | 1.82086400  | -1.63650700 |
| H  | 2.39729500  | 1.84064700  | -1.41492700 |
| C  | 0.57293700  | 3.14518500  | -1.42606700 |
| H  | 0.27237800  | 3.54297500  | -2.42084100 |
| C  | 0.87109200  | 0.73374900  | -2.40550800 |
| H  | 1.62288500  | -0.03288200 | -2.66362100 |
| C  | -0.49331500 | 0.38877400  | -2.53041600 |
| H  | -1.25586700 | 1.19245100  | -2.55823400 |
| H  | -0.78770900 | -0.54101100 | -3.04098400 |
| H  | 1.30793800  | 3.86457900  | -1.01263800 |
| H  | -1.04749200 | 1.63862600  | 2.69190800  |
| H  | 0.61250000  | 2.32429300  | 1.14315000  |
| C  | -0.67565000 | 3.16448900  | -0.49964100 |

H -1.07003500 -2.90954300 1.22653700

**TS<sub>1-2Ti</sub> syn-P/cis-P**

E: -1021.77621387 A.U.

|    |             |             |             |
|----|-------------|-------------|-------------|
| Ti | -0.13739600 | 0.74075900  | -0.30676600 |
| N  | -1.96003000 | -0.46973400 | -0.27660200 |
| N  | 0.46824700  | -0.98521600 | 0.04999800  |
| C  | -1.75872800 | -1.80988900 | -0.11587700 |
| C  | -2.82366700 | -2.72466900 | -0.18241600 |
| H  | -2.63021600 | -3.79986100 | -0.04632700 |
| C  | -4.11876300 | -2.25103700 | -0.43657700 |
| H  | -4.96570400 | -2.95172400 | -0.50198200 |
| C  | -4.31809800 | -0.86801500 | -0.61200100 |
| H  | -5.31608000 | -0.45420300 | -0.82015100 |
| C  | -3.21761700 | -0.01226000 | -0.51821400 |
| H  | -3.33460500 | 1.07660300  | -0.64459300 |
| C  | -0.31985200 | -2.20467700 | 0.10044400  |
| H  | 0.00946700  | -2.93419000 | -0.67754700 |
| C  | 1.89675900  | -0.91940700 | 0.12826600  |
| C  | 2.67908500  | -0.96051100 | -1.08352800 |
| C  | 4.06870400  | -0.74773000 | -0.98266500 |
| H  | 4.68074400  | -0.76671400 | -1.89875500 |
| C  | 4.68749900  | -0.55897000 | 0.26176400  |
| H  | 5.77534400  | -0.39582700 | 0.31415900  |
| C  | 3.93267000  | -0.62648400 | 1.44639000  |
| H  | 4.43996000  | -0.54018400 | 2.42063600  |
| C  | 2.54262100  | -0.82659200 | 1.41305600  |
| C  | 2.10601100  | -1.34281400 | -2.43229900 |
| H  | 1.01942900  | -1.54640400 | -2.41325800 |
| C  | 1.79449900  | -1.02138900 | 2.71071900  |
| H  | 0.69556900  | -0.97591300 | 2.58986100  |
| H  | 2.31505600  | -0.57893100 | -3.21158400 |
| H  | 2.60202400  | -2.27086100 | -2.78813400 |
| H  | 2.10130200  | -0.28678800 | 3.48358800  |
| H  | 2.03115300  | -2.02310900 | 3.13199200  |
| C  | -1.53487300 | 1.10362200  | 2.22242700  |
| H  | -0.18527000 | -2.73047800 | 1.07646500  |
| H  | -0.94527000 | 0.26635500  | 2.64295700  |
| C  | -0.85258700 | 2.09604500  | 1.54645800  |
| C  | 0.59694100  | 2.12739900  | 1.38375700  |
| C  | 0.05479500  | 3.10978300  | -1.42557000 |
| H  | -0.24840300 | 4.15628000  | -1.25418200 |
| C  | 1.20173600  | 2.62950300  | -0.73479800 |
| H  | 1.73791000  | 1.71423000  | -1.09573700 |
| C  | -0.79721400 | 2.29309600  | -2.20646800 |
| H  | -1.73924900 | 2.74356500  | -2.56580000 |
| C  | -0.57920100 | 0.91486700  | -2.42215900 |
| H  | 0.47204600  | 0.53672300  | -2.46109100 |
| H  | -1.27105700 | 0.32167100  | -3.03833500 |
| H  | 1.91998400  | 3.35520200  | -0.32966300 |
| H  | -1.43262000 | 2.97052500  | 1.19412300  |
| H  | 1.18813900  | 1.35136900  | 1.90363700  |
| C  | -2.97838400 | 1.12750800  | 2.56009500  |
| H  | -3.46549800 | 0.14947200  | 2.35985600  |
| H  | -3.07085700 | 1.26793900  | 3.66376800  |
| H  | -3.53666300 | 1.94557100  | 2.06606500  |
| H  | 1.04452500  | 3.12335500  | 1.51027800  |

**1<sub>Ti</sub> syn-P/cis-S**

E: -1021.78852315 A.U.

|    |             |             |             |
|----|-------------|-------------|-------------|
| Ti | 0.02791600  | 0.31421400  | 0.59589600  |
| N  | -1.63505800 | -0.74991500 | -0.26191700 |
| N  | 0.70578400  | -0.27860900 | -1.02242400 |
| C  | -1.40485000 | -1.24384800 | -1.52014500 |
| C  | -2.43092200 | -1.84108700 | -2.26838200 |
| H  | -2.21648800 | -2.23479900 | -3.27386600 |
| C  | -3.72019400 | -1.92751600 | -1.72014600 |
| H  | -4.53599800 | -2.39930100 | -2.28995100 |
| C  | -3.95495800 | -1.40470000 | -0.43467200 |
| H  | -4.95123400 | -1.45044200 | 0.02977300  |
| C  | -2.88812300 | -0.83296400 | 0.26388300  |
| H  | -3.02653700 | -0.42936500 | 1.27954100  |
| C  | 0.01394800  | -1.08286600 | -2.01313700 |
| H  | 0.03325800  | -0.58748800 | -3.01300500 |
| C  | 2.10002300  | -0.09250100 | -0.81288600 |
| C  | 2.64704400  | 1.23323100  | -0.97034600 |
| C  | 3.96883400  | 1.46357300  | -0.53424400 |
| H  | 4.39981400  | 2.47247500  | -0.63413600 |
| C  | 4.75159900  | 0.42051400  | -0.02230600 |
| H  | 5.78322700  | 0.62005500  | 0.30759400  |
| C  | 4.24121000  | -0.89176800 | 0.04014500  |
| H  | 4.88613500  | -1.70697000 | 0.40512500  |
| C  | 2.92624400  | -1.18461100 | -0.35254600 |
| C  | 1.91702900  | 2.33658500  | -1.70238900 |
| H  | 0.87783900  | 2.06412200  | -1.96593500 |
| C  | 2.44288500  | -2.61503200 | -0.32251800 |
| H  | 1.35487700  | -2.71495000 | -0.13722200 |
| H  | 1.91951400  | 3.29214600  | -1.13776500 |
| H  | 2.44605000  | 2.54885300  | -2.65657700 |
| H  | 2.97845300  | -3.20217700 | 0.44872800  |
| H  | 2.65085800  | -3.11348600 | -1.29566300 |
| C  | -0.18622500 | -1.43769500 | 2.26636500  |
| H  | 0.49782200  | -2.07648500 | -2.15878100 |
| H  | 0.59805300  | -1.93920900 | 1.65452400  |
| C  | 0.18926100  | -0.24295900 | 2.89377800  |
| C  | 1.29859900  | 0.50939000  | 2.43083200  |
| C  | -1.61538700 | 2.70213000  | -0.37553000 |
| H  | -1.12346400 | 2.84412100  | -1.35596300 |
| C  | -0.79781600 | 2.42434800  | 0.70969800  |
| H  | -1.21194700 | 2.38839500  | 1.73756900  |
| C  | -3.06048100 | 2.83186400  | -0.38328400 |
| H  | -3.55288900 | 2.76246900  | -1.36840300 |
| C  | -3.81136800 | 3.15302100  | 0.70727000  |
| H  | -3.36804600 | 3.33804200  | 1.70073400  |
| H  | -4.90037400 | 3.29939000  | 0.61988100  |
| H  | 0.28363200  | 2.68466000  | 0.62962500  |
| H  | -0.53659500 | 0.22991100  | 3.58521400  |
| H  | 2.20274800  | -0.02301900 | 2.08068200  |
| C  | -1.33078700 | -2.31015900 | 2.68627300  |
| H  | -1.81160700 | -2.82695300 | 1.83147000  |
| H  | -0.94706400 | -3.11401600 | 3.35468800  |
| H  | -2.09859900 | -1.75481200 | 3.26173400  |
| H  | 1.48595000  | 1.51410000  | 2.84678400  |

**TS<sub>1-2Ti</sub> syn-P/cis-S**

E: -1021.79016348 A.U.

|    |             |             |             |
|----|-------------|-------------|-------------|
| Ti | -0.13914800 | 0.75991500  | 0.06967400  |
| N  | -1.87788200 | -0.50304900 | -0.37680400 |
| N  | 0.53435500  | -0.96084500 | 0.13761300  |
| C  | -1.60586800 | -1.84288200 | -0.41518500 |
| C  | -2.58799100 | -2.78714600 | -0.75520600 |

|   |             |             |             |
|---|-------------|-------------|-------------|
| H | -2.33213400 | -3.85772600 | -0.77472400 |
| C | -3.88246400 | -2.34869900 | -1.07100500 |
| H | -4.66479700 | -3.07205800 | -1.34900300 |
| C | -4.16511700 | -0.97142500 | -1.01668400 |
| H | -5.16858700 | -0.58226900 | -1.24502200 |
| C | -3.14513900 | -0.08718700 | -0.65508000 |
| H | -3.34013000 | 0.99241200  | -0.57420700 |
| C | -0.18224000 | -2.20699700 | -0.07277800 |
| H | 0.28357600  | -2.80619400 | -0.88902000 |
| C | 1.95510100  | -0.80757300 | 0.05559600  |
| C | 2.56169100  | -0.66157500 | -1.24635700 |
| C | 3.95090300  | -0.45030500 | -1.31141700 |
| H | 4.43308400  | -0.32845800 | -2.29461700 |
| C | 4.73443300  | -0.43247100 | -0.14490400 |
| H | 5.82078200  | -0.26724100 | -0.21875000 |
| C | 4.14855300  | -0.66340500 | 1.11070200  |
| H | 4.78422200  | -0.69690700 | 2.00993900  |
| C | 2.76414600  | -0.87781200 | 1.24213200  |
| C | 1.78077500  | -0.85611500 | -2.52426300 |
| H | 0.69359400  | -0.65419700 | -2.42344300 |
| C | 2.19601600  | -1.24635500 | 2.58925100  |
| H | 1.09323900  | -1.32810800 | 2.58433300  |
| H | 2.18169000  | -0.23441400 | -3.34979400 |
| H | 1.87120600  | -1.91137200 | -2.86618300 |
| H | 2.49876000  | -0.52565000 | 3.37812000  |
| H | 2.59966100  | -2.23136300 | 2.90955500  |
| C | -1.60164400 | 0.45947400  | 2.41889100  |
| H | -0.14488700 | -2.85515800 | 0.83647300  |
| H | -0.99216400 | -0.44166800 | 2.62549400  |
| C | -0.93097600 | 1.63777000  | 2.13082100  |
| C | 0.49097000  | 1.70873700  | 1.87396400  |
| C | 0.24279500  | 2.18227100  | -2.02320500 |
| H | 0.36178600  | 1.60500700  | -2.95567200 |
| C | 1.37051100  | 2.51262300  | -1.32323500 |
| H | 1.35163400  | 3.13771700  | -0.41333000 |
| C | -1.14999800 | 2.50119200  | -1.65798200 |
| H | -1.92041200 | 2.03511200  | -2.29596900 |
| C | -1.54974600 | 3.35108400  | -0.66702000 |
| H | -0.83837200 | 3.93499800  | -0.05789300 |
| H | -2.61933000 | 3.55243800  | -0.49279700 |
| H | 2.36666400  | 2.21569800  | -1.68527500 |
| H | -1.54631400 | 2.54905200  | 2.00877500  |
| H | 1.14581900  | 1.01204000  | 2.42458600  |
| C | -3.06471300 | 0.33823700  | 2.66076200  |
| H | -3.50237200 | -0.54866600 | 2.15561100  |
| H | -3.22850300 | 0.16015800  | 3.74963200  |
| H | -3.63072900 | 1.24810300  | 2.38123800  |
| H | 0.92895500  | 2.71920300  | 1.77665400  |

#### 1Ti syn-S/cis-P

E: -1021.79203260 A.U.

|    |             |             |             |
|----|-------------|-------------|-------------|
| Ti | 0.25521800  | 0.84923700  | 0.16667800  |
| N  | 2.02481800  | -0.45039900 | 0.14198200  |
| N  | -0.45411600 | -0.79774800 | -0.32385800 |
| C  | 1.76233900  | -1.71963500 | -0.28511400 |
| C  | 2.76271700  | -2.70562700 | -0.32972500 |
| H  | 2.51547800  | -3.71826400 | -0.68391400 |
| C  | 4.06015900  | -2.38659300 | 0.09444200  |
| H  | 4.85654100  | -3.14681300 | 0.07620600  |
| C  | 4.32436500  | -1.08153000 | 0.55078700  |
| H  | 5.32516700  | -0.78770000 | 0.90106100  |

|   |             |             |             |
|---|-------------|-------------|-------------|
| C | 3.28795200  | -0.14484900 | 0.55003800  |
| H | 3.46489200  | 0.88709400  | 0.89263900  |
| C | 0.32752600  | -1.98074800 | -0.66559800 |
| H | -0.06718800 | -2.87659200 | -0.13237400 |
| C | -1.88478300 | -0.79388500 | -0.28787000 |
| C | -2.55312000 | -1.17881900 | 0.93307300  |
| C | -3.95669200 | -1.10648600 | 0.97549000  |
| H | -4.48266000 | -1.39296100 | 1.90038900  |
| C | -4.69624100 | -0.71174700 | -0.15100500 |
| H | -5.79479000 | -0.65792100 | -0.09456100 |
| C | -4.04484100 | -0.43706800 | -1.36566000 |
| H | -4.64160900 | -0.19705300 | -2.26024500 |
| C | -2.64433800 | -0.49604700 | -1.47477400 |
| C | -1.82009200 | -1.76268400 | 2.11977200  |
| H | -0.72029300 | -1.77138000 | 1.99827100  |
| C | -2.01149500 | -0.33069000 | -2.83455400 |
| H | -0.91381400 | -0.45468400 | -2.82008400 |
| H | -2.07153500 | -1.24326100 | 3.07051400  |
| H | -2.13634000 | -2.81688900 | 2.27300800  |
| H | -2.25018500 | 0.65475600  | -3.28850800 |
| H | -2.42346500 | -1.09130100 | -3.53110100 |
| C | 1.78263800  | 1.96140400  | -1.46282300 |
| H | 0.23995500  | -2.21592600 | -1.75400400 |
| H | 1.95845600  | 2.65025700  | -0.59905200 |
| C | 0.48103500  | 1.89066500  | -1.95532000 |
| C | -0.62022100 | 2.36725100  | -1.19432100 |
| C | -0.47227000 | 2.52216600  | 1.93906500  |
| H | -0.44320300 | 3.56294200  | 1.57531000  |
| C | -1.66690600 | 1.85128200  | 1.91532500  |
| H | -1.80302700 | 0.87170300  | 2.39885400  |
| C | 0.79870600  | 1.97363800  | 2.43214900  |
| H | 1.64209500  | 2.68433200  | 2.49993700  |
| C | 1.01438300  | 0.66164500  | 2.75111800  |
| H | 0.20474800  | -0.09047800 | 2.75970900  |
| H | 1.99787600  | 0.31504500  | 3.10276600  |
| H | -2.56881300 | 2.32263500  | 1.49450500  |
| H | 0.30810300  | 1.28111200  | -2.85953000 |
| H | -0.47490600 | 3.30329400  | -0.62599100 |
| C | 2.99335900  | 1.52060900  | -2.22238800 |
| H | 3.41404600  | 2.39958900  | -2.76289400 |
| H | 3.80861600  | 1.14410500  | -1.57433500 |
| H | 2.74884800  | 0.75332600  | -2.98355600 |
| H | -1.64779500 | 2.21131800  | -1.55944900 |

#### TS1-2Ti syn-S/cis-P

E: -1021.77861477 A.U.

|    |             |             |             |
|----|-------------|-------------|-------------|
| Ti | -0.14599100 | 0.57993100  | -0.37675900 |
| N  | -1.85430700 | -0.76017400 | -0.15351400 |
| N  | 0.60806300  | -1.05137700 | 0.08979900  |
| C  | -1.53741100 | -2.05428300 | 0.15350300  |
| C  | -2.52403700 | -3.04918800 | 0.25105600  |
| H  | -2.23590700 | -4.08072500 | 0.50552800  |
| C  | -3.86346100 | -2.71314300 | 0.00896500  |
| H  | -4.65143800 | -3.47952800 | 0.07491700  |
| C  | -4.18290100 | -1.38434900 | -0.32953900 |
| H  | -5.21878900 | -1.08034500 | -0.54152700 |
| C  | -3.15474000 | -0.44127300 | -0.39565200 |
| H  | -3.36388200 | 0.60583800  | -0.66153700 |
| C  | -0.06481400 | -2.31168700 | 0.34159700  |
| H  | 0.28844700  | -3.10775200 | -0.35659000 |
| C  | 2.01128700  | -0.80952900 | 0.19574200  |

|   |             |             |             |
|---|-------------|-------------|-------------|
| C | 2.82727900  | -0.82162100 | -0.99433400 |
| C | 4.18118700  | -0.44594700 | -0.87294500 |
| H | 4.81815100  | -0.43967300 | -1.77203000 |
| C | 4.73912100  | -0.13396200 | 0.37458000  |
| H | 5.80067800  | 0.15082000  | 0.44440700  |
| C | 3.96214300  | -0.22650900 | 1.54547200  |
| H | 4.42915800  | -0.03385600 | 2.52448200  |
| C | 2.60420300  | -0.57654100 | 1.49092600  |
| C | 2.33991900  | -1.34618400 | -2.32787800 |
| H | 1.28476400  | -1.67599700 | -2.31369200 |
| C | 1.83056000  | -0.76923800 | 2.77370500  |
| H | 1.96889400  | -1.80853800 | 3.14735300  |
| H | 2.47988400  | -0.61090400 | -3.14914600 |
| H | 2.95147200  | -2.22798800 | -2.61518600 |
| H | 0.73990800  | -0.61345700 | 2.65985900  |
| H | 2.19999700  | -0.10275100 | 3.57807200  |
| C | -2.01795100 | 2.44126400  | 1.38229700  |
| H | 0.15055600  | -2.69287100 | 1.36816300  |
| H | -1.88414400 | 3.45143800  | 0.94975600  |
| C | -0.87559700 | 1.68764000  | 1.60882500  |
| C | 0.45738300  | 2.15036800  | 1.29097700  |
| C | -0.34636500 | 2.84342800  | -1.60112300 |
| H | -0.81216500 | 3.83317800  | -1.46233300 |
| C | 0.89241500  | 2.59024000  | -0.95845200 |
| H | 1.55152100  | 1.75135600  | -1.30009900 |
| C | -1.07787200 | 1.85909300  | -2.31613100 |
| H | -2.10249000 | 2.11864400  | -2.63492800 |
| C | -0.61415700 | 0.54165900  | -2.50856400 |
| H | 0.48212200  | 0.35889300  | -2.59464400 |
| H | -1.22495400 | -0.20357800 | -3.03960500 |
| H | 1.49941700  | 3.43287000  | -0.60010800 |
| H | -0.99344100 | 0.70724300  | 2.11335400  |
| H | 0.59661300  | 3.23989300  | 1.27462900  |
| C | -3.39110000 | 2.08668400  | 1.81210700  |
| H | -3.65668700 | 2.74845400  | 2.67312700  |
| H | -4.15181900 | 2.33090800  | 1.03998500  |
| H | -3.49784400 | 1.03783800  | 2.14892100  |
| H | 1.31696400  | 1.61143400  | 1.72275900  |

#### 1Ti syn-S/cis-S

E: -1021.78928041 A.U.

|    |             |             |             |
|----|-------------|-------------|-------------|
| Ti | -0.14209600 | 0.74432600  | 0.00573200  |
| N  | -1.85987200 | -0.59215700 | -0.31307800 |
| N  | 0.55530200  | -0.94143000 | 0.25988500  |
| C  | -1.57106400 | -1.91913000 | -0.14954500 |
| C  | -2.53212300 | -2.91947600 | -0.36730300 |
| H  | -2.26160800 | -3.97653600 | -0.22109000 |
| C  | -3.82149300 | -2.55554500 | -0.78108500 |
| H  | -4.58718100 | -3.32491200 | -0.96641200 |
| C  | -4.11822700 | -1.19122400 | -0.95278900 |
| H  | -5.11608900 | -0.85711800 | -1.27413900 |
| C  | -3.12096200 | -0.24657400 | -0.69679300 |
| H  | -3.33104300 | 0.82820100  | -0.79701500 |
| C  | -0.14695900 | -2.21242500 | 0.25364800  |
| H  | 0.32941700  | -2.92828700 | -0.45522600 |
| C  | 1.97116000  | -0.77437600 | 0.14406400  |
| C  | 2.55846900  | -0.77948100 | -1.17621800 |
| C  | 3.94136300  | -0.55122800 | -1.28729000 |
| H  | 4.40949800  | -0.54386800 | -2.28469200 |
| C  | 4.73802300  | -0.37311200 | -0.14284800 |
| H  | 5.81972300  | -0.19730300 | -0.25258300 |

|   |             |             |             |
|---|-------------|-------------|-------------|
| C | 4.17314000  | -0.45961800 | 1.14065200  |
| H | 4.82118900  | -0.37110400 | 2.02724600  |
| C | 2.79563600  | -0.68388100 | 1.31905200  |
| C | 1.76261100  | -1.14496900 | -2.40633600 |
| H | 0.67633300  | -0.93036100 | -2.32177900 |
| C | 2.25280000  | -0.89546600 | 2.70939100  |
| H | 1.15645300  | -1.03352100 | 2.72833700  |
| H | 2.15455700  | -0.64210600 | -3.31297000 |
| H | 1.84919100  | -2.23727400 | -2.60196900 |
| H | 2.52114200  | -0.06205100 | 3.39221800  |
| H | 2.70951000  | -1.80686600 | 3.15202800  |
| C | -1.98798200 | 1.50103800  | 1.98949100  |
| H | -0.10756800 | -2.70262700 | 1.25637000  |
| H | -2.18588700 | 2.43291400  | 1.42215000  |
| C | -0.67234600 | 1.20674200  | 2.30349200  |
| C | 0.46105900  | 1.86766000  | 1.70818600  |
| C | 0.23478500  | 1.93499600  | -2.25777300 |
| H | 0.36944100  | 1.29146200  | -3.14378000 |
| C | 1.34747000  | 2.29422500  | -1.54774700 |
| H | 1.31709700  | 2.98243500  | -0.68311600 |
| C | -1.16149600 | 2.28667000  | -1.94794300 |
| H | -1.92298600 | 1.75257900  | -2.54181800 |
| C | -1.57628100 | 3.24622900  | -1.06906600 |
| H | -0.87540900 | 3.90338100  | -0.52618300 |
| H | -2.64862500 | 3.46630400  | -0.93969500 |
| H | 2.34967200  | 1.97193600  | -1.86765600 |
| H | -0.48753700 | 0.33494800  | 2.95679500  |
| H | 0.28730900  | 2.91544900  | 1.37731500  |
| C | -3.17837700 | 0.78808500  | 2.53300300  |
| H | -3.67604300 | 1.44361000  | 3.28512600  |
| H | -3.95071500 | 0.59881500  | 1.75797900  |
| H | -2.91800000 | -0.16563500 | 3.03167700  |
| H | 1.46101100  | 1.70261900  | 2.13966700  |

#### 2Ti syn-P/cis-P

E: -1021.81319132 A.U.

|    |             |             |             |
|----|-------------|-------------|-------------|
| Ti | -0.05654200 | -0.49263400 | -0.16798800 |
| N  | 1.58443300  | 0.93847400  | -0.33377400 |
| N  | -0.60042500 | 1.03933100  | 0.80744200  |
| C  | 1.44537200  | 2.10836300  | 0.36399000  |
| C  | 2.46106200  | 3.07691700  | 0.40531200  |
| H  | 2.30971500  | 4.00100600  | 0.98397700  |
| C  | 3.64843500  | 2.85521600  | -0.30529900 |
| H  | 4.45450000  | 3.60547300  | -0.29542000 |
| C  | 3.78624100  | 1.66221700  | -1.03998500 |
| H  | 4.69439300  | 1.44936100  | -1.62349100 |
| C  | 2.74129400  | 0.73665700  | -1.02885400 |
| H  | 2.81789100  | -0.19843100 | -1.60053400 |
| C  | 0.11486600  | 2.26901000  | 1.04776300  |
| H  | -0.41281500 | 3.16716900  | 0.66187700  |
| C  | -1.96151400 | 0.76207600  | 0.67097600  |
| C  | -2.97064500 | 1.61705500  | 0.09945100  |
| C  | -4.19483900 | 1.01792800  | -0.23276600 |
| H  | -4.98443600 | 1.65230300  | -0.66698900 |
| C  | -4.45075200 | -0.36385000 | -0.06005800 |
| H  | -5.42688500 | -0.77751300 | -0.35642200 |
| C  | -3.49078700 | -1.18350100 | 0.53006400  |
| H  | -3.71569700 | -2.24097200 | 0.74094100  |
| C  | -2.25129700 | -0.63106800 | 0.94887700  |
| C  | -2.76111700 | 3.08870400  | -0.16164000 |
| H  | -1.93500800 | 3.27523800  | -0.88150600 |

|   |             |             |             |
|---|-------------|-------------|-------------|
| C | -1.34843400 | -1.41952400 | 1.86457700  |
| H | -0.30133400 | -1.67455700 | 1.49078400  |
| H | -3.67432800 | 3.53791300  | -0.59568600 |
| H | -2.53775100 | 3.65044800  | 0.76991500  |
| H | -1.77557100 | -2.41750400 | 2.08357300  |
| H | -1.15053900 | -0.88251700 | 2.81426100  |
| C | 1.98331500  | -2.16101300 | 1.77604800  |
| H | 0.24735500  | 2.43747500  | 2.14326500  |
| H | 1.33191100  | -2.75977800 | 2.44454400  |
| C | 1.93014600  | -2.41819700 | 0.43282700  |
| C | 1.11525600  | -3.51810000 | -0.22817700 |
| C | 0.76568300  | -1.86666100 | -2.11037600 |
| H | 1.78559800  | -2.09470500 | -2.46570200 |
| C | 0.12087900  | -2.93585100 | -1.25981800 |
| H | -0.81642700 | -2.55933500 | -0.74738900 |
| C | 0.15178600  | -0.70939600 | -2.56203500 |
| H | 0.75950200  | -0.01240300 | -3.16555300 |
| C | -1.11799400 | -0.26560200 | -2.05567900 |
| H | -1.95504900 | -0.98600900 | -1.98790600 |
| H | -1.44817300 | 0.74874100  | -2.33550600 |
| H | -0.31514000 | -3.73201900 | -1.90973800 |
| H | 2.69008200  | -1.92248800 | -0.19796600 |
| H | 0.57865700  | -4.13327800 | 0.52317900  |
| C | 2.91692000  | -1.21631400 | 2.45569300  |
| H | 2.38195600  | -0.54252600 | 3.15866100  |
| H | 3.61834400  | -1.80137800 | 3.09344200  |
| H | 3.51868200  | -0.61678600 | 1.74583500  |
| H | 1.81315100  | -4.20998900 | -0.74973100 |

#### 2Ti syn-P/cis-S

E: -1021.82702768 A.U.

|    |             |             |             |
|----|-------------|-------------|-------------|
| Ti | -0.09642900 | 0.52172000  | -0.43910700 |
| N  | -2.06142600 | -0.42457400 | -0.29865000 |
| N  | 0.18745400  | -0.95751800 | 0.62849600  |
| C  | -2.09759700 | -1.54988800 | 0.47899100  |
| C  | -3.29781400 | -2.23328400 | 0.73323800  |
| H  | -3.28851400 | -3.13864600 | 1.35949700  |
| C  | -4.49159300 | -1.75337400 | 0.17577100  |
| H  | -5.44218100 | -2.27981300 | 0.35432400  |
| C  | -4.45295700 | -0.59285300 | -0.61984400 |
| H  | -5.36388300 | -0.18247700 | -1.08063600 |
| C  | -3.22463200 | 0.03589400  | -0.83702600 |
| H  | -3.16203400 | 0.93265700  | -1.47228800 |
| C  | -0.75639900 | -1.98791900 | 1.01205500  |
| H  | -0.47183900 | -2.98304700 | 0.59753900  |
| C  | 1.61027700  | -1.01611200 | 0.59134400  |
| C  | 2.26696400  | -1.78662000 | -0.44116000 |
| C  | 3.66408400  | -1.69481000 | -0.54183600 |
| H  | 4.18542900  | -2.26346300 | -1.32820900 |
| C  | 4.40907300  | -0.89743900 | 0.34852900  |
| H  | 5.50357000  | -0.83700800 | 0.24045800  |
| C  | 3.77438200  | -0.21696200 | 1.39832900  |
| H  | 4.37892300  | 0.34406000  | 2.12892800  |
| C  | 2.37718400  | -0.28716500 | 1.57075200  |
| C  | 1.50614400  | -2.71366000 | -1.35761100 |
| H  | 0.48264800  | -2.36051600 | -1.59653600 |
| C  | 1.76239600  | 0.27294600  | 2.83132200  |
| H  | 0.66752400  | 0.12609100  | 2.87563200  |
| H  | 2.04906600  | -2.87521100 | -2.30951100 |
| H  | 1.40289800  | -3.71756300 | -0.88787100 |
| H  | 1.99854400  | 1.34814800  | 2.97836300  |

|   |             |             |             |
|---|-------------|-------------|-------------|
| H | 2.19704100  | -0.25053900 | 3.70987800  |
| C | -1.04916500 | 2.20470900  | 1.59065400  |
| H | -0.78199500 | -2.11656100 | 2.12038400  |
| H | -0.25793300 | 2.00546900  | 2.33815100  |
| C | -0.65383200 | 2.64898300  | 0.35023700  |
| C | 0.76296600  | 3.06541900  | -0.02515200 |
| C | 1.54221100  | 1.34571500  | -1.85946300 |
| H | 2.59412300  | 1.05834100  | -1.68643900 |
| C | 1.17592400  | 2.78217000  | -1.51222000 |
| H | 0.38201900  | 3.16809300  | -2.18762200 |
| C | 0.75418900  | 0.46460600  | -2.61555600 |
| H | 1.22962900  | -0.46691800 | -2.96771200 |
| C | -0.65623700 | 0.52660400  | -2.60792400 |
| H | -1.15234400 | 1.51845900  | -2.51446400 |
| H | -1.25459900 | -0.24387100 | -3.11647000 |
| H | 2.07903900  | 3.39572400  | -1.71288800 |
| H | -1.44865300 | 2.94831300  | -0.36701200 |
| H | 1.51101800  | 2.65212500  | 0.69012800  |
| C | -2.45191000 | 2.06611600  | 2.06567500  |
| H | -2.62799100 | 1.08509800  | 2.55509900  |
| H | -2.61737700 | 2.82297500  | 2.86803600  |
| H | -3.20576200 | 2.23912800  | 1.27425600  |
| H | 0.81093700  | 4.16929700  | 0.11379900  |

#### 2Ti syn-S/cis-P

E: -1021.81128377 A.U.

|    |             |             |             |
|----|-------------|-------------|-------------|
| Ti | -0.05249400 | -0.49147600 | -0.08982200 |
| N  | 1.57813400  | 0.98385000  | -0.27136300 |
| N  | -0.64106400 | 1.07668000  | 0.80623800  |
| C  | 1.39393400  | 2.17215800  | 0.38369800  |
| C  | 2.38134900  | 3.17036600  | 0.41765200  |
| H  | 2.19020900  | 4.10649800  | 0.96435500  |
| C  | 3.58955900  | 2.96279200  | -0.26029000 |
| H  | 4.37430700  | 3.73532400  | -0.25630600 |
| C  | 3.77382500  | 1.75304800  | -0.95604400 |
| H  | 4.69887700  | 1.54785200  | -1.51526600 |
| C  | 2.75549300  | 0.79863500  | -0.93684300 |
| H  | 2.87792300  | -0.15099800 | -1.47398300 |
| C  | 0.04460600  | 2.32516300  | 1.02840700  |
| H  | -0.49012600 | 3.20261300  | 0.60653400  |
| C  | -1.99237700 | 0.77904800  | 0.64089200  |
| C  | -2.99954200 | 1.59913500  | 0.01597000  |
| C  | -4.20491300 | 0.96801800  | -0.32493300 |
| H  | -4.99277200 | 1.57327600  | -0.80185000 |
| C  | -4.44468500 | -0.41135700 | -0.10968100 |
| H  | -5.40715100 | -0.84951600 | -0.41548100 |
| C  | -3.48912000 | -1.19555300 | 0.53322000  |
| H  | -3.70434200 | -2.24780800 | 0.77767000  |
| C  | -2.27019900 | -0.60694700 | 0.96301000  |
| C  | -2.80577800 | 3.06357800  | -0.29214200 |
| H  | -1.95820300 | 3.23866200  | -0.98941200 |
| C  | -1.36767500 | -1.33754400 | 1.92191500  |
| H  | -0.34444000 | -1.67675500 | 1.53091400  |
| H  | -3.71084600 | 3.48015500  | -0.77325900 |
| H  | -2.62480300 | 3.66285000  | 0.62518700  |
| H  | -1.80846500 | -2.30639700 | 2.22935500  |
| H  | -1.12536000 | -0.73445300 | 2.81922700  |
| C  | 2.48177300  | -1.92724800 | 0.98503000  |
| H  | 0.14611600  | 2.52359700  | 2.12235100  |
| H  | 3.09442900  | -1.80023600 | 0.07359800  |
| C  | 1.48055400  | -2.85937500 | 0.95874000  |

|   |             |             |             |
|---|-------------|-------------|-------------|
| C | 1.09976000  | -3.72910800 | -0.22700600 |
| C | 0.88911400  | -1.84142100 | -1.91699500 |
| H | 1.94525000  | -2.02527500 | -2.17755000 |
| C | 0.18485400  | -2.98069000 | -1.21837400 |
| H | -0.76599900 | -2.65184000 | -0.70067500 |
| C | 0.26004100  | -0.71739100 | -2.44033200 |
| H | 0.88332800  | 0.01239400  | -2.98613300 |
| C | -1.05920300 | -0.33347600 | -2.03900300 |
| H | -1.86056100 | -1.09325800 | -1.97901500 |
| H | -1.42313100 | 0.65950900  | -2.35007300 |
| H | -0.22901900 | -3.67131300 | -1.99357200 |
| H | 0.98602200  | -3.09387300 | 1.92059000  |
| H | 2.00983500  | -4.06806600 | -0.76640500 |
| C | 2.95118400  | -1.20016700 | 2.20805100  |
| H | 3.93874100  | -1.61378300 | 2.51445200  |
| H | 3.12832900  | -0.12129900 | 2.01755900  |
| H | 2.26151800  | -1.31374000 | 3.06813500  |
| H | 0.59036400  | -4.64532500 | 0.13134400  |

### 2Ti syn-S/cis-S

E: -1021.82499783 A.U.

|    |             |             |             |
|----|-------------|-------------|-------------|
| Ti | 0.22405100  | 0.56374500  | 0.33528600  |
| N  | 2.27034000  | -0.10552400 | 0.14637900  |
| N  | 0.06943500  | -1.26222900 | 0.22491200  |
| C  | 2.42266100  | -1.46103300 | 0.03923700  |
| C  | 3.68729200  | -2.04363600 | -0.13527100 |
| H  | 3.78080900  | -3.13800700 | -0.20935000 |
| C  | 4.81742700  | -1.21582800 | -0.21533700 |
| H  | 5.81847200  | -1.65347200 | -0.35385600 |
| C  | 4.65590700  | 0.17877600  | -0.10649100 |
| H  | 5.51689600  | 0.86189300  | -0.15616100 |
| C  | 3.37245900  | 0.69393500  | 0.08770400  |
| H  | 3.21294400  | 1.77719000  | 0.21199600  |
| C  | 1.13298400  | -2.24623800 | 0.12376500  |
| H  | 1.14488600  | -2.93018100 | 1.00587900  |
| C  | -1.29378400 | -1.36766000 | -0.17000900 |
| C  | -2.29943500 | -1.72856900 | 0.79749900  |
| C  | -3.64107200 | -1.74067400 | 0.37577400  |
| H  | -4.42872400 | -2.00851000 | 1.09810800  |
| C  | -3.99001500 | -1.44554500 | -0.95378800 |
| H  | -5.04892300 | -1.46747600 | -1.25650100 |
| C  | -2.99994500 | -1.15881700 | -1.90997400 |
| H  | -3.28814200 | -0.98177700 | -2.95845000 |
| C  | -1.63907200 | -1.13859500 | -1.55466900 |
| C  | -1.94557200 | -2.17444700 | 2.19224700  |
| H  | -0.90084000 | -1.94239200 | 2.47157600  |
| C  | -0.57971700 | -1.01162000 | -2.62289800 |
| H  | 0.36299200  | -0.54031000 | -2.27051300 |
| H  | -2.62935500 | -1.74057500 | 2.95027700  |
| H  | -2.06643400 | -3.27763600 | 2.27021000  |
| H  | -0.94754800 | -0.44427300 | -3.49958700 |
| H  | -0.29874600 | -2.02033200 | -2.99996300 |
| C  | 0.11688600  | 2.45610900  | -1.25383600 |
| H  | 0.99517100  | -2.89533000 | -0.77128800 |
| H  | 0.58568900  | 2.98332000  | -0.38937000 |
| C  | -1.24802600 | 2.31391200  | -1.24183500 |
| C  | -2.18734600 | 2.76416100  | -0.15498300 |
| C  | -1.39827800 | 1.43895900  | 1.88343100  |
| H  | -2.33464500 | 0.87341600  | 2.03053800  |
| C  | -1.59002200 | 2.81212500  | 1.26570200  |
| H  | -0.66844800 | 3.43041100  | 1.30520800  |

|   |             |            |             |
|---|-------------|------------|-------------|
| C | -0.27276700 | 0.97395700 | 2.57718800  |
| H | -0.39999600 | 0.06617300 | 3.19200100  |
| C | 1.05148600  | 1.35311400 | 2.24968700  |
| H | 1.25637000  | 2.37981900 | 1.87786400  |
| H | 1.89713700  | 0.87569700 | 2.76650600  |
| H | -2.31329900 | 3.34457700 | 1.92579100  |
| H | -1.72333600 | 1.90968800 | -2.15528900 |
| H | -2.54777700 | 3.77824300 | -0.45284900 |
| C | 1.00467400  | 2.26099300 | -2.45678000 |
| H | 1.39723600  | 3.25459300 | -2.76990600 |
| H | 1.90073400  | 1.63750600 | -2.25156500 |
| H | 0.45746800  | 1.83073300 | -3.31648900 |
| H | -3.09849000 | 2.12860800 | -0.16832000 |

### Titanium – Path 3

### 1Ti anti-S/trans-P

E: -1021.79474475 A.U.

|    |             |             |             |
|----|-------------|-------------|-------------|
| Ti | 0.18117400  | 0.69825600  | 0.55189900  |
| N  | 2.08660300  | -0.35242200 | 0.16806300  |
| N  | -0.23354700 | -0.44868000 | -0.84161600 |
| C  | 2.03458600  | -1.21371900 | -0.88980400 |
| C  | 3.14780700  | -1.98261200 | -1.27293900 |
| H  | 3.06963100  | -2.66393300 | -2.13423900 |
| C  | 4.33839000  | -1.87814200 | -0.54177000 |
| H  | 5.21920600  | -2.47809900 | -0.81873700 |
| C  | 4.38776500  | -0.99347700 | 0.55334800  |
| H  | 5.30082600  | -0.87642200 | 1.15597400  |
| C  | 3.25116500  | -0.24635400 | 0.86772400  |
| H  | 3.27014200  | 0.47219800  | 1.70254400  |
| C  | 0.69808400  | -1.28221500 | -1.58700100 |
| H  | 0.33503200  | -2.33307500 | -1.64420700 |
| C  | -1.64061700 | -0.66795300 | -0.75050600 |
| C  | -2.13301200 | -1.75854100 | 0.05986700  |
| C  | -3.52344600 | -1.89130300 | 0.21483900  |
| H  | -3.92042100 | -2.71154300 | 0.83426200  |
| C  | -4.41677200 | -1.01424400 | -0.43171800 |
| H  | -5.50204400 | -1.13890200 | -0.29064000 |
| C  | -3.93452700 | -0.01932600 | -1.29398600 |
| H  | -4.64545200 | 0.61185900  | -1.85085000 |
| C  | -2.55089500 | 0.15624700  | -1.50451300 |
| C  | -1.21936700 | -2.80972700 | 0.64940100  |
| H  | -0.19506200 | -2.44629900 | 0.86412000  |
| C  | -2.09217200 | 1.08622300  | -2.59843300 |
| H  | -0.99179300 | 1.12186500  | -2.69914600 |
| H  | -1.64197200 | -3.24194600 | 1.57884300  |
| H  | -1.11930200 | -3.66213400 | -0.05907000 |
| H  | -2.47873900 | 2.11766600  | -2.46173900 |
| H  | -2.50242500 | 0.73418900  | -3.56940700 |
| C  | 2.05766700  | 2.46420500  | -0.50525800 |
| H  | 0.78524200  | -0.93387400 | -2.64473300 |
| H  | 3.03585600  | 2.51652100  | 0.00523500  |
| C  | 0.95090000  | 2.86169200  | 0.23841500  |
| C  | -0.42076100 | 2.70280700  | -0.15395700 |
| C  | -1.23174000 | 1.17521800  | 2.59064900  |
| H  | -0.66985300 | 2.03739400  | 3.00094000  |
| C  | -2.43541800 | 1.85338200  | 1.97403900  |
| H  | -3.04230800 | 0.54442900  | 1.59557900  |
| C  | -0.64361700 | -0.15280800 | 2.73102100  |

|   |             |             |             |
|---|-------------|-------------|-------------|
| H | -1.30422100 | -1.02157900 | 2.56949500  |
| C | 0.69280300  | -0.34655600 | 2.95082600  |
| H | 1.35581300  | 0.50766800  | 3.19095700  |
| H | 1.13363900  | -1.35302700 | 3.01739900  |
| H | -2.86008100 | 2.39725500  | 1.87820700  |
| H | 1.15784500  | 3.21740300  | 1.26927200  |
| H | -1.17527500 | 3.25642300  | 0.42249200  |
| C | 2.11353400  | 2.18218100  | -1.96790200 |
| H | 2.61523700  | 3.04876300  | -2.46021400 |
| H | 2.75849700  | 1.30851600  | -2.19837300 |
| H | 1.12482000  | 2.05664900  | -2.44778700 |
| H | -0.65219700 | 2.61624100  | -1.22714200 |

#### TS<sub>1-2Ti</sub> anti-S/trans-P

E: -1021.77748180 A.U.

|    |             |             |             |
|----|-------------|-------------|-------------|
| Ti | 0.30561100  | 0.65835300  | 0.69711600  |
| N  | 2.10655500  | -0.43427400 | 0.19680700  |
| N  | -0.33239000 | -0.48934800 | -0.63546700 |
| C  | 1.94711800  | -1.28079100 | -0.86134900 |
| C  | 3.01619600  | -2.05355500 | -1.34816700 |
| H  | 2.85707100  | -2.72955000 | -2.20254500 |
| C  | 4.26855900  | -1.96215600 | -0.72486200 |
| H  | 5.11603700  | -2.56605800 | -1.08497600 |
| C  | 4.42429500  | -1.09225800 | 0.37252600  |
| H  | 5.38804100  | -0.99226300 | 0.89380500  |
| C  | 3.32487600  | -0.34548300 | 0.79928500  |
| H  | 3.41406800  | 0.35309000  | 1.64776800  |
| C  | 0.55067200  | -1.34090500 | -1.43062300 |
| H  | 0.17832500  | -2.39109500 | -1.43319700 |
| C  | -1.75095500 | -0.69780300 | -0.61017300 |
| C  | -2.29230300 | -1.76280700 | 0.19623200  |
| C  | -3.69058400 | -1.86787600 | 0.30337800  |
| H  | -4.12197600 | -2.66541900 | 0.92927700  |
| C  | -4.54280000 | -0.99065300 | -0.38915800 |
| H  | -5.63446800 | -1.08720800 | -0.28148800 |
| C  | -4.00720700 | -0.02675400 | -1.25816000 |
| H  | -4.68430200 | 0.60158300  | -1.85886000 |
| C  | -2.61584000 | 0.12415400  | -1.41209500 |
| C  | -1.42741700 | -2.81467800 | 0.85257500  |
| H  | -0.37221500 | -2.50724500 | 0.97489300  |
| C  | -2.10187100 | 1.04174100  | -2.49611800 |
| H  | -0.99742700 | 1.06964300  | -2.54479800 |
| H  | -1.82645400 | -3.11331200 | 1.84350200  |
| H  | -1.43118700 | -3.74079200 | 0.23594100  |
| H  | -2.48882000 | 2.07730700  | -2.39294600 |
| H  | -2.45989700 | 0.68328700  | -3.48492400 |
| C  | 2.01260200  | 2.38648100  | -0.74019000 |
| H  | 0.54538500  | -1.02152700 | -2.50126700 |
| H  | 3.05381000  | 2.41082200  | -0.36900700 |
| C  | 1.04563300  | 2.78867700  | 0.16429300  |
| C  | -0.40839600 | 2.80683100  | -0.04269500 |
| C  | -0.77606000 | 1.41698000  | 2.51335900  |
| H  | -0.01504100 | 2.01556200  | 3.05644400  |
| C  | -1.61716100 | 2.12186000  | 1.60514700  |
| H  | -2.42870000 | 1.58397100  | 1.08146400  |
| C  | -0.68300500 | -0.00607800 | 2.64731200  |
| H  | -1.56070300 | -0.63036500 | 2.40421900  |
| C  | 0.56960300  | -0.59072200 | 2.78672000  |
| H  | 1.42887700  | 0.02002700  | 3.12930700  |
| H  | 0.70877600  | -1.68123900 | 2.82276000  |
| H  | -1.85353800 | 3.16655500  | 1.84700300  |

|   |             |            |             |
|---|-------------|------------|-------------|
| H | 1.41548100  | 3.18419100 | 1.13235900  |
| H | -0.86304700 | 3.76473400 | 0.24858600  |
| C | 1.86435400  | 2.08213700 | -2.18801600 |
| H | 2.39870300  | 2.88156500 | -2.75370700 |
| H | 2.38968600  | 1.14327800 | -2.46539600 |
| H | 0.81988500  | 2.05618300 | -2.54867900 |
| H | -0.78082300 | 2.47817700 | -1.02680600 |

#### 1Ti anti-P/trans-S

E: -1021.79381949 A.U.

|    |             |             |             |
|----|-------------|-------------|-------------|
| Ti | 0.21482800  | 0.55594300  | 0.69315500  |
| N  | 2.06626400  | -0.37886100 | -0.04771200 |
| N  | -0.37327500 | -0.46698400 | -0.74127200 |
| C  | 1.88550700  | -1.16097700 | -1.15057100 |
| C  | 2.95482800  | -1.85494600 | -1.74580700 |
| H  | 2.77429600  | -2.47537900 | -2.63715000 |
| C  | 4.23507600  | -1.75109300 | -1.18668500 |
| H  | 5.08527100  | -2.28928400 | -1.63402500 |
| C  | 4.41626900  | -0.94869900 | -0.04250700 |
| H  | 5.40362400  | -0.83896900 | 0.43047400  |
| C  | 3.31422500  | -0.27791800 | 0.49025600  |
| H  | 3.42399000  | 0.36878300  | 1.37572500  |
| C  | 0.46579300  | -1.23306900 | -1.65245600 |
| H  | 0.12014000  | -2.29192300 | -1.70943000 |
| C  | -1.80505000 | -0.53927700 | -0.73427700 |
| C  | -2.44872300 | -1.58982900 | 0.01342200  |
| C  | -3.85238600 | -1.59081700 | 0.08532900  |
| H  | -4.36144100 | -2.38075900 | 0.66056700  |
| C  | -4.61498300 | -0.62091600 | -0.58866300 |
| H  | -5.71348400 | -0.63797000 | -0.51253200 |
| C  | -3.98521800 | 0.33775600  | -1.39687900 |
| H  | -4.59573300 | 1.04943800  | -1.97531800 |
| C  | -2.58311400 | 0.38744200  | -1.51201200 |
| C  | -1.68345800 | -2.73997000 | 0.62845500  |
| H  | -0.59323100 | -2.55654200 | 0.69312500  |
| C  | -1.96738600 | 1.32584400  | -2.51970700 |
| H  | -0.86203100 | 1.29992800  | -2.51364500 |
| H  | -2.06278300 | -3.00187100 | 1.63843600  |
| H  | -1.82015600 | -3.65489700 | 0.01120500  |
| H  | -2.30383300 | 2.37425500  | -2.37492600 |
| H  | -2.29648500 | 1.04170200  | -3.54246700 |
| C  | 1.93091200  | 2.54480000  | -0.28158200 |
| H  | 0.39003400  | -0.83719000 | -2.69425300 |
| H  | 2.94670600  | 2.57502900  | 0.15236700  |
| C  | 0.88460000  | 2.79036400  | 0.59958900  |
| C  | -0.51834800 | 2.62047800  | 0.32925300  |
| C  | -0.99062200 | 0.09856800  | 2.67876800  |
| H  | -1.57728000 | -0.79454100 | 2.40135900  |
| C  | -1.58396600 | 1.33770100  | 2.63202000  |
| H  | -1.08349100 | 2.22896700  | 3.04512000  |
| C  | 0.40807500  | -0.08762900 | 3.06229500  |
| H  | 0.93143200  | 0.78013300  | 3.51219300  |
| C  | 1.10105600  | -1.24613800 | 2.84501100  |
| H  | 2.16442100  | -1.33530700 | 3.11716900  |
| H  | 0.60718600  | -2.15219500 | 2.45580900  |
| H  | -2.63013200 | 1.45216000  | 2.30685800  |
| H  | 1.17347900  | 3.03735600  | 1.64188900  |
| H  | -1.23240800 | 3.16203100  | 0.96597600  |
| C  | 1.88073600  | 2.46265600  | -1.76900300 |
| H  | 2.36394800  | 3.38413000  | -2.17114100 |
| H  | 2.49265700  | 1.62299300  | -2.16068400 |



|   |             |            |             |
|---|-------------|------------|-------------|
| H | 0.86027300  | 2.41485000 | -2.19144200 |
| H | -0.84504300 | 2.55925700 | -0.72327400 |

**TS<sub>1-2Ti</sub> anti-P/trans-S**

E: -1021.78733368 A.U.

|    |             |             |             |
|----|-------------|-------------|-------------|
| Ti | 0.27542900  | 0.72155100  | 0.55339100  |
| N  | 2.07978600  | -0.43587200 | 0.11032000  |
| N  | -0.37342100 | -0.59571600 | -0.59580100 |
| C  | 1.88395200  | -1.41841400 | -0.81556900 |
| C  | 2.93872700  | -2.24477400 | -1.24328500 |
| H  | 2.74867200  | -3.03154400 | -1.98959400 |
| C  | 4.21770200  | -2.05869400 | -0.70158500 |
| H  | 5.05578300  | -2.69922000 | -1.01780600 |
| C  | 4.41358700  | -1.04413900 | 0.25649100  |
| H  | 5.40037600  | -0.86541500 | 0.70907900  |
| C  | 3.32469100  | -0.25611600 | 0.63312200  |
| H  | 3.44007900  | 0.54917900  | 1.37683900  |
| C  | 0.46519100  | -1.55486400 | -1.30927000 |
| H  | 0.09165800  | -2.59282000 | -1.14827500 |
| C  | -1.80180600 | -0.74645200 | -0.52596200 |
| C  | -2.36268800 | -1.67353800 | 0.42185100  |
| C  | -3.76162100 | -1.74968900 | 0.52835000  |
| H  | -4.20772000 | -2.44629700 | 1.25619600  |
| C  | -4.59881300 | -0.96877400 | -0.28860600 |
| H  | -5.69230500 | -1.04151100 | -0.18112200 |
| C  | -4.04560900 | -0.12927000 | -1.26541100 |
| H  | -4.70926800 | 0.43108300  | -1.94322400 |
| C  | -2.65019900 | -0.01225500 | -1.42259400 |
| C  | -1.51742200 | -2.60545000 | 1.26083800  |
| H  | -0.43490100 | -2.37959400 | 1.21253700  |
| C  | -2.11963100 | 0.78595700  | -2.58862600 |
| H  | -1.01526200 | 0.79264300  | -2.63707700 |
| H  | -1.83122700 | -2.59855500 | 2.32596900  |
| H  | -1.64707500 | -3.65406500 | 0.91570300  |
| H  | -2.48799200 | 1.83413400  | -2.58145000 |
| H  | -2.48453200 | 0.34635300  | -3.54136100 |
| C  | 1.91935400  | 2.31399200  | -1.00478900 |
| H  | 0.40859600  | -1.38645800 | -2.41235400 |
| H  | 2.97779000  | 2.35220800  | -0.68835500 |
| C  | 1.00723000  | 2.82458600  | -0.09739800 |
| C  | -0.45156300 | 2.78977500  | -0.18196000 |
| C  | -1.03347900 | 0.99091000  | 2.27603200  |
| H  | -1.71516900 | 0.12482900  | 2.20430300  |
| C  | -1.41417600 | 2.24279900  | 1.72668000  |
| H  | -0.97593700 | 3.15488400  | 2.16336400  |
| C  | 0.25343000  | 0.83675400  | 2.93244700  |
| H  | 0.78618600  | 1.76042200  | 3.23698500  |
| C  | 0.91808100  | -0.36167200 | 3.01126200  |
| H  | 1.93624200  | -0.42221000 | 3.42611500  |
| H  | 0.41921000  | -1.31468100 | 2.76899600  |
| H  | -2.43221200 | 2.35502300  | 1.32247800  |
| H  | 1.43129600  | 3.28840800  | 0.81686800  |
| H  | -0.95544500 | 3.72509100  | 0.10416300  |
| C  | 1.70224300  | 1.90765100  | -2.42112800 |
| H  | 2.23801400  | 2.64823100  | -3.06040000 |
| H  | 2.18251200  | 0.93336600  | -2.65310200 |
| H  | 0.64446500  | 1.89766500  | -2.74045400 |
| H  | -0.89893100 | 2.37590900  | -1.10660500 |

**1Ti anti-S/trans-P**

E: -1021.80202653 A.U.

|    |             |             |             |
|----|-------------|-------------|-------------|
| Ti | 0.26511200  | 0.88506700  | 0.09029400  |
| N  | 2.12398800  | -0.36922800 | 0.03588600  |
| N  | -0.27680100 | -0.70851100 | -0.69753400 |
| C  | 1.98549200  | -1.49058100 | -0.72940000 |
| C  | 3.05670800  | -2.36951100 | -0.96222300 |
| H  | 2.90507600  | -3.26044900 | -1.59096600 |
| C  | 4.30285400  | -2.10145400 | -0.37926000 |
| H  | 5.15555200  | -2.77819700 | -0.54465500 |
| C  | 4.43894700  | -0.95821900 | 0.42971100  |
| H  | 5.39245600  | -0.71285500 | 0.92082100  |
| C  | 3.33416900  | -0.12128300 | 0.60766000  |
| H  | 3.41821200  | 0.77954200  | 1.23285300  |
| C  | 0.59816300  | -1.71796100 | -1.27554300 |
| H  | 0.23609200  | -2.74188000 | -1.03194700 |
| C  | -1.65491200 | -0.93145900 | -0.38985100 |
| C  | -1.98518600 | -1.68926100 | 0.79455900  |
| C  | -3.33929500 | -1.80591600 | 1.14839300  |
| H  | -3.61268700 | -2.36962400 | 2.05474500  |
| C  | -4.35337500 | -1.23976400 | 0.35010700  |
| H  | -5.40739900 | -1.33987000 | 0.65351100  |
| C  | -4.03008800 | -0.59859800 | -0.85375300 |
| H  | -4.83541400 | -0.22841400 | -1.50828000 |
| C  | -2.68985800 | -0.45697300 | -1.27058500 |
| C  | -0.94171800 | -2.43331200 | 1.59822800  |
| H  | 0.07238300  | -1.99277100 | 1.52922700  |
| C  | -2.41382600 | 0.05347500  | -2.66171400 |
| H  | -1.33654300 | 0.12769800  | -2.88981800 |
| H  | -1.22500100 | -2.50535300 | 2.66778700  |
| H  | -0.86518500 | -3.48270200 | 1.23605400  |
| H  | -2.89533700 | 1.03458100  | -2.85527300 |
| H  | -2.85823200 | -0.64931100 | -3.39925000 |
| C  | 1.61709200  | 1.95742900  | -1.39955800 |
| H  | 0.59669300  | -1.65405500 | -2.39105300 |
| H  | 2.37811000  | 1.41278300  | -1.97796000 |
| C  | 0.32384000  | 2.08831800  | -1.94377500 |
| C  | -0.71735000 | 2.64591900  | -1.19061700 |
| C  | -0.96382400 | 2.00765400  | 1.97792500  |
| H  | -0.45883400 | 2.98634800  | 2.08820500  |
| C  | -2.18719000 | 1.95072800  | 1.36219000  |
| H  | -2.75854900 | 1.00906200  | 1.29834000  |
| C  | -0.28337700 | 0.82693500  | 2.49341000  |
| H  | -0.86718600 | -0.10769700 | 2.54589800  |
| C  | 1.03449300  | 0.81769700  | 2.86560500  |
| H  | 1.61947600  | 1.75132600  | 2.94038000  |
| H  | 1.52335100  | -0.10751100 | 3.20871800  |
| H  | -2.67272000 | 2.86232900  | 0.98052900  |
| H  | 0.09760000  | 1.53086400  | -2.86714700 |
| H  | -0.49788400 | 3.45202300  | -0.46934400 |
| C  | 2.07859200  | 2.79466900  | -0.23482400 |
| H  | 1.71599600  | 2.44165200  | 0.78567200  |
| H  | 3.18020100  | 2.78589800  | -0.13891300 |
| H  | 1.72777400  | 3.84696600  | -0.29377700 |
| H  | -1.75287800 | 2.61111800  | -1.55942000 |

**TS<sub>1-2Ti</sub> anti-S/trans-P**

E: -1021.78063807 A.U.

|    |             |             |             |
|----|-------------|-------------|-------------|
| Ti | 0.34120300  | 0.81981300  | 0.22737800  |
| N  | 2.17773800  | -0.40207400 | 0.04499200  |
| N  | -0.27334000 | -0.77413200 | -0.53442700 |
| C  | 2.00056100  | -1.53396200 | -0.69680900 |

|   |             |             |             |
|---|-------------|-------------|-------------|
| C | 3.06802400  | -2.38988500 | -1.01685100 |
| H | 2.88165500  | -3.29082500 | -1.62155700 |
| C | 4.35320000  | -2.08957400 | -0.54681000 |
| H | 5.20364900  | -2.74868800 | -0.78063700 |
| C | 4.53043900  | -0.94043000 | 0.24592900  |
| H | 5.51505300  | -0.67359300 | 0.65799500  |
| C | 3.42595500  | -0.13027500 | 0.51884200  |
| H | 3.54094200  | 0.76413800  | 1.14836200  |
| C | 0.57736900  | -1.81412300 | -1.09760500 |
| H | 0.25996800  | -2.81770300 | -0.73082700 |
| C | -1.67557800 | -0.98195200 | -0.32653800 |
| C | -2.10155600 | -1.69471800 | 0.85237100  |
| C | -3.47995200 | -1.77390300 | 1.11653000  |
| H | -3.82491500 | -2.29790800 | 2.02222200  |
| C | -4.42296600 | -1.21993500 | 0.23202500  |
| H | -5.49741800 | -1.28699000 | 0.46406700  |
| C | -4.00216500 | -0.63461000 | -0.97271000 |
| H | -4.75326600 | -0.28520700 | -1.69943900 |
| C | -2.63497400 | -0.52706600 | -1.29507100 |
| C | -1.13255900 | -2.42476700 | 1.75494600  |
| H | -0.09294700 | -2.05159000 | 1.68141600  |
| C | -2.25174200 | -0.04782400 | -2.67596000 |
| H | -2.81770500 | -0.62666600 | -3.43530700 |
| H | -1.45133400 | -2.38670600 | 2.81655400  |
| H | -1.11189900 | -3.50423800 | 1.48560900  |
| H | -1.17792700 | -0.18426100 | -2.89952700 |
| H | -2.52489000 | 1.01511100  | -2.84958100 |
| C | 1.47136000  | 2.09145400  | -1.33553900 |
| H | 0.47276200  | -1.85686300 | -2.20891500 |
| H | 2.15247900  | 1.55406100  | -2.01366600 |
| C | 0.12032600  | 2.15319700  | -1.68096100 |
| C | -0.89847100 | 2.85477400  | -0.92767300 |
| C | -0.78926100 | 2.08522100  | 1.82389000  |
| H | -0.14935600 | 2.95624100  | 2.06980900  |
| C | -1.80564100 | 2.29978100  | 0.84623600  |
| H | -2.49645200 | 1.47179100  | 0.60277900  |
| C | -0.40879500 | 0.82836200  | 2.38480500  |
| H | -1.14452200 | 0.00572900  | 2.37469700  |
| C | 0.91816000  | 0.55932000  | 2.70518100  |
| H | 1.63506600  | 1.38135900  | 2.87585600  |
| H | 1.23017000  | -0.44020500 | 3.04292300  |
| H | -2.27793900 | 3.29340900  | 0.81414200  |
| H | -0.20100500 | 1.59048000  | -2.57030400 |
| H | -0.57187100 | 3.80909700  | -0.47946500 |
| C | 2.05905000  | 2.81389100  | -0.15728900 |
| H | 1.97394800  | 2.23869300  | 0.82273900  |
| H | 3.15186100  | 2.95327500  | -0.26747200 |
| H | 1.58359700  | 3.79670800  | 0.04056700  |
| H | -1.86965800 | 2.92103100  | -1.44492900 |

# 1Ti anti-S/trans-S

E: -1021.79992304 A.U.

|    |             |             |             |
|----|-------------|-------------|-------------|
| Ti | 0.33744600  | 0.85568100  | 0.06368600  |
| N  | 2.11988800  | -0.44691300 | -0.06415500 |
| N  | -0.38964800 | -0.80865600 | -0.37150000 |
| C  | 1.83585700  | -1.70830400 | -0.50025300 |
| C  | 2.84079600  | -2.67673900 | -0.66964600 |
| H  | 2.57287300  | -3.68318800 | -1.02657700 |
| C  | 4.16995000  | -2.34622600 | -0.37514100 |
| H  | 4.97232100  | -3.08995000 | -0.50002400 |
| C  | 4.45878000  | -1.04894700 | 0.08961500  |

|   |             |             |             |
|---|-------------|-------------|-------------|
| H | 5.48558400  | -0.74571700 | 0.34318600  |
| C | 3.41335900  | -0.13379100 | 0.22829200  |
| H | 3.61152300  | 0.88608000  | 0.59045300  |
| C | 0.37910600  | -1.98289700 | -0.76236400 |
| H | 0.03472400  | -2.87893600 | -0.19492000 |
| C | -1.81979900 | -0.86855600 | -0.21665900 |
| C | -2.36293300 | -1.30062800 | 1.04521400  |
| C | -3.75607000 | -1.24897800 | 1.22404800  |
| H | -4.18582000 | -1.56561500 | 2.18804100  |
| C | -4.60814600 | -0.83582300 | 0.18514600  |
| H | -5.69616700 | -0.79588400 | 0.34986800  |
| C | -4.07873800 | -0.53615000 | -1.07802500 |
| H | -4.75902300 | -0.30022300 | -1.91214600 |
| C | -2.69089700 | -0.57194200 | -1.32021900 |
| C | -1.51246800 | -1.90793200 | 2.13998700  |
| H | -0.42583100 | -1.77517900 | 1.97683400  |
| C | -2.21095100 | -0.41753600 | -2.74484600 |
| H | -1.13746500 | -0.64776800 | -2.87061000 |
| H | -1.77443500 | -1.51231300 | 3.14393700  |
| H | -1.69923500 | -3.00272700 | 2.19292800  |
| H | -2.41019900 | 0.59641000  | -3.15307900 |
| H | -2.77214900 | -1.11816200 | -3.39764800 |
| C | 1.52024000  | 1.79183700  | -1.69763600 |
| H | 0.21029300  | -2.23112900 | -1.83839900 |
| H | 2.21645900  | 1.17566600  | -2.28671200 |
| C | 0.16614500  | 1.81836000  | -2.06148500 |
| C | -0.78043300 | 2.52949400  | -1.29534200 |
| C | -0.73000100 | 1.52044900  | 2.04620500  |
| H | -1.29310700 | 0.59524300  | 2.25448300  |
| C | -1.35974500 | 2.55487700  | 1.38973600  |
| H | -0.89850700 | 3.55330900  | 1.32004500  |
| C | 0.65939800  | 1.59338600  | 2.48904400  |
| H | 1.13984400  | 2.58949600  | 2.51887000  |
| C | 1.38636800  | 0.49193300  | 2.84633000  |
| H | 2.44213400  | 0.57821300  | 3.14890200  |
| H | 0.92838300  | -0.50882300 | 2.90527800  |
| H | -2.40951400 | 2.46430900  | 1.07209200  |
| H | -0.17322000 | 1.10757600  | -2.82907200 |
| H | -0.48759500 | 3.49730400  | -0.85892500 |
| C | 2.09631300  | 2.79786500  | -0.73315200 |
| H | 1.70525000  | 2.71644100  | 0.32660200  |
| H | 3.19642800  | 2.72545100  | -0.65898000 |
| H | 1.82796000  | 3.83910400  | -1.01974100 |
| H | -1.85377900 | 2.41251800  | -1.50930000 |

# TS1-2Ti anti-S/trans-S

E: -1021.79118023 A.U.

|    |             |             |             |
|----|-------------|-------------|-------------|
| Ti | 0.31611000  | 0.82042800  | 0.01146100  |
| N  | 2.17751900  | -0.39782900 | -0.00725800 |
| N  | -0.29018600 | -0.94378200 | -0.03943700 |
| C  | 1.96213100  | -1.74043100 | -0.12721100 |
| C  | 3.02112800  | -2.66261600 | -0.18916100 |
| H  | 2.80232600  | -3.73695300 | -0.28809700 |
| C  | 4.34058000  | -2.19806400 | -0.11965900 |
| H  | 5.18582300  | -2.90216500 | -0.16747000 |
| C  | 4.56368800  | -0.81566100 | 0.02462700  |
| H  | 5.58095700  | -0.40319600 | 0.09930500  |
| C  | 3.46486200  | 0.04372000  | 0.07997900  |
| H  | 3.61642500  | 1.12461400  | 0.21231300  |
| C  | 0.51634000  | -2.14678400 | -0.16564100 |
| H  | 0.28452400  | -2.86533500 | 0.65675400  |

|   |             |             |             |
|---|-------------|-------------|-------------|
| C | -1.72260300 | -0.99648800 | -0.02076400 |
| C | -2.41565200 | -1.11599100 | 1.23564200  |
| C | -3.82125400 | -1.06844600 | 1.22596300  |
| H | -4.36820600 | -1.14303400 | 2.17956900  |
| C | -4.53692800 | -0.96702100 | 0.02070300  |
| H | -5.63730900 | -0.92648200 | 0.03851400  |
| C | -3.85721900 | -0.97718100 | -1.20810300 |
| H | -4.43159800 | -0.98411000 | -2.14836000 |
| C | -2.45182900 | -1.02303400 | -1.26335200 |
| C | -1.70161700 | -1.39962400 | 2.53801700  |
| H | -0.60119100 | -1.30626800 | 2.46404100  |
| C | -1.78174300 | -1.25074800 | -2.59927500 |
| H | -0.69210400 | -1.06117000 | -2.59179500 |
| H | -2.06292600 | -0.75349800 | 3.36594700  |
| H | -1.91779400 | -2.44206700 | 2.85883000  |
| H | -2.24725100 | -0.64857500 | -3.40689900 |
| H | -1.92412600 | -2.31209400 | -2.90195500 |
| C | 0.84211600  | 1.45259800  | -2.07998200 |
| H | 0.28005200  | -2.69018900 | -1.11150300 |
| H | 1.14995500  | 0.64746100  | -2.76568100 |
| C | -0.52116900 | 1.76088000  | -1.96059100 |
| C | -1.00911700 | 2.81150200  | -1.12335700 |
| C | -0.65752200 | 1.74249400  | 1.75802700  |
| H | -1.08908500 | 0.84300600  | 2.22452800  |
| C | -1.48530500 | 2.59016400  | 0.97624400  |
| H | -1.30641300 | 3.67630500  | 1.01037400  |
| C | 0.71035000  | 2.10083800  | 2.09256800  |
| H | 1.05293100  | 3.13036700  | 1.87197100  |
| C | 1.61276800  | 1.19307800  | 2.58245200  |
| H | 2.66145500  | 1.47255600  | 2.77042100  |
| H | 1.30753600  | 0.17460900  | 2.87740000  |
| H | -2.53634800 | 2.28915500  | 0.84958300  |
| H | -1.25432600 | 1.10632400  | -2.45603300 |
| H | -0.34249800 | 3.67488700  | -0.96169700 |
| C | 1.89926800  | 2.38636700  | -1.54553800 |
| H | 1.90774600  | 2.48812700  | -0.41604400 |
| H | 2.91585800  | 2.06321900  | -1.83164000 |
| H | 1.74080600  | 3.43118700  | -1.89305700 |
| H | -2.06862600 | 3.07786900  | -1.25415400 |

#### 2Ti anti-P/trans-P

E: -1021.81173966 A.U.

|    |             |             |             |
|----|-------------|-------------|-------------|
| Ti | 0.09799600  | -0.38192100 | -0.14032900 |
| N  | 1.38721100  | 1.33628700  | -0.34278900 |
| N  | -0.74759500 | 0.99205300  | 0.87202700  |
| C  | 1.06965300  | 2.43223100  | 0.41453900  |
| C  | 1.86942200  | 3.58556300  | 0.40818200  |
| H  | 1.59428100  | 4.44645700  | 1.03666900  |
| C  | 2.99978200  | 3.63025000  | -0.42169600 |
| H  | 3.63262900  | 4.53111600  | -0.45206900 |
| C  | 3.30729000  | 2.51403500  | -1.22316200 |
| H  | 4.17576400  | 2.51342700  | -1.89853100 |
| C  | 2.48618600  | 1.38733200  | -1.14830100 |
| H  | 2.70156800  | 0.49636600  | -1.75922700 |
| C  | -0.20532100 | 2.29058500  | 1.21127600  |
| H  | -0.90101900 | 3.12679100  | 0.99484800  |
| C  | -2.03946800 | 0.55997100  | 0.59425700  |
| C  | -3.10627500 | 1.32725200  | -0.00366300 |
| C  | -4.22016100 | 0.61349800  | -0.46465500 |
| H  | -5.05112100 | 1.17879800  | -0.91679000 |
| C  | -4.31471600 | -0.79987200 | -0.39957300 |

|   |             |             |             |
|---|-------------|-------------|-------------|
| H | -5.21427700 | -1.30269400 | -0.78656600 |
| C | -3.29587900 | -1.54156100 | 0.19017100  |
| H | -3.39646300 | -2.63265900 | 0.30174200  |
| C | -2.16501200 | -0.88013700 | 0.74322100  |
| C | -3.05956300 | 2.82715100  | -0.16423600 |
| H | -2.19497600 | 3.15442700  | -0.78049300 |
| C | -1.22199600 | -1.64789900 | 1.63488700  |
| H | -0.17624500 | -1.86855000 | 1.22169200  |
| H | -3.97373700 | 3.18855100  | -0.67187700 |
| H | -3.00783200 | 3.35268200  | 0.81302000  |
| H | -1.60100500 | -2.67260900 | 1.81684400  |
| H | -1.04456200 | -1.14345600 | 2.60362700  |
| C | 2.24616400  | -1.17624300 | 1.63749300  |
| H | 0.00957800  | 2.34564700  | 2.30535600  |
| H | 2.62500500  | -0.13881500 | 1.69267100  |
| C | 2.37675500  | -1.81314700 | 0.42327500  |
| C | 2.09688000  | -3.27327200 | 0.11996600  |
| C | 1.04496700  | -2.22302200 | -1.88465100 |
| H | 1.73719300  | -1.46636700 | -2.30403200 |
| C | 1.68070800  | -3.48597600 | -1.36668000 |
| H | 0.99134000  | -4.35012600 | -1.45163200 |
| C | -0.30059100 | -1.90988500 | -1.93302500 |
| H | -1.04316000 | -2.68015800 | -1.64938300 |
| C | -0.73990900 | -0.54019600 | -2.08819500 |
| H | -0.06442200 | 0.13879200  | -2.65491600 |
| H | -1.81210400 | -0.32178200 | -2.22493800 |
| H | 2.57007600  | -3.72525900 | -1.98572100 |
| H | 2.94908600  | -1.25937500 | -0.34184900 |
| H | 2.99899600  | -3.87586500 | 0.37246000  |
| C | 1.85410700  | -1.78559300 | 2.94648900  |
| H | 2.79048900  | -1.93568700 | 3.53359700  |
| H | 1.23055500  | -1.10767000 | 3.56407500  |
| H | 1.36888500  | -2.77712900 | 2.86399100  |
| H | 1.29412200  | -3.65734000 | 0.78448500  |

#### 2Ti anti-P/trans-S

E: -1021.81958009 A.U.

|    |             |             |             |
|----|-------------|-------------|-------------|
| Ti | -0.07483800 | 0.38903600  | -0.13025500 |
| N  | -1.55173800 | -1.15750200 | -0.31755800 |
| N  | 0.61773300  | -1.08261900 | 0.87963400  |
| C  | -1.36179100 | -2.29170000 | 0.42489800  |
| C  | -2.30662900 | -3.32958300 | 0.43248000  |
| H  | -2.13257800 | -4.22383100 | 1.05040000  |
| C  | -3.45204900 | -3.21879300 | -0.36986000 |
| H  | -4.19924600 | -4.02765500 | -0.38782600 |
| C  | -3.62681000 | -2.06661400 | -1.16115500 |
| H  | -4.50186700 | -1.94766700 | -1.81723200 |
| C  | -2.66264500 | -1.05871800 | -1.10163500 |
| H  | -2.76694600 | -0.14424400 | -1.70670500 |
| C  | -0.05788800 | -2.32639800 | 1.18209500  |
| H  | 0.53221000  | -3.22318500 | 0.90203000  |
| C  | 1.94890800  | -0.78388800 | 0.62531600  |
| C  | 2.94346700  | -1.64672300 | 0.03056100  |
| C  | 4.11987900  | -1.03864000 | -0.42375000 |
| H  | 4.89478300  | -1.67756200 | -0.87733100 |
| C  | 4.35150200  | 0.35921900  | -0.34649100 |
| H  | 5.29652300  | 0.77504100  | -0.72829200 |
| C  | 3.41133100  | 1.19027800  | 0.25230300  |
| H  | 3.62080100  | 2.26386900  | 0.38143300  |
| C  | 2.21520500  | 0.63697300  | 0.79103500  |
| C  | 2.76264500  | -3.13715200 | -0.12748000 |

|   |             |             |             |
|---|-------------|-------------|-------------|
| H | 1.89103300  | -3.38923400 | -0.76889500 |
| C | 1.34878800  | 1.47953100  | 1.69617700  |
| H | 0.35332400  | 1.83937400  | 1.26165100  |
| H | 3.65443300  | -3.58339200 | -0.60678000 |
| H | 2.63431400  | -3.64922900 | 0.84960300  |
| H | 1.84532900  | 2.44365400  | 1.92198700  |
| H | 1.09059000  | 0.96686000  | 2.64208800  |
| C | -2.20127500 | 1.49004600  | 1.47746100  |
| H | -0.24048800 | -2.41057100 | 2.28016500  |
| H | -2.74318100 | 0.52653900  | 1.44567100  |
| C | -2.03026000 | 2.14655800  | 0.28078300  |
| C | -1.50565200 | 3.55051300  | 0.05649200  |
| C | 0.10977400  | 2.53102300  | -1.54021200 |
| H | 1.11142100  | 2.61304300  | -1.06375500 |
| C | -0.85065900 | 3.67499600  | -1.34244300 |
| H | -1.63395700 | 3.64009700  | -2.12927900 |
| C | -0.15579500 | 1.41279100  | -2.31366200 |
| H | -1.10638000 | 1.39395800  | -2.88106500 |
| C | 0.57432400  | 0.17991500  | -2.15870700 |
| H | 0.28505900  | -0.69312600 | -2.76718900 |
| H | 1.66797100  | 0.25386200  | -1.97554900 |
| H | -0.34070000 | 4.65538800  | -1.43983500 |
| H | -2.52613500 | 1.69254700  | -0.59976900 |
| H | -2.35317100 | 4.26832200  | 0.14905400  |
| C | -1.88104900 | 1.99993600  | 2.84566700  |
| H | -2.84381200 | 2.26962000  | 3.33950800  |
| H | -1.43346100 | 1.21659400  | 3.49142600  |
| H | -1.24772300 | 2.90753500  | 2.85818300  |
| H | -0.78359700 | 3.84402300  | 0.84814200  |

#### 2Ti anti-S/trans-P

E: -1021.82165193

|    |             |             |             |
|----|-------------|-------------|-------------|
| Ti | 0.37540800  | 0.64229400  | 0.22011600  |
| N  | 2.40955700  | 0.02674100  | 0.03780500  |
| N  | 0.19746700  | -1.18727800 | 0.10579000  |
| C  | 2.57929300  | -1.33252800 | -0.00986400 |
| C  | 3.85599100  | -1.90064100 | -0.12860000 |
| H  | 3.96770100  | -2.99530600 | -0.16195900 |
| C  | 4.97791900  | -1.05952000 | -0.20104600 |
| H  | 5.98802800  | -1.48856500 | -0.29421800 |
| C  | 4.79853600  | 0.33634900  | -0.14541500 |
| H  | 5.65302500  | 1.02770400  | -0.19193500 |
| C  | 3.50320100  | 0.84001100  | -0.01662400 |
| H  | 3.32525200  | 1.92618800  | 0.05415300  |
| C  | 1.30337100  | -2.13553900 | 0.08335900  |
| H  | 1.30486500  | -2.77196500 | 1.00107300  |
| C  | -1.18162200 | -1.50713900 | -0.07903700 |
| C  | -2.01904000 | -1.73845500 | 1.07026300  |
| C  | -3.39524700 | -1.94566200 | 0.85071300  |
| H  | -4.05700500 | -2.11275800 | 1.71556600  |
| C  | -3.92514200 | -1.98608600 | -0.44792400 |
| H  | -5.00348000 | -2.15634100 | -0.59385400 |
| C  | -3.08217300 | -1.85504800 | -1.56762800 |
| H  | -3.50503100 | -1.94817900 | -2.58083800 |
| C  | -1.70261500 | -1.63186100 | -1.41739700 |
| C  | -1.46231800 | -1.90759600 | 2.46318100  |
| H  | -0.42405900 | -1.54424700 | 2.57447900  |
| C  | -0.81662400 | -1.62563900 | -2.64242100 |
| H  | 0.19306600  | -1.20640400 | -2.46254700 |
| H  | -2.10107200 | -1.41848600 | 3.22703300  |
| H  | -1.45922400 | -2.98912000 | 2.72397100  |

|   |             |             |             |
|---|-------------|-------------|-------------|
| H | -1.28317400 | -1.07472200 | -3.48411100 |
| H | -0.67068900 | -2.66698900 | -3.00543900 |
| C | -0.38888800 | 1.86397100  | -1.76436600 |
| H | 1.20598400  | -2.83827200 | -0.77678100 |
| H | -0.13133000 | 0.95642500  | -2.34942300 |
| C | -1.66552400 | 1.90894300  | -1.24852700 |
| C | -2.34181100 | 3.05428100  | -0.54277800 |
| C | -0.96328400 | 2.38362700  | 1.38189100  |
| H | -0.18142200 | 3.09487100  | 1.02738900  |
| C | -2.36509000 | 2.74801700  | 0.97612500  |
| H | -3.07059200 | 1.92463400  | 1.21384200  |
| C | -0.53577600 | 1.39411600  | 2.25576500  |
| H | -1.28432000 | 0.72354700  | 2.71356300  |
| C | 0.85348400  | 1.05085000  | 2.29832300  |
| H | 1.58154600  | 1.88166900  | 2.17239500  |
| H | 1.21234700  | 0.23833200  | 2.94987400  |
| H | -2.71498700 | 3.64134800  | 1.54192000  |
| H | -2.27333100 | 0.98925000  | -1.35138300 |
| H | -1.81713400 | 4.01358100  | -0.72866500 |
| C | 0.59956400  | 2.99935700  | -1.85267900 |
| H | 1.61989700  | 2.71412200  | -1.50320900 |
| H | 0.75088500  | 3.26884000  | -2.92249800 |
| H | 0.28393500  | 3.91268400  | -1.31442100 |
| H | -3.37506800 | 3.16858400  | -0.93357900 |

#### 2Ti anti-S/trans-S

E: -1021.82535115 A.U.

|    |             |             |             |
|----|-------------|-------------|-------------|
| Ti | -0.26903800 | 0.64759700  | -0.08893200 |
| N  | -2.36022500 | 0.06636300  | 0.03039000  |
| N  | -0.21622300 | -1.12805300 | -0.57380400 |
| C  | -2.60027500 | -1.21244800 | -0.39736800 |
| C  | -3.89830800 | -1.74385600 | -0.43194100 |
| H  | -4.05925200 | -2.77247800 | -0.78976800 |
| C  | -4.97511700 | -0.95444600 | -0.00053900 |
| H  | -6.00077000 | -1.35510700 | -0.01638400 |
| C  | -4.72529800 | 0.35513900  | 0.45022000  |
| H  | -5.53955100 | 1.00833300  | 0.79754300  |
| C  | -3.41247000 | 0.83082100  | 0.43893500  |
| H  | -3.18990700 | 1.86052400  | 0.76051700  |
| C  | -1.36781800 | -1.99090400 | -0.80162100 |
| H  | -1.43114700 | -2.30038300 | -1.87233400 |
| C  | 1.05966100  | -1.51702300 | -0.07230600 |
| C  | 2.16106700  | -1.69410200 | -0.98408400 |
| C  | 3.42255100  | -2.00156600 | -0.44037600 |
| H  | 4.27993500  | -2.14199000 | -1.11791500 |
| C  | 3.59583100  | -2.17084700 | 0.94352700  |
| H  | 4.59243800  | -2.41788900 | 1.34240200  |
| C  | 2.50247800  | -2.06320600 | 1.82311900  |
| H  | 2.64994100  | -2.24030500 | 2.90046800  |
| C  | 1.21631900  | -1.76101400 | 1.34311100  |
| C  | 1.96995900  | -1.68320300 | -2.47912100 |
| H  | 0.99777400  | -1.25677200 | -2.79200200 |
| C  | 0.03888200  | -1.77541100 | 2.29219300  |
| H  | -0.79866200 | -1.10512400 | 1.99635900  |
| H  | 2.78966700  | -1.14544100 | -2.99788900 |
| H  | 2.00174900  | -2.72736600 | -2.86220700 |
| H  | 0.34352900  | -1.50918700 | 3.32348900  |
| H  | -0.39805700 | -2.79723900 | 2.35066700  |
| C  | 0.60657700  | 1.80498600  | 1.82282200  |
| H  | -1.27954000 | -2.93281200 | -0.21370100 |
| H  | 0.35291700  | 0.97646000  | 2.51655900  |

|   |             |            |             |
|---|-------------|------------|-------------|
| C | 1.86973800  | 1.77685900 | 1.27860900  |
| C | 2.52076400  | 2.79991200 | 0.39621700  |
| C | 1.41903700  | 1.65309100 | -1.58814000 |
| H | 1.49138000  | 0.75927700 | -2.23394600 |
| C | 2.71559700  | 2.18767300 | -1.01270800 |
| H | 3.15507600  | 2.94634000 | -1.70023600 |
| C | 0.20881100  | 2.35149400 | -1.60624000 |
| H | 0.16553700  | 3.34997600 | -1.13060400 |
| C | -1.02642600 | 1.71070300 | -1.89194800 |
| H | -1.96285300 | 2.28827200 | -1.83187000 |
| H | -1.04998300 | 0.85983100 | -2.60006700 |
| H | 3.45566000  | 1.36287700 | -0.96104300 |
| H | 2.48117600  | 0.87988300 | 1.49571600  |
| H | 1.93830600  | 3.74184000 | 0.35041700  |
| C | -0.38539200 | 2.94060900 | 1.75028500  |
| H | -1.27856900 | 2.71648400 | 1.10726500  |
| H | -0.81436500 | 3.13549300 | 2.75557300  |
| H | 0.05098700  | 3.88046100 | 1.36298300  |
| H | 3.51354800  | 3.06117000 | 0.82452700  |

|   |             |             |             |
|---|-------------|-------------|-------------|
| C | 1.01758500  | 2.78765200  | -0.40564000 |
| C | -0.40508000 | 2.64937700  | -0.52244200 |
| C | -1.10922400 | 1.57526000  | 2.41010100  |
| H | -0.49865100 | 2.46382500  | 2.66637000  |
| C | -2.32696600 | 1.74553800  | 1.80795400  |
| H | -2.97823800 | 0.88506900  | 1.57345000  |
| C | -0.56328900 | 0.25938500  | 2.71941000  |
| H | -1.25905900 | -0.59627000 | 2.72199200  |
| C | 0.77662500  | 0.04395200  | 2.90222000  |
| H | 1.47865000  | 0.89624700  | 2.99335300  |
| H | 1.18543700  | -0.95948600 | 3.09583600  |
| H | -2.71660900 | 2.75023900  | 1.57919000  |
| H | 1.42796600  | 3.39719100  | 0.42656400  |
| H | -1.02482000 | 3.36375000  | 0.03700100  |
| C | 3.40143400  | 2.26290700  | -1.15925100 |
| H | 3.93591700  | 1.30157000  | -1.30572300 |
| H | 3.71209200  | 2.90067800  | -2.02080300 |
| H | 3.75782000  | 2.75961300  | -0.23568400 |
| H | -0.81335900 | 2.37191400  | -1.50798100 |

#### Titanium – Path 4

##### 1<sub>Ti</sub> syn-p/trans-P

E: -1021.79550893 A.U.

|    |             |             |             |
|----|-------------|-------------|-------------|
| Ti | 0.20036600  | 0.74345800  | 0.42715500  |
| N  | 2.02964300  | -0.44708300 | 0.13245200  |
| N  | -0.34080200 | -0.58138600 | -0.75200400 |
| C  | 1.88673800  | -1.46662700 | -0.76518400 |
| C  | 2.93905800  | -2.35247400 | -1.05017700 |
| H  | 2.79000100  | -3.15807300 | -1.78571100 |
| C  | 4.16137200  | -2.20630100 | -0.37844600 |
| H  | 4.99420100  | -2.89876400 | -0.57669400 |
| C  | 4.30360100  | -1.16027400 | 0.55208100  |
| H  | 5.24329700  | -1.00553400 | 1.10307800  |
| C  | 3.22502100  | -0.29787800 | 0.76711700  |
| H  | 3.31782200  | 0.54728900  | 1.46767000  |
| C  | 0.51897800  | -1.56831600 | -1.39273100 |
| H  | 0.10394500  | -2.59419700 | -1.26897600 |
| C  | -1.76142600 | -0.69606600 | -0.65122400 |
| C  | -2.32320300 | -1.60291100 | 0.32192200  |
| C  | -3.72064800 | -1.62599000 | 0.47321600  |
| H  | -4.17118900 | -2.30469700 | 1.21513500  |
| C  | -4.55380200 | -0.82290900 | -0.32946700 |
| H  | -5.64557300 | -0.85661300 | -0.18786100 |
| C  | -4.00563200 | -0.02246900 | -1.34233500 |
| H  | -4.67288300 | 0.54379800  | -2.01167700 |
| C  | -2.61294100 | 0.03578000  | -1.55232000 |
| C  | -1.48047800 | -2.59673900 | 1.08986300  |
| H  | -0.42498900 | -2.28625200 | 1.21811100  |
| C  | -2.08660300 | 0.74498300  | -2.77460300 |
| H  | -0.98275600 | 0.74050800  | -2.83910300 |
| H  | -1.91005600 | -2.81121000 | 2.08944300  |
| H  | -1.46995900 | -3.57175900 | 0.55353400  |
| H  | -2.44921800 | 1.79237800  | -2.84017000 |
| H  | -2.47159600 | 0.23573600  | -3.68461200 |
| C  | 1.92307900  | 2.11026700  | -1.21335700 |
| H  | 0.57117500  | -1.39571400 | -2.49519300 |
| H  | 1.51552400  | 1.55509200  | -2.08131300 |

##### TS<sub>1-2Ti</sub> syn-p/trans-P

E: -1021.78097993 A.U.

|    |             |             |             |
|----|-------------|-------------|-------------|
| Ti | 0.30550100  | 0.65889900  | 0.63326600  |
| N  | 2.06986800  | -0.48450300 | 0.13746900  |
| N  | -0.41206300 | -0.61491100 | -0.53512100 |
| C  | 1.83686400  | -1.48803800 | -0.75750000 |
| C  | 2.86452600  | -2.35276300 | -1.17067200 |
| H  | 2.64643400  | -3.15425900 | -1.89328300 |
| C  | 4.15295100  | -2.19102400 | -0.64063400 |
| H  | 4.96849200  | -2.86678300 | -0.94198200 |
| C  | 4.38572800  | -1.15613700 | 0.28547500  |
| H  | 5.37958900  | -0.99516900 | 0.72911700  |
| C  | 3.32330100  | -0.32271700 | 0.64337300  |
| H  | 3.47182000  | 0.50171900  | 1.36034700  |
| C  | 0.40847900  | -1.61025300 | -1.22464300 |
| H  | 0.02248500  | -2.63673500 | -1.02277400 |
| C  | -1.84431900 | -0.68709100 | -0.56470800 |
| C  | -2.53165200 | -1.54524900 | 0.36415100  |
| C  | -3.93792800 | -1.49350700 | 0.39676500  |
| H  | -4.48097700 | -2.12997600 | 1.11368000  |
| C  | -4.65719000 | -0.67083800 | -0.48542100 |
| H  | -5.75679100 | -0.64089900 | -0.43489600 |
| C  | -3.98057400 | 0.07113000  | -1.46807100 |
| H  | -4.55756100 | 0.64866200  | -2.20807900 |
| C  | -2.57611300 | 0.06168500  | -1.55000200 |
| C  | -1.82096100 | -2.57396800 | 1.21527500  |
| H  | -0.73085200 | -2.40763500 | 1.30072000  |
| C  | -1.91011800 | 0.72654700  | -2.73313600 |
| H  | -0.80638000 | 0.74573200  | -2.65881800 |
| H  | -2.25267100 | -2.63676300 | 2.23576500  |
| H  | -1.96387600 | -3.58318500 | 0.76964000  |
| H  | -2.27759800 | 1.76094800  | -2.89774900 |
| H  | -2.16039100 | 0.16710600  | -3.66074500 |
| C  | 1.68912900  | 2.12371600  | -1.23398800 |
| H  | 0.33754200  | -1.47921000 | -2.33154100 |
| H  | 1.16673900  | 1.58169700  | -2.04643800 |
| C  | 0.91374300  | 2.74241500  | -0.27046600 |
| C  | -0.55136600 | 2.70729700  | -0.24341700 |
| C  | -0.64213400 | 1.56555100  | 2.46676700  |
| H  | 0.15927400  | 2.20752200  | 2.89023800  |
| C  | -1.56614400 | 2.19259300  | 1.58506000  |

|   |             |             |             |
|---|-------------|-------------|-------------|
| H | -2.41873900 | 1.61318400  | 1.18564300  |
| C | -0.52517200 | 0.15765800  | 2.68930100  |
| H | -1.41148900 | -0.48416200 | 2.54602700  |
| C | 0.73771100  | -0.41687500 | 2.77598500  |
| H | 1.61420300  | 0.21087100  | 3.03137500  |
| H | 0.88084100  | -1.50464900 | 2.86163800  |
| H | -1.78113200 | 3.25585000  | 1.75495700  |
| H | 1.42800600  | 3.36529700  | 0.48937100  |
| H | -0.98739400 | 3.68644400  | -0.00115100 |
| C | 3.16040400  | 2.27919500  | -1.38085800 |
| H | 3.66186600  | 1.31585300  | -1.61003300 |
| H | 3.35053100  | 2.92286900  | -2.27210900 |
| H | 3.64208200  | 2.76340500  | -0.50920700 |
| H | -1.04470600 | 2.25640600  | -1.11981300 |

#### 1Ti syn-p/trans-S

E: -1021.79599647 A.U.

|    |             |             |             |
|----|-------------|-------------|-------------|
| Ti | 0.27055200  | 0.63692100  | 0.64622500  |
| N  | 2.03705900  | -0.43172300 | -0.06759300 |
| N  | -0.47972900 | -0.59300100 | -0.53554500 |
| C  | 1.75097700  | -1.41966600 | -0.96304200 |
| C  | 2.75562500  | -2.26142600 | -1.47131300 |
| H  | 2.49450800  | -3.04929600 | -2.19459200 |
| C  | 4.07849100  | -2.08810800 | -1.03980000 |
| H  | 4.87917000  | -2.74127800 | -1.42043700 |
| C  | 4.36678700  | -1.06778100 | -0.11262300 |
| H  | 5.39043200  | -0.89734500 | 0.25307200  |
| C  | 3.32335000  | -0.25788300 | 0.34202900  |
| H  | 3.51169900  | 0.55710000  | 1.06034400  |
| C  | 0.29562300  | -1.53771300 | -1.33717900 |
| H  | -0.07193400 | -2.57789700 | -1.17223100 |
| C  | -1.91676000 | -0.56367000 | -0.61228000 |
| C  | -2.68159500 | -1.42349100 | 0.24980100  |
| C  | -4.08429200 | -1.32606500 | 0.21088900  |
| H  | -4.68513000 | -1.97237900 | 0.87068200  |
| C  | -4.72815500 | -0.44510500 | -0.67285600 |
| H  | -5.82735100 | -0.38105800 | -0.68094300 |
| C  | -3.97550100 | 0.32012000  | -1.57669600 |
| H  | -4.49097500 | 0.96106700  | -2.30981400 |
| C  | -2.56876600 | 0.26677600  | -1.58564100 |
| C  | -2.05326600 | -2.49743200 | 1.10946100  |
| H  | -0.94994900 | -2.42805700 | 1.15886500  |
| C  | -1.82598200 | 1.01805600  | -2.66685600 |
| H  | -0.72804800 | 0.89273400  | -2.61458600 |
| H  | -2.45724600 | -2.49534400 | 2.14413800  |
| H  | -2.29717000 | -3.50029100 | 0.69652100  |
| H  | -2.05484200 | 2.10574300  | -2.65585500 |
| H  | -2.14897600 | 0.65491400  | -3.66564800 |
| C  | 1.52796000  | 2.25817900  | -1.06788600 |
| H  | 0.14769200  | -1.34111400 | -2.42668300 |
| H  | 0.93398900  | 1.78570000  | -1.87377900 |
| C  | 0.83183700  | 2.84270600  | -0.01723500 |
| C  | -0.57876100 | 2.69400900  | 0.19557700  |
| C  | -0.82252900 | 0.40434900  | 2.65151100  |
| H  | -1.48927500 | -0.45695700 | 2.47799200  |
| C  | -1.30796400 | 1.69228000  | 2.51727400  |
| H  | -0.73219800 | 2.55457400  | 2.89060600  |
| C  | 0.57228600  | 0.15134900  | 3.00064600  |
| H  | 1.16572800  | 1.00966500  | 3.37772100  |
| C  | 1.19327700  | -1.05336000 | 2.81171100  |
| H  | 2.26289900  | -1.18550400 | 3.03788800  |

|   |             |             |             |
|---|-------------|-------------|-------------|
| H | 0.63323300  | -1.94948200 | 2.49592200  |
| H | -2.35923600 | 1.87304100  | 2.24515400  |
| H | 1.41718700  | 3.39523900  | 0.74608500  |
| H | -1.06825600 | 3.42784200  | 0.84939400  |
| C | 2.97919600  | 2.45187000  | -1.34184600 |
| H | 3.46903800  | 1.53129300  | -1.71949000 |
| H | 3.07536400  | 3.19487500  | -2.16846600 |
| H | 3.53934200  | 2.85176400  | -0.47388300 |
| H | -1.20417600 | 2.39329600  | -0.66483500 |

#### TS<sub>1-2Ti</sub> syn-P/trans-S

E: -1021.79243370 A.U.

|    |             |             |             |
|----|-------------|-------------|-------------|
| Ti | 0.28529200  | 0.69912200  | 0.55623900  |
| N  | 2.05561800  | -0.46257500 | 0.04889500  |
| N  | -0.45420200 | -0.73541900 | -0.37772100 |
| C  | 1.78481400  | -1.60080400 | -0.65164900 |
| C  | 2.80764900  | -2.48685500 | -1.03198600 |
| H  | 2.55968800  | -3.39869900 | -1.59687200 |
| C  | 4.13283900  | -2.19580000 | -0.67816100 |
| H  | 4.94806900  | -2.87964700 | -0.96165600 |
| C  | 4.40523900  | -1.01931800 | 0.04684800  |
| H  | 5.43001600  | -0.75509700 | 0.34777300  |
| C  | 3.34283300  | -0.17905100 | 0.38801400  |
| H  | 3.51522700  | 0.74982600  | 0.95650700  |
| C  | 0.32663800  | -1.82572000 | -0.95906300 |
| H  | -0.01684900 | -2.80623300 | -0.55139400 |
| C  | -1.88902200 | -0.71515300 | -0.48453400 |
| C  | -2.68038400 | -1.38256300 | 0.51249300  |
| C  | -4.08108100 | -1.28975100 | 0.42078900  |
| H  | -4.70214700 | -1.78913100 | 1.18165400  |
| C  | -4.69745700 | -0.59801700 | -0.63437600 |
| H  | -5.79569800 | -0.53484500 | -0.68237800 |
| C  | -3.91812600 | -0.02551300 | -1.65133700 |
| H  | -4.41170200 | 0.45914500  | -2.50894900 |
| C  | -2.51223400 | -0.08336300 | -1.61461700 |
| C  | -2.07964000 | -2.24593000 | 1.59841800  |
| H  | -2.35766000 | -3.30912100 | 1.43305400  |
| C  | -1.73668200 | 0.45345800  | -2.79686000 |
| H  | -0.65876100 | 0.20669800  | -2.75826200 |
| H  | -0.97473100 | -2.19887000 | 1.63180800  |
| H  | -2.47487400 | -1.98685100 | 2.60395200  |
| H  | -1.83864600 | 1.55580800  | -2.90737200 |
| H  | -2.13714200 | 0.02249400  | -3.73779900 |
| C  | 1.39654100  | 2.06722700  | -1.44184900 |
| H  | 0.15575100  | -1.88835300 | -2.06062300 |
| H  | 0.75973000  | 1.48246300  | -2.13247600 |
| C  | 0.76644200  | 2.78358000  | -0.44002900 |
| C  | -0.65529600 | 2.72043600  | -0.13639300 |
| C  | -0.84356800 | 0.95907200  | 2.40198500  |
| H  | -1.55171200 | 0.11444500  | 2.43027500  |
| C  | -1.25504400 | 2.22437400  | 1.90984900  |
| H  | -0.73393100 | 3.12240600  | 2.28106000  |
| C  | 0.50769200  | 0.77623100  | 2.90409800  |
| H  | 1.09324300  | 1.68859500  | 3.14202600  |
| C  | 1.14700300  | -0.43822100 | 2.93333800  |
| H  | 2.20436300  | -0.51822400 | 3.23008100  |
| H  | 0.60337000  | -1.38212400 | 2.75909000  |
| H  | -2.31787600 | 2.36845900  | 1.66171000  |
| H  | 1.38726700  | 3.44844500  | 0.19475400  |
| H  | -1.09297500 | 3.67172700  | 0.19930500  |
| C  | 2.83210400  | 2.20047300  | -1.81711000 |

|   |             |            |             |
|---|-------------|------------|-------------|
| H | 3.29822200  | 1.22278500 | -2.05609900 |
| H | 2.88626000  | 2.78959000 | -2.76254000 |
| H | 3.43654100  | 2.73488000 | -1.05856700 |
| H | -1.30692600 | 2.22194700 | -0.88073500 |

# 1Ti syn-S/trans-P

E: -1021.79740144 A.U.

|    |             |             |             |
|----|-------------|-------------|-------------|
| Ti | 0.22943100  | 0.76115700  | 0.48121200  |
| N  | 2.06376200  | -0.39928600 | 0.10664500  |
| N  | -0.32256000 | -0.47185900 | -0.77821200 |
| C  | 1.92469000  | -1.30182700 | -0.90810000 |
| C  | 2.97260300  | -2.15897300 | -1.28439700 |
| H  | 2.82459400  | -2.86972400 | -2.11206800 |
| C  | 4.18746400  | -2.10722300 | -0.58653500 |
| H  | 5.01666400  | -2.77933000 | -0.85695800 |
| C  | 4.32506200  | -1.18440900 | 0.46699200  |
| H  | 5.25743400  | -1.10859100 | 1.04626500  |
| C  | 3.25138300  | -0.34329700 | 0.77089700  |
| H  | 3.34143400  | 0.40303500  | 1.57600700  |
| C  | 0.56382200  | -1.32450700 | -1.56136600 |
| H  | 0.16454000  | -2.36219700 | -1.61249700 |
| C  | -1.73877800 | -0.65623400 | -0.68548100 |
| C  | -2.24291200 | -1.70295800 | 0.16979100  |
| C  | -3.63533500 | -1.81330700 | 0.32670300  |
| H  | -4.04259300 | -2.60279100 | 0.97856400  |
| C  | -4.51653800 | -0.95292700 | -0.35654800 |
| H  | -5.60338900 | -1.05566600 | -0.21090000 |
| C  | -4.01935400 | -0.00140900 | -1.25841400 |
| H  | -4.72075100 | 0.61822500  | -1.83981900 |
| C  | -2.63337800 | 0.14975800  | -1.47185600 |
| C  | -1.34245200 | -2.74024500 | 0.80302400  |
| H  | -0.29922300 | -2.39783500 | 0.94856400  |
| C  | -2.16037500 | 1.04482300  | -2.58873600 |
| H  | -1.06016200 | 1.12143500  | -2.64604000 |
| H  | -1.74108800 | -3.08713700 | 1.77799600  |
| H  | -1.29969700 | -3.64603800 | 0.15795800  |
| H  | -2.59280900 | 2.06501100  | -2.52307700 |
| H  | -2.51279900 | 0.63178000  | -3.55879300 |
| C  | 1.90796000  | 2.41912300  | -0.41429100 |
| H  | 0.62446900  | -0.96909300 | -2.61864300 |
| H  | 2.00712900  | 2.68506400  | 0.66788500  |
| C  | 0.65145200  | 2.59009900  | -0.98944000 |
| C  | -0.50928700 | 2.75442200  | -0.18715700 |
| C  | -1.10862100 | 1.29643500  | 2.57057000  |
| H  | -0.55549400 | 2.18120200  | 2.94278300  |
| C  | -2.33365900 | 1.46656600  | 1.98381200  |
| H  | -2.93791700 | 0.60506700  | 1.65025200  |
| C  | -0.47803500 | -0.00874100 | 2.73124700  |
| H  | -1.10963600 | -0.90338500 | 2.59778700  |
| C  | 0.86396900  | -0.15398800 | 2.95435400  |
| H  | 1.50208400  | 0.72435000  | 3.17231600  |
| H  | 1.33312900  | -1.14614300 | 3.03928600  |
| H  | -2.77291100 | 2.47019900  | 1.86785000  |
| H  | 0.55178800  | 2.40360300  | -2.07404000 |
| H  | -0.39308700 | 3.33967000  | 0.74541600  |
| C  | 3.18283300  | 2.28499600  | -1.18184600 |
| H  | 3.67180000  | 3.28497500  | -1.23667400 |
| H  | 3.91908500  | 1.61553200  | -0.69399900 |
| H  | 3.01092100  | 1.94594400  | -2.22252800 |
| H  | -1.49451000 | 2.84834100  | -0.66794900 |

# TS1-2Ti syn-S/trans-P

E: -1021.77793029 A.U.

|    |             |             |             |
|----|-------------|-------------|-------------|
| Ti | -0.27685200 | 0.65246400  | -0.58689600 |
| N  | -2.11967300 | -0.39673800 | -0.13603500 |
| N  | 0.31099000  | -0.63522300 | 0.61928300  |
| C  | -1.97626600 | -1.36484900 | 0.81488900  |
| C  | -3.06359900 | -2.14958700 | 1.23534500  |
| H  | -2.91308300 | -2.92229600 | 2.00502800  |
| C  | -4.32314900 | -1.94634800 | 0.65453000  |
| H  | -5.18526000 | -2.55844400 | 0.96196400  |
| C  | -4.46506100 | -0.95119300 | -0.33130200 |
| H  | -5.43284700 | -0.75873200 | -0.81800400 |
| C  | -3.34672300 | -0.19620200 | -0.69196400 |
| H  | -3.42814700 | 0.59398300  | -1.45626000 |
| C  | -0.57354100 | -1.54563100 | 1.33969400  |
| H  | -0.23836200 | -2.60046200 | 1.20904500  |
| C  | 1.73620000  | -0.76851700 | 0.61040200  |
| C  | 2.34919100  | -1.71622700 | -0.28701100 |
| C  | 3.75114000  | -1.71246500 | -0.39463700 |
| H  | 4.23835600  | -2.41632800 | -1.08826800 |
| C  | 4.53971900  | -0.85075400 | 0.38878900  |
| H  | 5.63559800  | -0.86089600 | 0.28016200  |
| C  | 3.93919800  | -0.02407000 | 1.35161500  |
| H  | 4.57179400  | 0.57895700  | 2.02275200  |
| C  | 2.54031900  | 0.01662900  | 1.50775600  |
| C  | 1.55886300  | -2.77424100 | -1.02334900 |
| H  | 0.48811700  | -2.52649400 | -1.15066200 |
| C  | 1.96144100  | 0.78445200  | 2.67316800  |
| H  | 0.87001300  | 0.64785300  | 2.78310100  |
| H  | 1.99436700  | -2.99469400 | -2.01928900 |
| H  | 1.60571900  | -3.73105000 | -0.45686700 |
| H  | 2.18642900  | 1.87129000  | 2.62332600  |
| H  | 2.43018100  | 0.42758900  | 3.61438600  |
| C  | -1.66181600 | 2.51293900  | 0.46234800  |
| H  | -0.52993500 | -1.35039800 | 2.43827100  |
| H  | -1.91768300 | 2.90278100  | -0.55008100 |
| C  | -0.32457900 | 2.51961800  | 0.83575300  |
| C  | 0.76924300  | 2.93290100  | -0.02323000 |
| C  | 0.81363500  | 1.40313900  | -2.46369000 |
| H  | 0.10013300  | 2.11463500  | -2.93142800 |
| C  | 1.79946800  | 1.95337400  | -1.59912500 |
| H  | 2.53656900  | 1.27658900  | -1.12797800 |
| C  | 0.54216500  | 0.00986400  | -2.62728400 |
| H  | 1.35336500  | -0.71338700 | -2.43976000 |
| C  | -0.77007100 | -0.43361100 | -2.73936300 |
| H  | -1.57131800 | 0.27384200  | -3.03100500 |
| H  | -1.02185100 | -1.50313800 | -2.79757800 |
| H  | 2.18805200  | 2.95883000  | -1.81648400 |
| H  | -0.07487900 | 2.19579200  | 1.85993500  |
| H  | 0.50011400  | 3.72590300  | -0.74099700 |
| C  | -2.79842800 | 2.33000700  | 1.41426800  |
| H  | -3.64211700 | 1.75763500  | 0.97920100  |
| H  | -2.48370400 | 1.86009800  | 2.36681200  |
| H  | -3.21306500 | 3.33515600  | 1.65990500  |
| H  | 1.72086400  | 3.10953300  | 0.50411600  |

# 1Ti syn-S/trans-S

E: -1021.79571382 A.U.

|    |             |            |            |
|----|-------------|------------|------------|
| Ti | -0.25307500 | 0.64728500 | 0.27055700 |
|----|-------------|------------|------------|

|   |             |             |             |
|---|-------------|-------------|-------------|
| N | -2.21744900 | 0.03818200  | -0.41134600 |
| N | -0.10700200 | -1.18415200 | 0.17971700  |
| C | -2.38336700 | -1.31721700 | -0.50258800 |
| C | -3.57172700 | -1.87839400 | -0.99510300 |
| H | -3.67911500 | -2.97277100 | -1.04711200 |
| C | -4.60178100 | -1.03107900 | -1.43092900 |
| H | -5.53840200 | -1.45232900 | -1.82841900 |
| C | -4.41879100 | 0.36261100  | -1.35779000 |
| H | -5.19668700 | 1.06268500  | -1.69710700 |
| C | -3.22385700 | 0.85633400  | -0.82874300 |
| H | -3.05875200 | 1.94221900  | -0.73545700 |
| C | -1.18391200 | -2.13006800 | -0.07211500 |
| H | -0.89693000 | -2.86351800 | -0.85970600 |
| C | 1.29546600  | -1.43563000 | 0.09117800  |
| C | 1.92675300  | -1.45644000 | -1.20682400 |
| C | 3.32201900  | -1.62382900 | -1.25701900 |
| H | 3.82656800  | -1.64419900 | -2.23649800 |
| C | 4.07470100  | -1.80926300 | -0.08350400 |
| H | 5.16566300  | -1.94485800 | -0.15085600 |
| C | 3.44234000  | -1.86623000 | 1.16823200  |
| H | 4.03941600  | -2.06680600 | 2.07213300  |
| C | 2.04908800  | -1.70701300 | 1.28798300  |
| C | 1.14010900  | -1.42700000 | -2.49806800 |
| H | 0.10862100  | -1.03670600 | -2.39051000 |
| C | 1.39176000  | -1.91860700 | 2.62839700  |
| H | 0.30865100  | -1.69673300 | 2.62127600  |
| H | 1.65866500  | -0.83904000 | -3.28268000 |
| H | 1.04935900  | -2.45823100 | -2.90540100 |
| H | 1.87738000  | -1.31973800 | 3.42695000  |
| H | 1.50903300  | -2.98099100 | 2.93388400  |
| C | -1.61131900 | 1.65245800  | 1.95036100  |
| H | -1.41500100 | -2.73178200 | 0.83978800  |
| H | -1.48965800 | 2.55601700  | 1.29770000  |
| C | -0.44593300 | 1.17421300  | 2.56051300  |
| C | 0.82939200  | 1.45578900  | 2.01584100  |
| C | 2.77409700  | 2.59777800  | -1.34106700 |
| H | 3.09637900  | 1.61701000  | -1.73228800 |
| C | 3.70033700  | 3.55526300  | -1.04328100 |
| H | 3.40437000  | 4.54914300  | -0.66497500 |
| C | 1.36404800  | 2.85124000  | -1.20586900 |
| H | 1.08347900  | 3.84455500  | -0.80376000 |
| C | 0.33934400  | 1.97425700  | -1.54607800 |
| H | -0.68426900 | 2.39030400  | -1.64030900 |
| H | 0.56865900  | 1.09233800  | -2.17627200 |
| H | 4.77837000  | 3.37776400  | -1.18765700 |
| H | -0.54778400 | 0.36670600  | 3.30836400  |
| H | 0.98936500  | 2.45450500  | 1.55762000  |
| C | -2.99857200 | 1.38158900  | 2.45229700  |
| H | -3.30826500 | 2.20164900  | 3.13849900  |
| H | -3.75617200 | 1.35075000  | 1.64460400  |
| H | -3.04994400 | 0.43489700  | 3.02621400  |
| H | 1.73463400  | 0.98410200  | 2.42618200  |

#### TS<sub>1-2Ti</sub> syn-S/trans-S

E: -1021.79073217 A.U.

|    |             |             |             |
|----|-------------|-------------|-------------|
| Ti | 0.27759200  | 0.82778600  | 0.33554700  |
| N  | 2.13514000  | -0.29375300 | 0.13418700  |
| N  | -0.31407900 | -0.83103000 | -0.26502600 |
| C  | 1.97337000  | -1.55582300 | -0.35790500 |
| C  | 3.07301800  | -2.40200500 | -0.58421100 |
| H  | 2.90941700  | -3.41692000 | -0.97806800 |

|   |             |             |             |
|---|-------------|-------------|-------------|
| C | 4.36527400  | -1.93616200 | -0.30549600 |
| H | 5.24019700  | -2.58270900 | -0.47614900 |
| C | 4.52748700  | -0.62924200 | 0.19540900  |
| H | 5.52329200  | -0.22294900 | 0.42735700  |
| C | 3.39242300  | 0.15696400  | 0.40199600  |
| H | 3.48442700  | 1.18055300  | 0.80159800  |
| C | 0.54530900  | -1.95140800 | -0.62866800 |
| H | 0.26819900  | -2.86457900 | -0.05013100 |
| C | -1.74511900 | -0.91129600 | -0.31038800 |
| C | -2.45711600 | -1.45574600 | 0.81685200  |
| C | -3.86130900 | -1.43119400 | 0.78957300  |
| H | -4.42280800 | -1.83285000 | 1.64829500  |
| C | -4.55962800 | -0.92727600 | -0.32312400 |
| H | -5.66070800 | -0.91043100 | -0.31669800 |
| C | -3.85995500 | -0.49506400 | -1.45870700 |
| H | -4.41709200 | -0.17474000 | -2.35366800 |
| C | -2.45117300 | -0.50417600 | -1.49622800 |
| C | -1.75533500 | -2.12442300 | 1.97751300  |
| H | -0.66839300 | -1.91689500 | 2.00828400  |
| C | -1.76104100 | -0.24009100 | -2.81323400 |
| H | -0.66279900 | -0.15107100 | -2.72476900 |
| H | -2.20006700 | -1.83858600 | 2.95345300  |
| H | -1.87367700 | -3.22784400 | 1.90426100  |
| H | -2.15909500 | 0.66510000  | -3.31774300 |
| H | -1.96685400 | -1.08369300 | -3.50793700 |
| C | 1.24419000  | 1.98946300  | -1.45824800 |
| H | 0.40649300  | -2.22324500 | -1.70238000 |
| H | 1.91743400  | 2.45967300  | -0.69812200 |
| C | -0.09774500 | 2.36409100  | -1.39679500 |
| C | -0.65093600 | 3.08851400  | -0.28775200 |
| C | -0.88620600 | 1.23929400  | 2.14717300  |
| H | -1.39765000 | 0.27603300  | 2.29877800  |
| C | -1.56907000 | 2.30892300  | 1.51072000  |
| H | -1.39579000 | 3.33470900  | 1.87171000  |
| C | 0.44868400  | 1.42253100  | 2.69154000  |
| H | 0.84693100  | 2.45568200  | 2.75119100  |
| C | 1.27937200  | 0.37956300  | 3.01152900  |
| H | 2.31440500  | 0.55521200  | 3.34479200  |
| H | 0.92047600  | -0.66369400 | 3.02493600  |
| H | -2.58601700 | 2.11115400  | 1.13609200  |
| H | -0.78310500 | 2.01401200  | -2.18709400 |
| H | 0.05339700  | 3.74821700  | 0.25209900  |
| C | 1.92712800  | 1.39057600  | -2.65071700 |
| H | 2.43012500  | 2.20264400  | -3.22298100 |
| H | 2.71980000  | 0.66824600  | -2.37184900 |
| H | 1.21312100  | 0.90261000  | -3.34290600 |
| H | -1.63784300 | 3.54249100  | -0.46350600 |

#### 2Ti syn-P/trans-P

E: -1021.81672453 A.U.

|    |             |             |             |
|----|-------------|-------------|-------------|
| Ti | -0.40468400 | 0.78469700  | -0.03891600 |
| N  | -2.43204000 | 0.08785700  | -0.02144700 |
| N  | -0.15849400 | -1.04358400 | -0.18881200 |
| C  | -2.55465300 | -1.26092900 | -0.20274400 |
| C  | -3.81584300 | -1.87568600 | -0.24012100 |
| H  | -3.89123300 | -2.96372700 | -0.38980700 |
| C  | -4.96707600 | -1.08806500 | -0.08457600 |
| H  | -5.96525400 | -1.55260800 | -0.11135800 |
| C  | -4.83211200 | 0.30128500  | 0.10358900  |
| H  | -5.71020800 | 0.95223200  | 0.22800500  |
| C  | -3.54960400 | 0.85303200  | 0.12347400  |



|   |             |             |             |
|---|-------------|-------------|-------------|
| H | -3.40300300 | 1.93837300  | 0.25731900  |
| C | -1.24881400 | -2.00187000 | -0.35379500 |
| H | -1.19021300 | -2.49904200 | -1.35180700 |
| C | 1.21524200  | -1.43393800 | -0.07620800 |
| C | 2.03051800  | -1.52193300 | -1.25826800 |
| C | 3.39881800  | -1.81683100 | -1.09521200 |
| H | 4.04258200  | -1.88066400 | -1.98710300 |
| C | 3.94161200  | -2.07018100 | 0.17303600  |
| H | 5.01428700  | -2.29756300 | 0.27524200  |
| C | 3.11286800  | -2.08528700 | 1.30975500  |
| H | 3.53879200  | -2.35165000 | 2.29034500  |
| C | 1.74086300  | -1.79554100 | 1.21431200  |
| C | 1.45786700  | -1.46080800 | -2.65502200 |
| H | 0.41809000  | -1.08750200 | -2.69303500 |
| C | 0.86372100  | -1.96872800 | 2.43393800  |
| H | -0.11954400 | -1.46561500 | 2.35279600  |
| H | 2.08615500  | -0.85006000 | -3.33615500 |
| H | 1.45288000  | -2.48367400 | -3.09181900 |
| H | 1.36696200  | -1.61412900 | 3.35654400  |
| H | 0.66060100  | -3.05015100 | 2.59797300  |
| C | 0.65351000  | 1.44533000  | 1.96884400  |
| H | -1.16438400 | -2.82040300 | 0.39891300  |
| H | 1.26586400  | 0.53498400  | 2.10703500  |
| C | 1.23225700  | 2.52368000  | 1.34226100  |
| C | 2.58494600  | 2.54750200  | 0.67524400  |
| C | 0.94976600  | 2.74135100  | -1.18041500 |
| H | 0.21118000  | 3.50181500  | -0.85556900 |
| C | 2.38976600  | 3.00456500  | -0.80137400 |
| H | 3.09079500  | 2.46942000  | -1.47205100 |
| C | 0.46710100  | 1.73860900  | -2.01413000 |
| H | 1.19006000  | 1.05939000  | -2.49931200 |
| C | -0.92620900 | 1.42278200  | -2.04898900 |
| H | -1.63906400 | 2.24647400  | -1.82284800 |
| H | -1.31536900 | 0.67084500  | -2.75371400 |
| H | 2.59796500  | 4.08975500  | -0.91523000 |
| H | 0.68191900  | 3.48471800  | 1.36838600  |
| H | 3.26354800  | 3.22870100  | 1.23486600  |
| C | -0.69356600 | 1.49788000  | 2.64570000  |
| H | -1.42565100 | 0.74932800  | 2.23757600  |
| H | -0.60894600 | 1.19982800  | 3.71400000  |
| H | -1.15798100 | 2.50435000  | 2.60313600  |
| H | 3.04008700  | 1.53600800  | 0.70985500  |

#### 2Ti syn-P/trans-S

E: -1021.81790690 A.U.

|    |             |             |             |
|----|-------------|-------------|-------------|
| Ti | -0.37367400 | 0.69508500  | -0.08139600 |
| N  | -2.39666400 | -0.01973500 | -0.04010900 |
| N  | -0.11373400 | -1.13578200 | -0.17982100 |
| C  | -2.50670400 | -1.37657600 | -0.16107000 |
| C  | -3.76086100 | -2.00731200 | -0.14220700 |
| H  | -3.82588200 | -3.10115900 | -0.24788500 |
| C  | -4.91713600 | -1.22849600 | 0.01728000  |
| H  | -5.90961400 | -1.70535400 | 0.03566100  |
| C  | -4.79432000 | 0.16827300  | 0.15108100  |
| H  | -5.67686000 | 0.81275800  | 0.27758300  |
| C  | -3.51964400 | 0.73656100  | 0.10661100  |
| H  | -3.38246700 | 1.82861300  | 0.18279300  |
| C  | -1.19444200 | -2.11111900 | -0.29932100 |
| H  | -1.14150600 | -2.64696700 | -1.27765800 |
| C  | 1.25995200  | -1.48834300 | 0.02240400  |
| C  | 2.10763700  | -1.71465600 | -1.11756900 |

|   |             |             |             |
|---|-------------|-------------|-------------|
| C | 3.46645100  | -1.99170000 | -0.88496900 |
| H | 4.13338400  | -2.16481900 | -1.74469500 |
| C | 3.97964500  | -2.07532500 | 0.42074600  |
| H | 5.04873300  | -2.28927100 | 0.57591800  |
| C | 3.13014800  | -1.92476600 | 1.52834000  |
| H | 3.53449700  | -2.04431000 | 2.54624700  |
| C | 1.75831100  | -1.65515000 | 1.36242100  |
| C | 1.57755900  | -1.75373700 | -2.53168700 |
| H | 0.55962900  | -1.33226100 | -2.63296200 |
| C | 0.86113000  | -1.65009600 | 2.57870200  |
| H | 0.77604600  | -2.68162600 | 2.98449000  |
| H | 2.25075600  | -1.22660200 | -3.23901200 |
| H | 1.53037600  | -2.80651000 | -2.88750600 |
| H | -0.16845800 | -1.30174900 | 2.36949100  |
| H | 1.28496600  | -1.03721500 | 3.40051100  |
| C | 0.63290300  | 1.97206100  | 1.58478100  |
| H | -1.09537900 | -2.89867300 | 0.48417900  |
| H | 1.40576000  | 1.18570900  | 1.39517100  |
| C | 0.87400600  | 3.22648300  | 1.08525000  |
| C | 1.93217000  | 3.60531100  | 0.09632400  |
| C | 1.33275600  | 1.68321000  | -1.46972600 |
| H | 1.62768100  | 0.72598800  | -1.93748600 |
| C | 2.44203100  | 2.45178200  | -0.78059800 |
| H | 3.13930000  | 2.85502500  | -1.55098600 |
| C | 0.07217300  | 2.19735700  | -1.80034200 |
| H | -0.16987600 | 3.23685200  | -1.50455000 |
| C | -1.01736000 | 1.35186100  | -2.12717000 |
| H | -2.01480200 | 1.78796700  | -2.29526700 |
| H | -0.83423900 | 0.39693800  | -2.65622500 |
| H | 3.06340100  | 1.74026800  | -0.19505900 |
| H | 0.22072900  | 4.04906100  | 1.43863000  |
| H | 1.54859600  | 4.44590000  | -0.52262300 |
| C | -0.47275700 | 1.63809200  | 2.55845900  |
| H | -0.07410400 | 1.22357400  | 3.50772200  |
| H | -1.10436800 | 2.52023200  | 2.78413700  |
| H | -1.17134400 | 0.83068900  | 2.19267300  |
| H | 2.77676000  | 4.07139300  | 0.66047200  |

#### 2Ti syn-S/trans-P

E: -1021.82004193 A.U.

|    |             |             |             |
|----|-------------|-------------|-------------|
| Ti | -0.43227100 | 0.79999400  | -0.16400800 |
| N  | -2.45956700 | 0.08196900  | -0.04168700 |
| N  | -0.15464000 | -1.01602800 | 0.09378300  |
| C  | -2.55080600 | -1.26982300 | 0.13184600  |
| C  | -3.79753500 | -1.90374200 | 0.25182400  |
| H  | -3.84637100 | -2.99527100 | 0.38659200  |
| C  | -4.96802300 | -1.13150300 | 0.19587700  |
| H  | -5.95498800 | -1.61151400 | 0.28686300  |
| C  | -4.86549900 | 0.26154900  | 0.01734000  |
| H  | -5.75879600 | 0.90151500  | -0.03531300 |
| C  | -3.59585700 | 0.83032100  | -0.10457900 |
| H  | -3.47524800 | 1.91579000  | -0.26021100 |
| C  | -1.23067900 | -2.00096200 | 0.17057400  |
| H  | -1.16274000 | -2.73132300 | -0.67064100 |
| C  | 1.23248700  | -1.36661900 | 0.15813400  |
| C  | 1.91261700  | -1.80043400 | -1.03530100 |
| C  | 3.29633000  | -2.04310100 | -0.95285500 |
| H  | 3.83851500  | -2.36221300 | -1.85744000 |
| C  | 3.98752800  | -1.92149000 | 0.26454500  |
| H  | 5.07069700  | -2.11711200 | 0.30101800  |
| C  | 3.29424800  | -1.60368000 | 1.44354700  |

|   |             |             |             |   |             |             |             |
|---|-------------|-------------|-------------|---|-------------|-------------|-------------|
| H | 3.83265900  | -1.58536700 | 2.40477500  | H | -0.53400400 | -1.65093900 | 2.05814100  |
| C | 1.91042900  | -1.34629400 | 1.42729900  | H | 2.47950000  | -0.74300000 | -3.22250900 |
| C | 1.18711400  | -2.12539900 | -2.32051700 | H | 1.81037200  | -2.37949300 | -3.12039700 |
| H | 0.16467900  | -1.70765200 | -2.37497700 | H | 0.78772000  | -1.83379100 | 3.26808700  |
| C | 1.17858500  | -1.19212700 | 2.74026900  | H | 0.26724600  | -3.22265800 | 2.30156600  |
| H | 0.12311100  | -0.88417900 | 2.62068300  | C | 0.37135000  | 2.16939600  | 1.78873500  |
| H | 1.75706600  | -1.79131500 | -3.21186800 | H | -1.21408900 | -2.88148700 | -0.13909200 |
| H | 1.09483700  | -3.22958500 | -2.42135400 | H | -0.13816200 | 3.10896900  | 1.48810400  |
| H | 1.68639800  | -0.47921700 | 3.42338600  | C | 1.67786000  | 2.00617400  | 1.40749200  |
| H | 1.17466600  | -2.16623900 | 3.27623200  | C | 2.42447300  | 2.95072100  | 0.51140300  |
| C | 0.28386300  | 2.55541700  | 1.37148700  | C | 1.31331000  | 1.80822200  | -1.47770700 |
| H | -1.13406200 | -2.60470800 | 1.10387500  | H | 1.37830100  | 0.93386500  | -2.14946400 |
| H | -0.06178300 | 3.48626500  | 0.87824500  | C | 2.61444100  | 2.29612100  | -0.87957700 |
| C | 1.59312900  | 2.18137100  | 1.18346900  | H | 3.10506100  | 3.01879600  | -1.57215600 |
| C | 2.54657900  | 2.88475600  | 0.24976000  | C | 0.10366100  | 2.50957200  | -1.48732500 |
| C | 1.01687600  | 2.17768300  | -1.57610000 | H | 0.04860400  | 3.49880000  | -0.99448900 |
| H | 0.40494200  | 3.07977700  | -1.35891500 | C | -1.11687500 | 1.84921100  | -1.78651300 |
| C | 2.46253900  | 2.27391500  | -1.17845800 | H | -2.06926700 | 2.40017300  | -1.72655300 |
| H | 2.94664400  | 1.27551000  | -1.21503100 | H | -1.11623900 | 1.00735700  | -2.50748500 |
| C | 0.38595500  | 1.17893400  | -2.31147600 | H | 3.31392700  | 1.43820800  | -0.79852700 |
| H | 0.98559600  | 0.33330100  | -2.68842700 | H | 2.22425700  | 1.10481500  | 1.75222000  |
| C | -1.03288200 | 1.06181800  | -2.26751500 | H | 1.88904500  | 3.91958500  | 0.43145500  |
| H | -1.62616700 | 1.99754800  | -2.16780900 | C | -0.39982600 | 1.24760900  | 2.69597300  |
| H | -1.54928100 | 0.25204000  | -2.80600500 | H | -0.95053400 | 1.83041200  | 3.46531700  |
| H | 3.01984900  | 2.92630700  | -1.88909000 | H | -1.23084500 | 0.68136400  | 2.17949800  |
| H | 1.97920200  | 1.30741100  | 1.74172600  | H | 0.24486900  | 0.50030600  | 3.19379500  |
| H | 2.28846700  | 3.96392800  | 0.20166100  | H | 3.42091000  | 3.17148300  | 0.95118800  |
| C | -0.68408600 | 1.91658800  | 2.33399200  |   |             |             |             |
| H | -1.27031600 | 2.69552900  | 2.86630200  |   |             |             |             |
| H | -1.49190000 | 1.29470400  | 1.84433700  |   |             |             |             |
| H | -0.18748300 | 1.26020600  | 3.07211500  |   |             |             |             |
| H | 3.58374300  | 2.81133200  | 0.63379300  |   |             |             |             |

## 2Ti syn-S/trans-S

E: -1021.82302366 A.U.

|    |             |             |             |
|----|-------------|-------------|-------------|
| Ti | -0.33476300 | 0.74669800  | -0.01222500 |
| N  | -2.40132900 | 0.09066300  | -0.01240000 |
| N  | -0.18307900 | -1.04976400 | -0.44289100 |
| C  | -2.57445500 | -1.20568600 | -0.40740300 |
| C  | -3.85352300 | -1.78007500 | -0.48344000 |
| H  | -3.96655900 | -2.82421000 | -0.81343700 |
| C  | -4.97178300 | -1.01126900 | -0.12839200 |
| H  | -5.98280000 | -1.44500300 | -0.17732900 |
| C  | -4.78556100 | 0.32076300  | 0.28908200  |
| H  | -5.63606000 | 0.95718600  | 0.57534300  |
| C  | -3.48916400 | 0.83882900  | 0.32177900  |
| H  | -3.30625400 | 1.88572700  | 0.61728500  |
| C  | -1.29765600 | -1.94399200 | -0.73584200 |
| H  | -1.29026100 | -2.26120600 | -1.80659500 |
| C  | 1.15286700  | -1.44027700 | -0.14312100 |
| C  | 2.13824800  | -1.48112700 | -1.19562600 |
| C  | 3.47187000  | -1.75471900 | -0.84199100 |
| H  | 4.24199000  | -1.78370700 | -1.62947900 |
| C  | 3.82807300  | -2.03265800 | 0.48881600  |
| H  | 4.87929500  | -2.24456300 | 0.74034400  |
| C  | 2.84508400  | -2.09769900 | 1.49188300  |
| H  | 3.12984700  | -2.39139200 | 2.51495300  |
| C  | 1.49283300  | -1.83956800 | 1.20253700  |
| C  | 1.76359200  | -1.37084300 | -2.65305300 |
| H  | 0.73799100  | -0.98900600 | -2.81732200 |
| C  | 0.44647500  | -2.12541200 | 2.25454400  |
